# Supplementary material
Source: PubMed Central journal article supplement (PMC7000114)

**MoA\_N45\_pep1\_2-5-0-0**

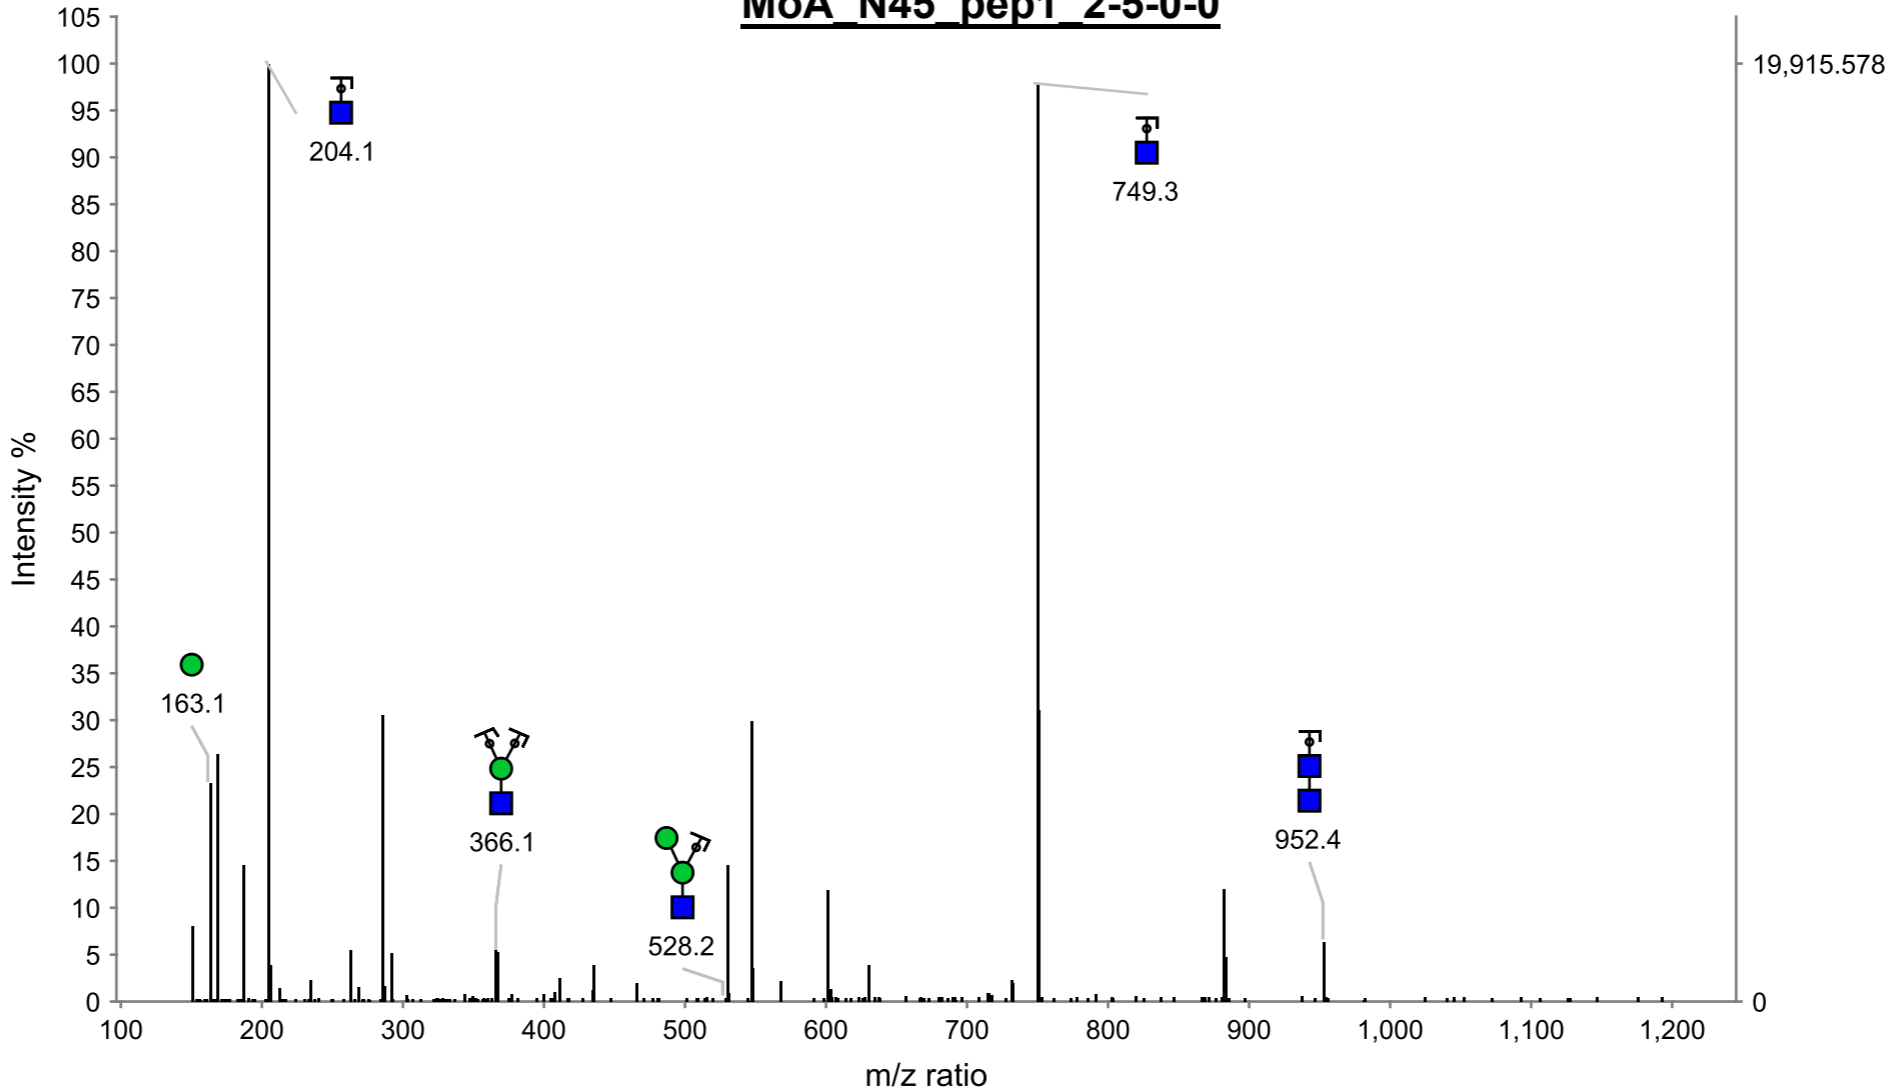

# MoA\_N45\_pep1\_2-6-0-0

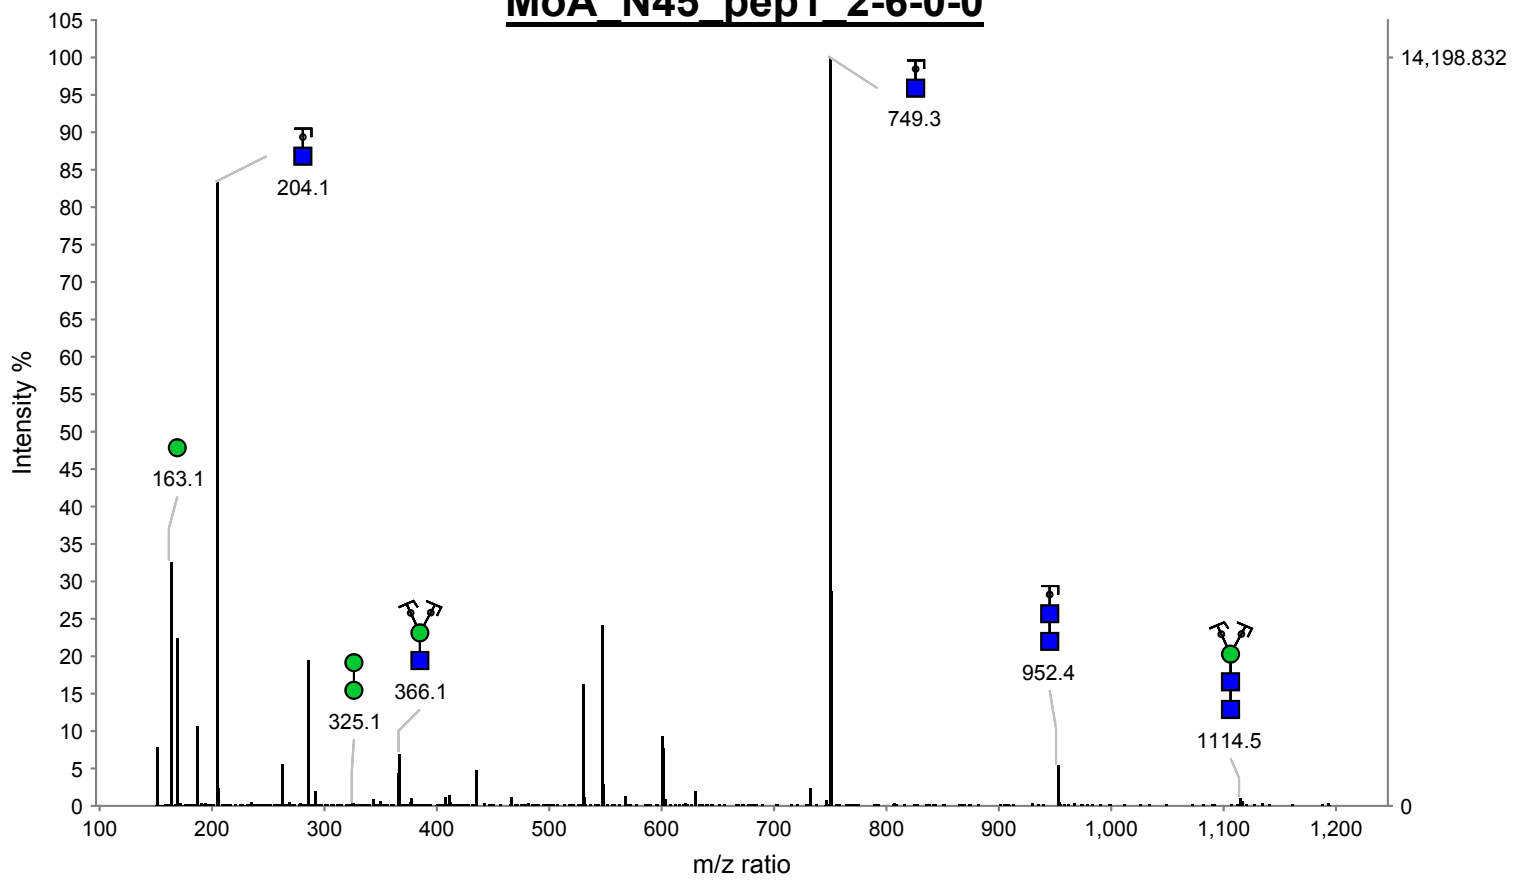

# MoA\_N45\_pep1\_2-8-0-0

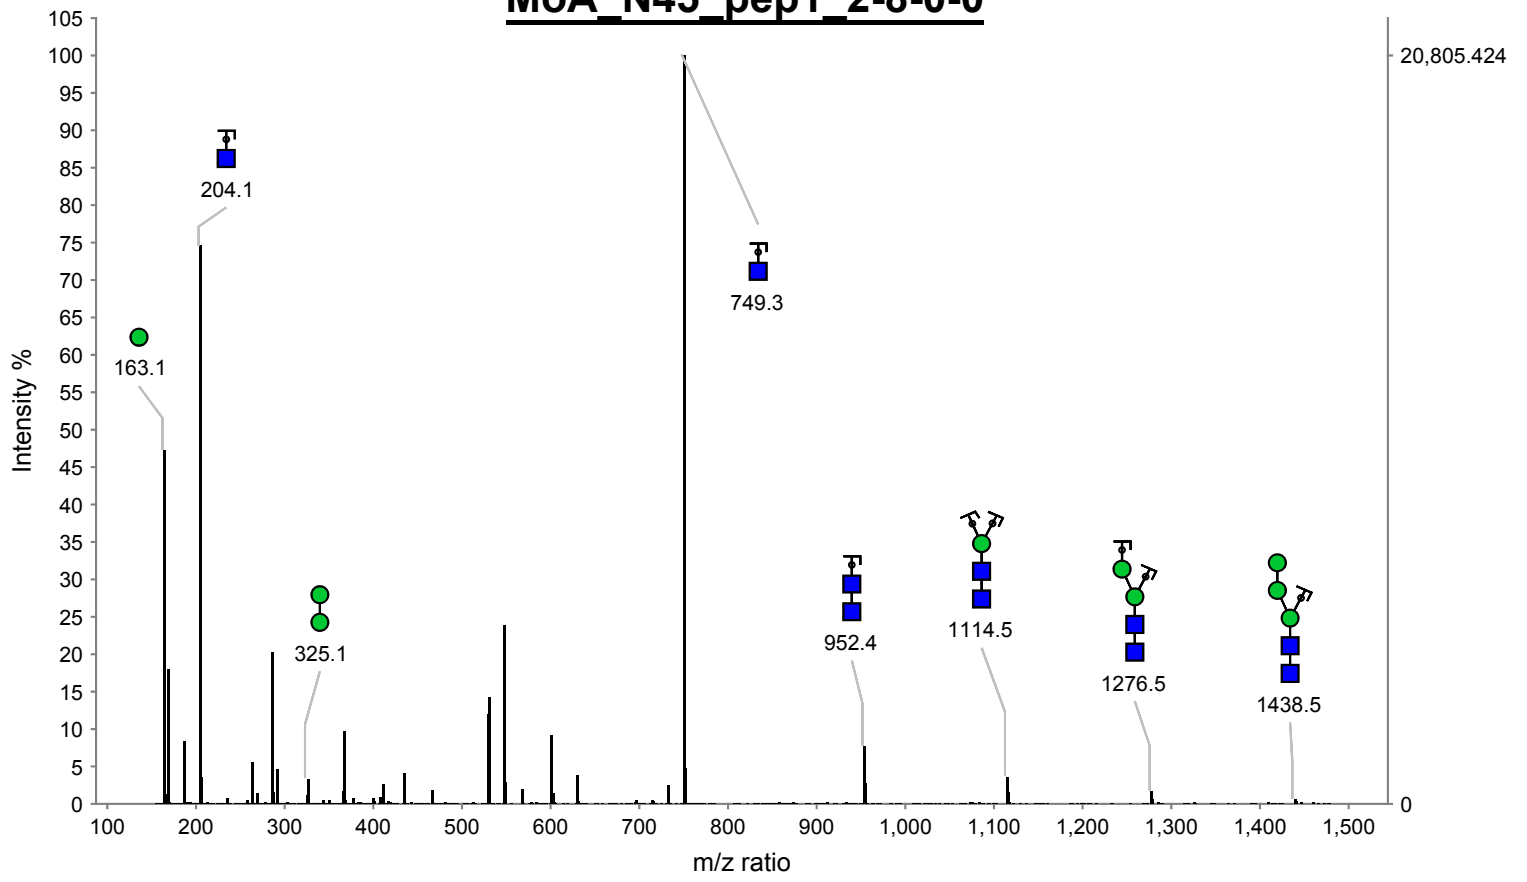

# MoA N45 pep1 2-9-0-0

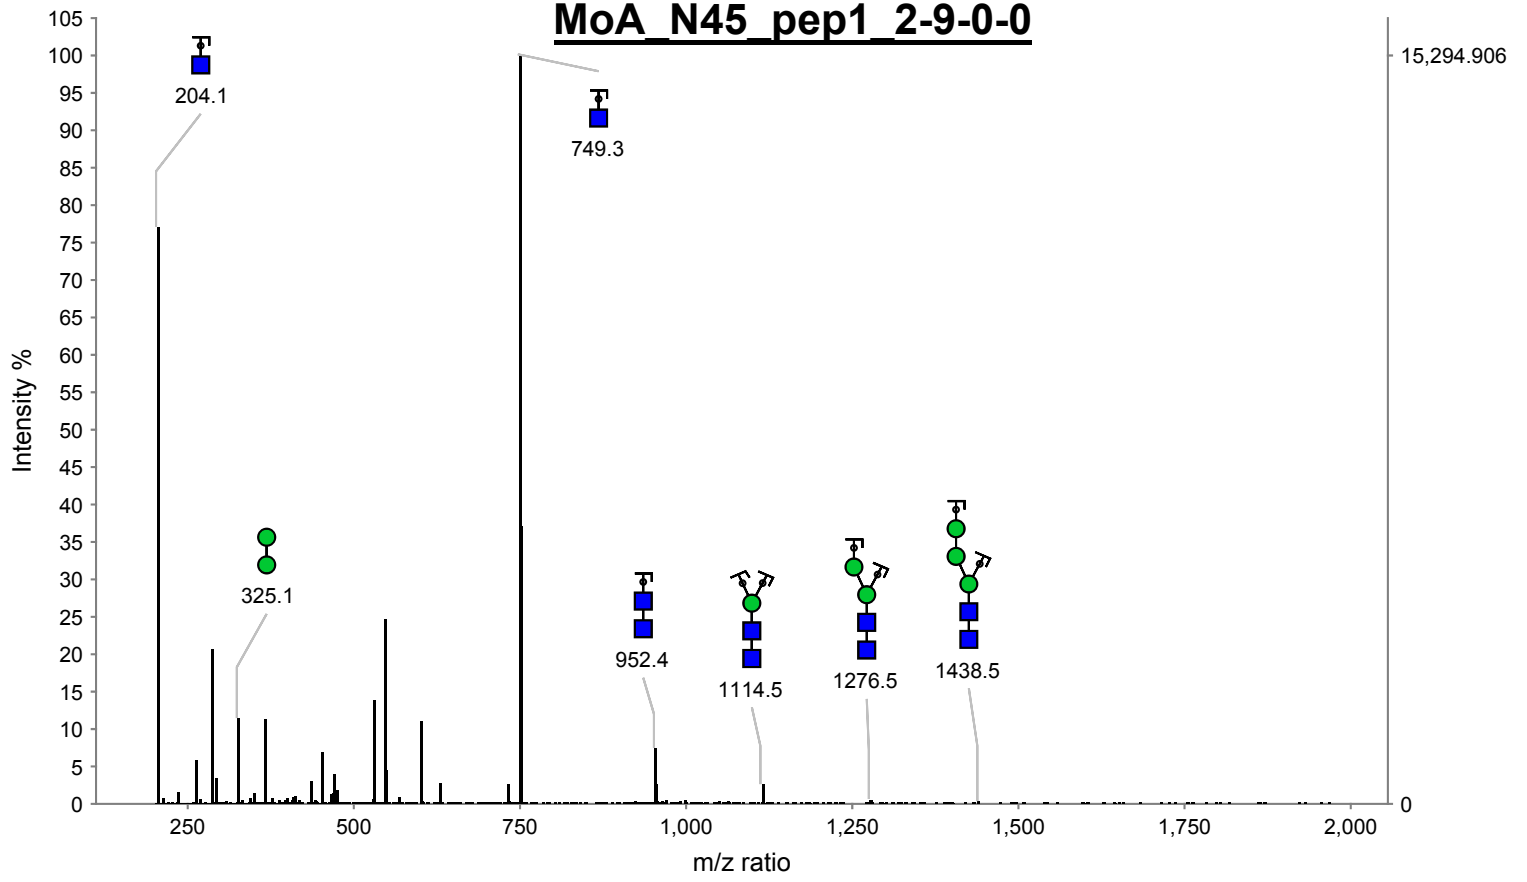

# MoA N45 pep1 3-4-0-0

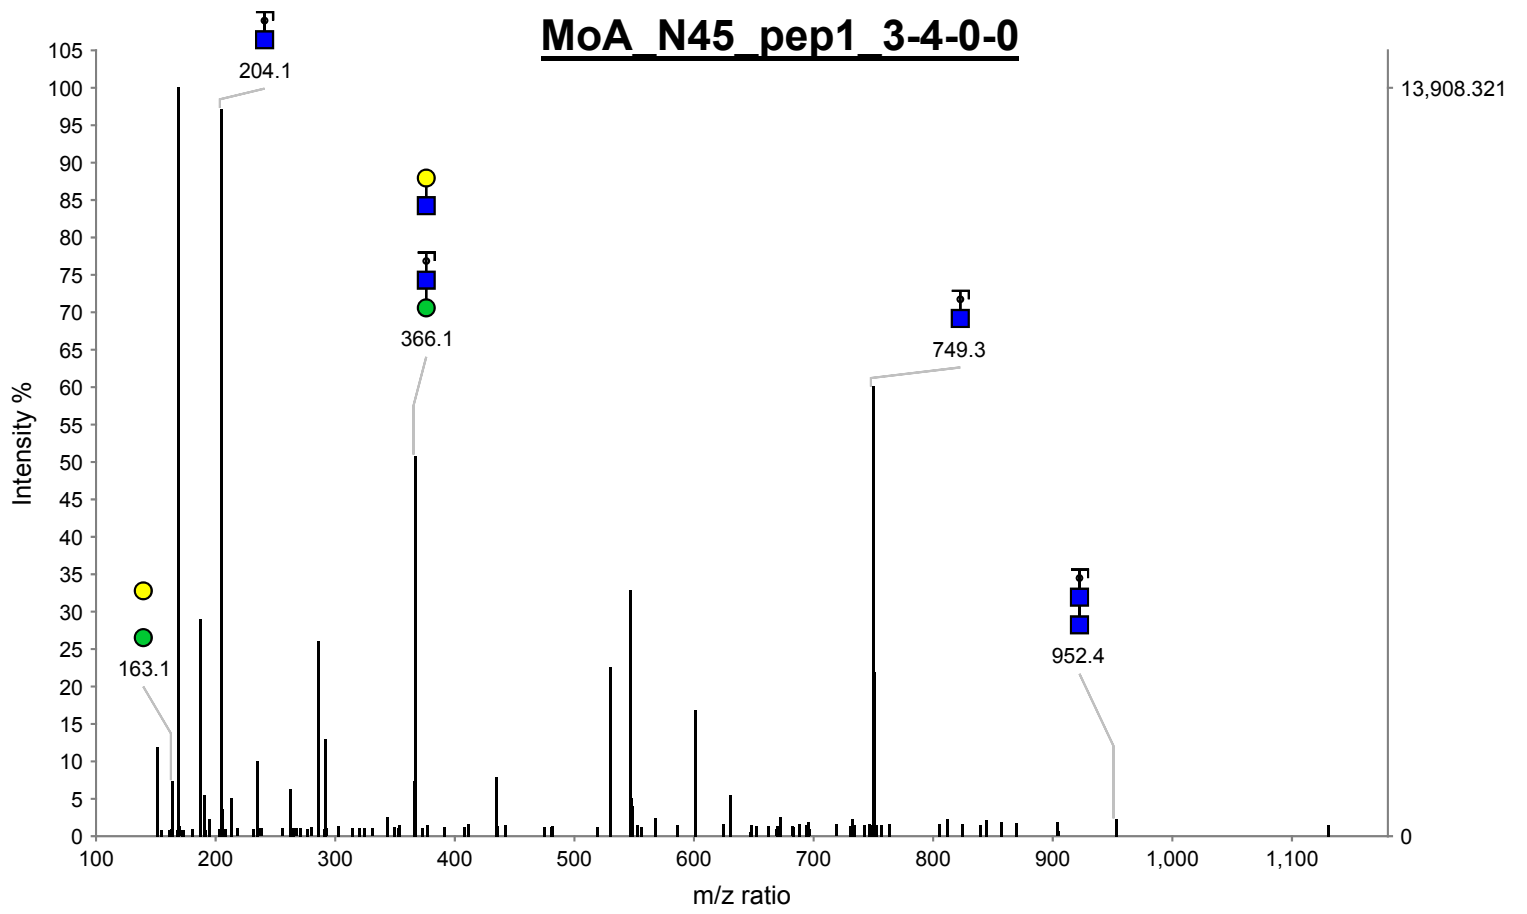

# MoA N45 pep1 3-4-0-1

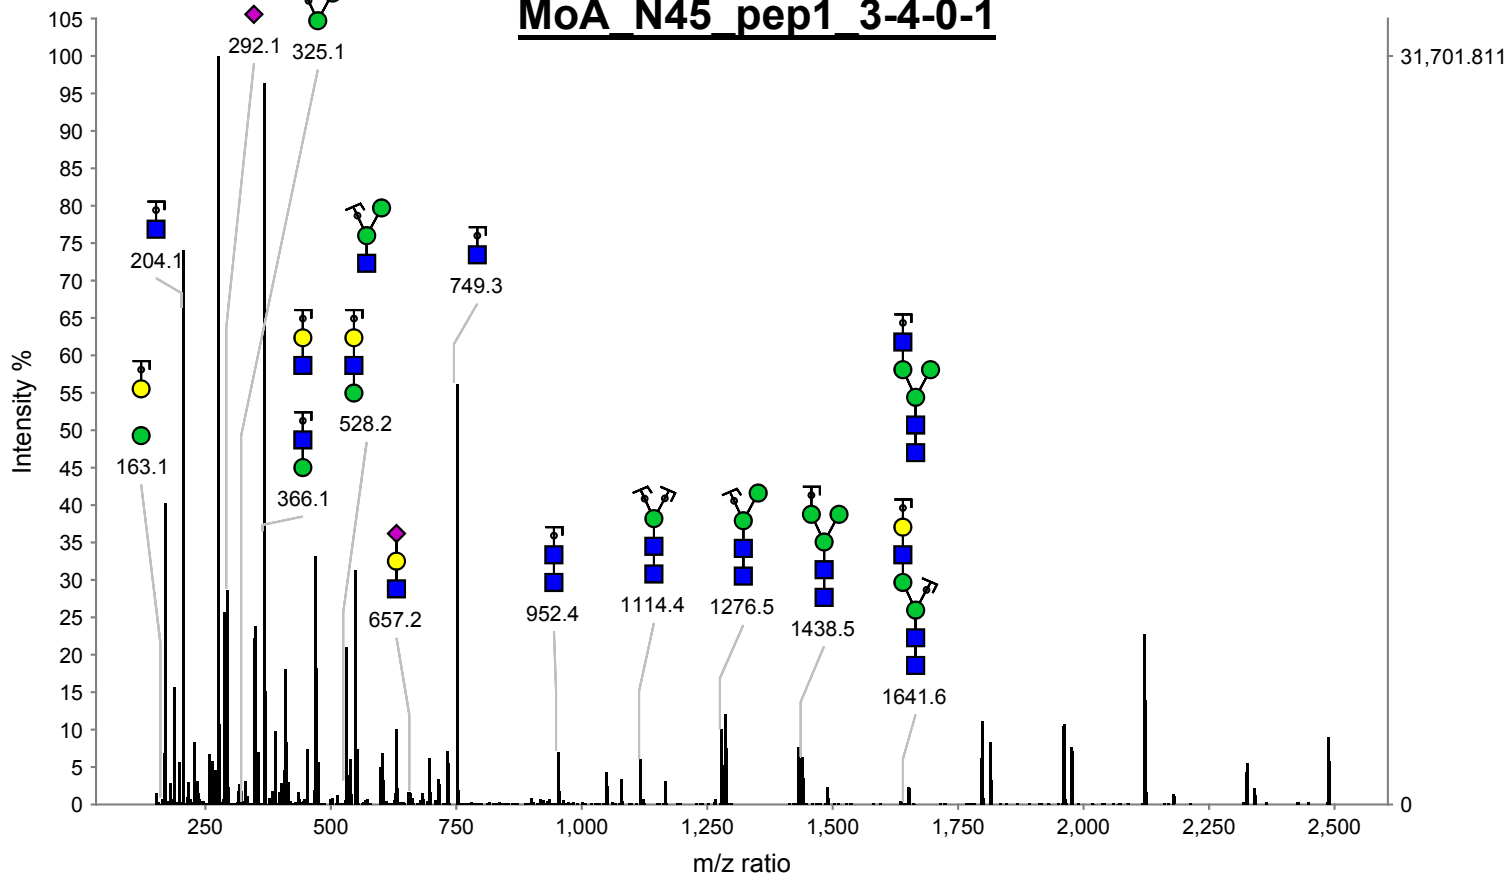

# MoA N45\_pep1 3-4-1-1

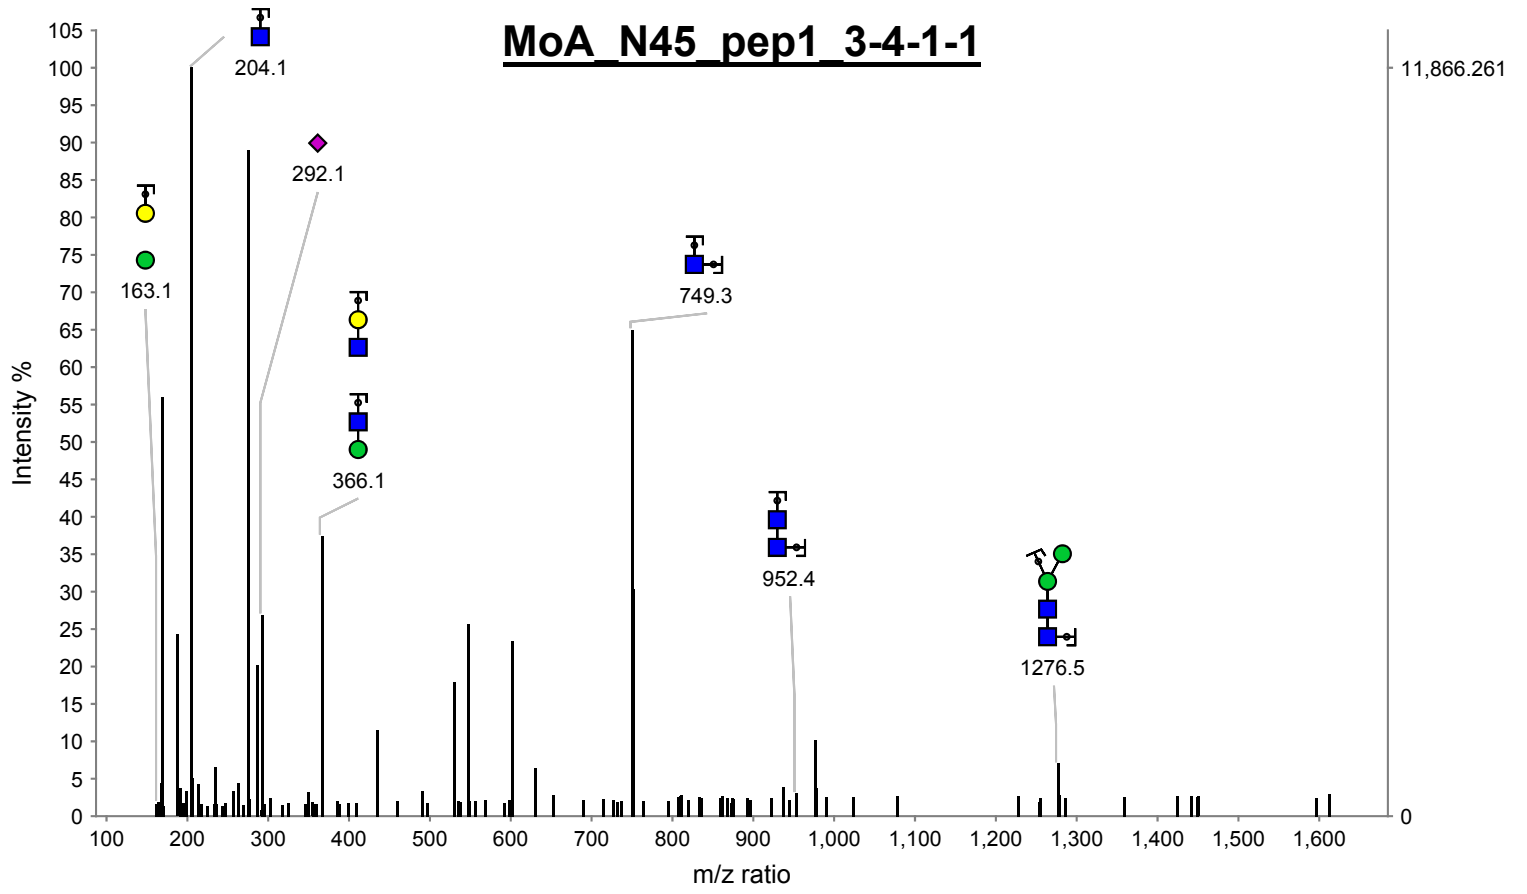

# MoA N45 pep1 3-5-0-1

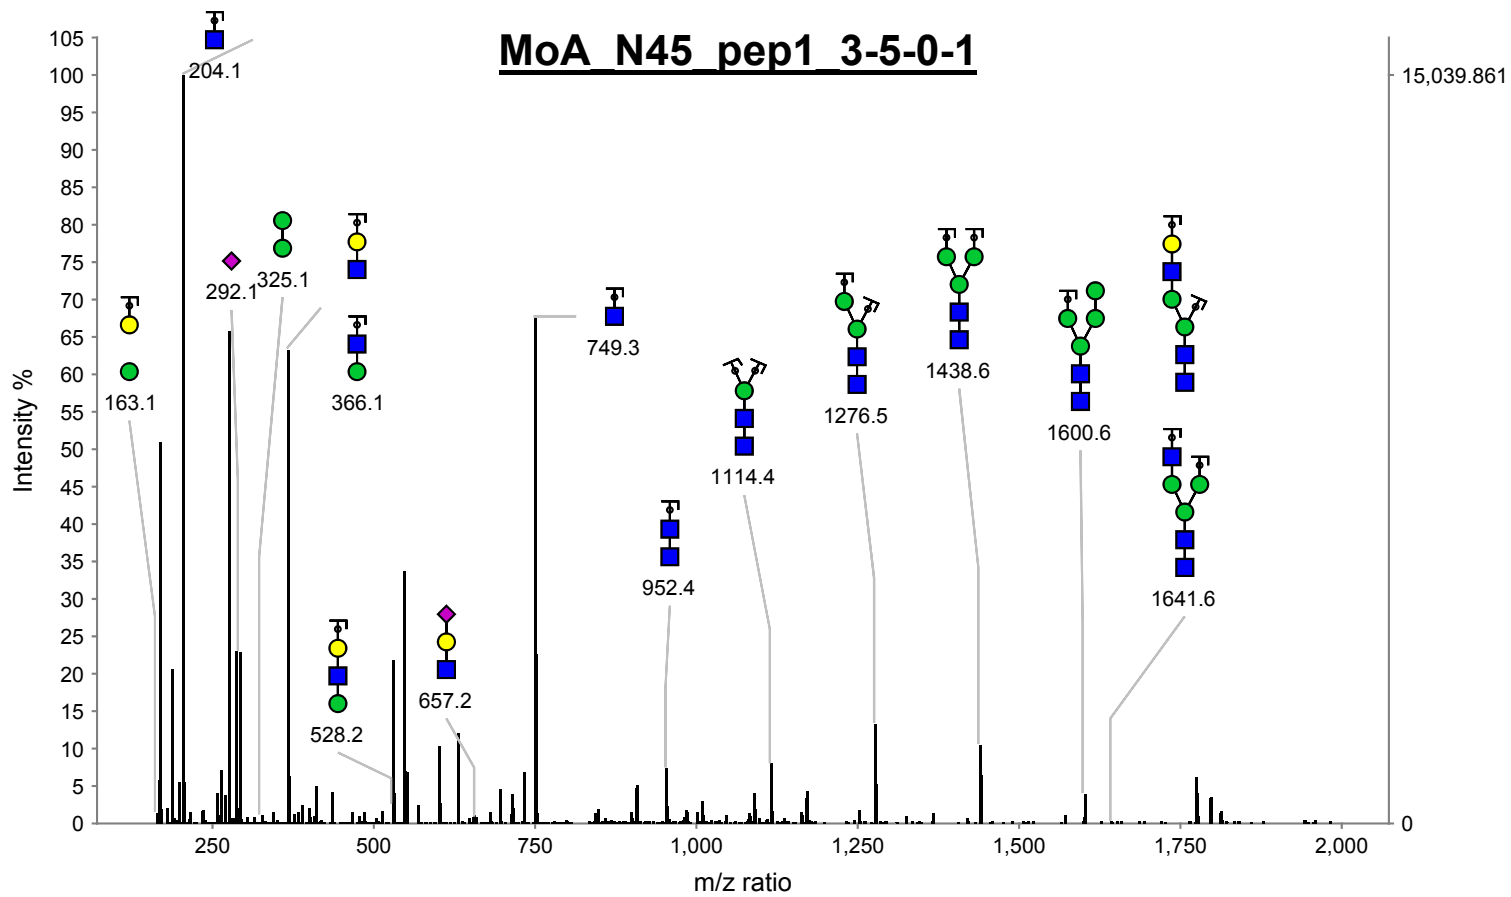



# MoA\_N45 pep1 3-5-1-1

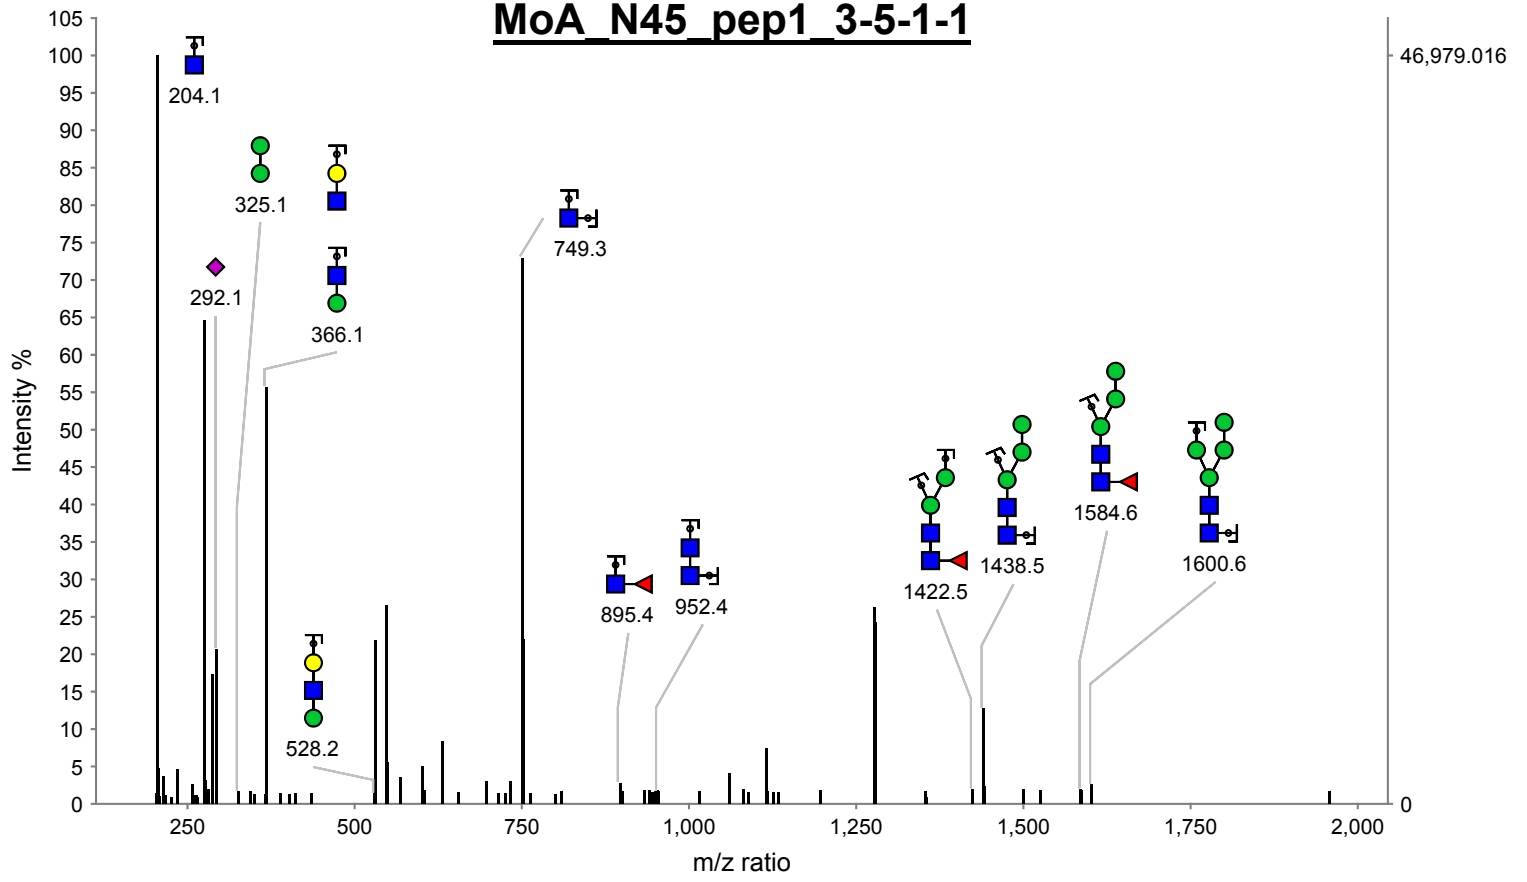

# MoA N45 pep1 3-6-0-1

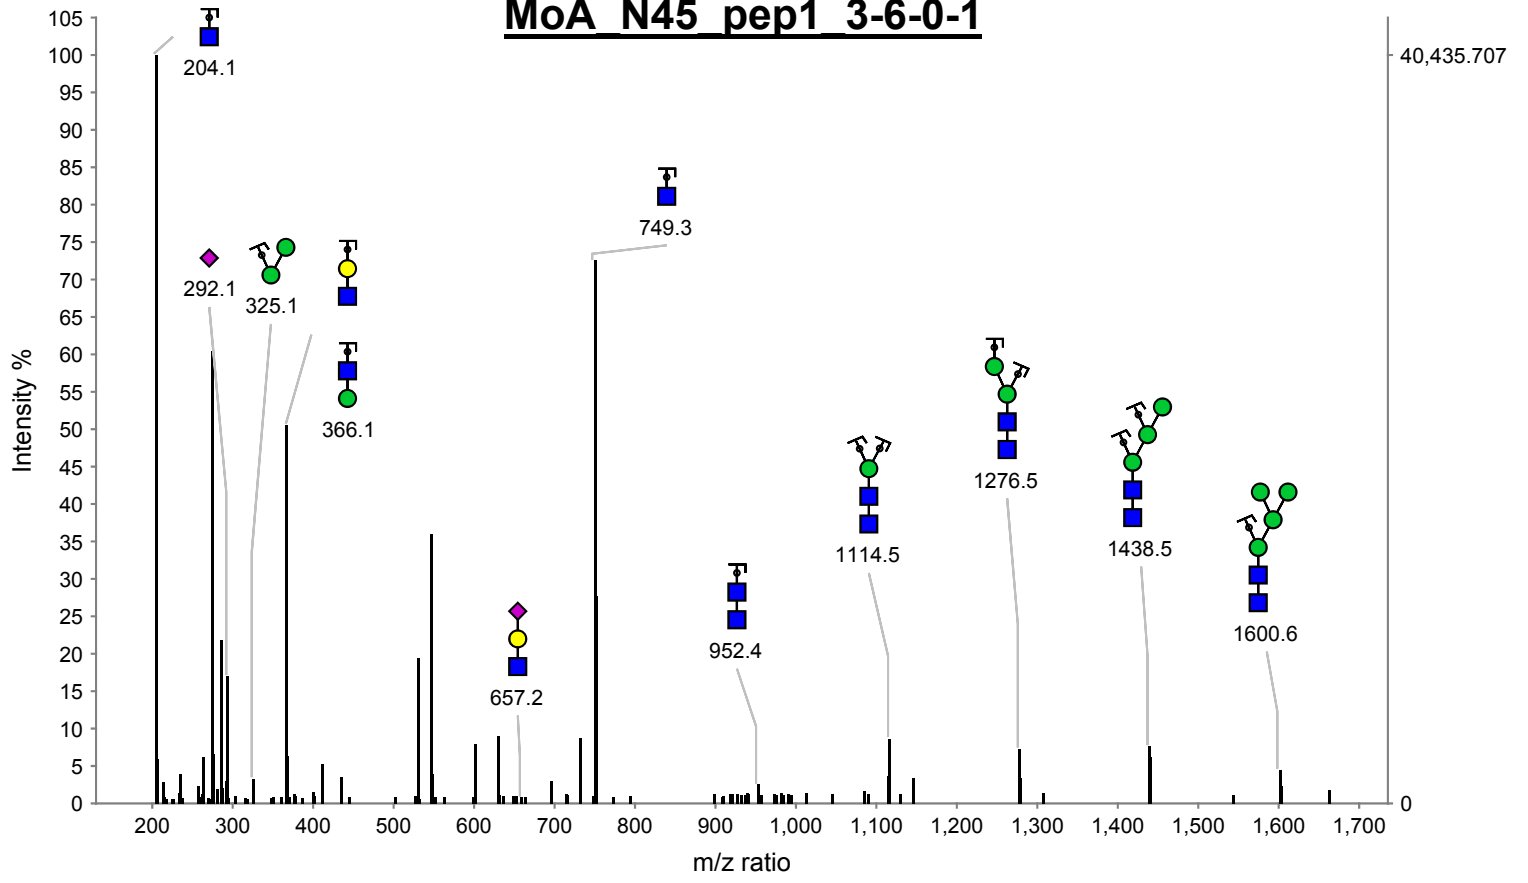

# MoA N45 pep1 4-5-0-1

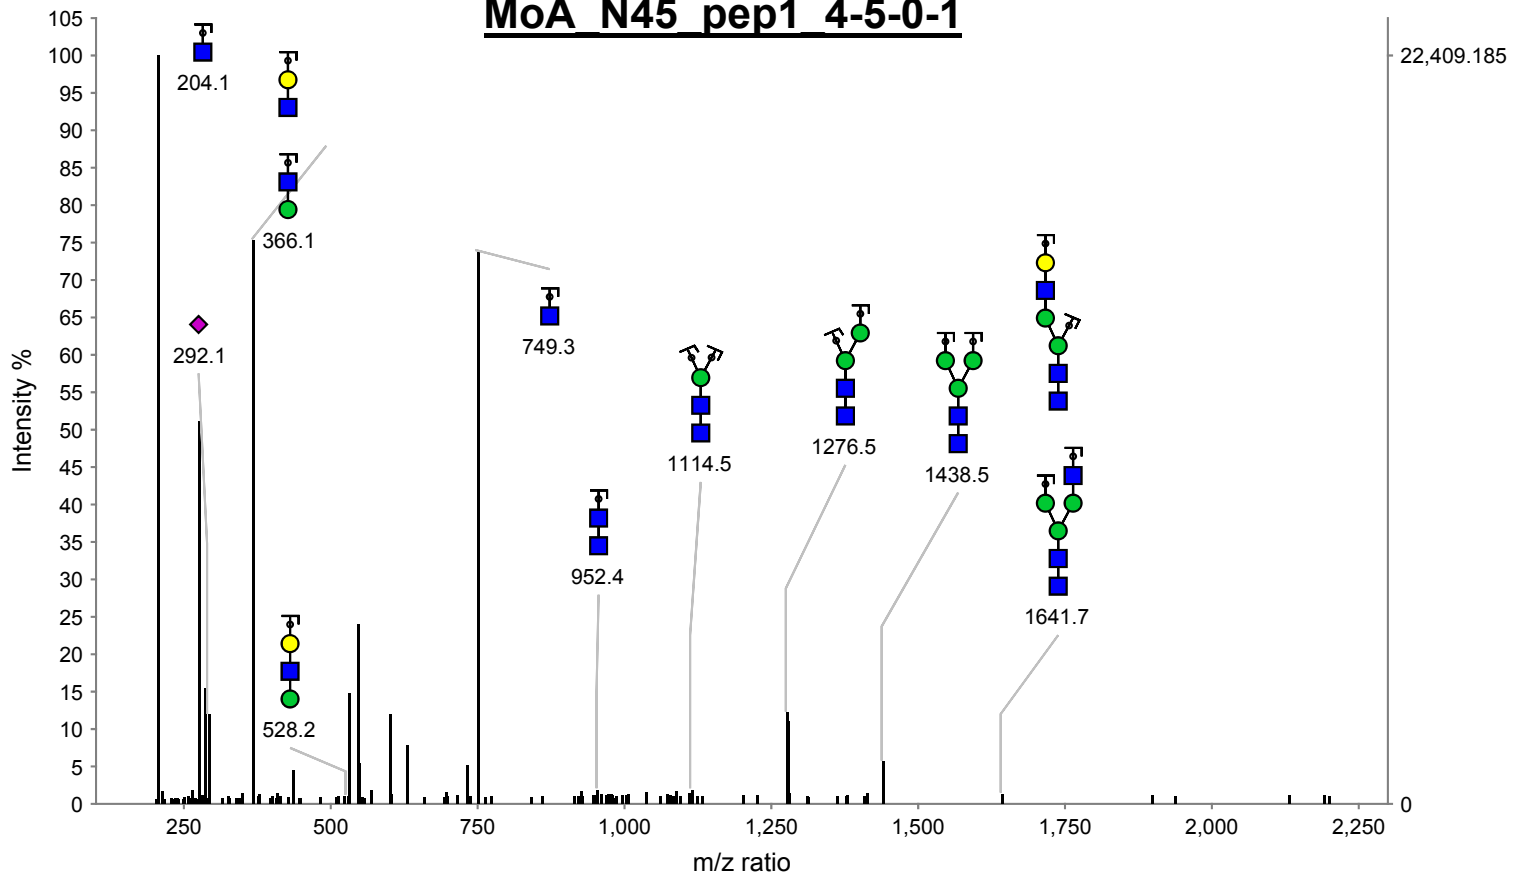

# MoA N45 pep1 5-6-0-1

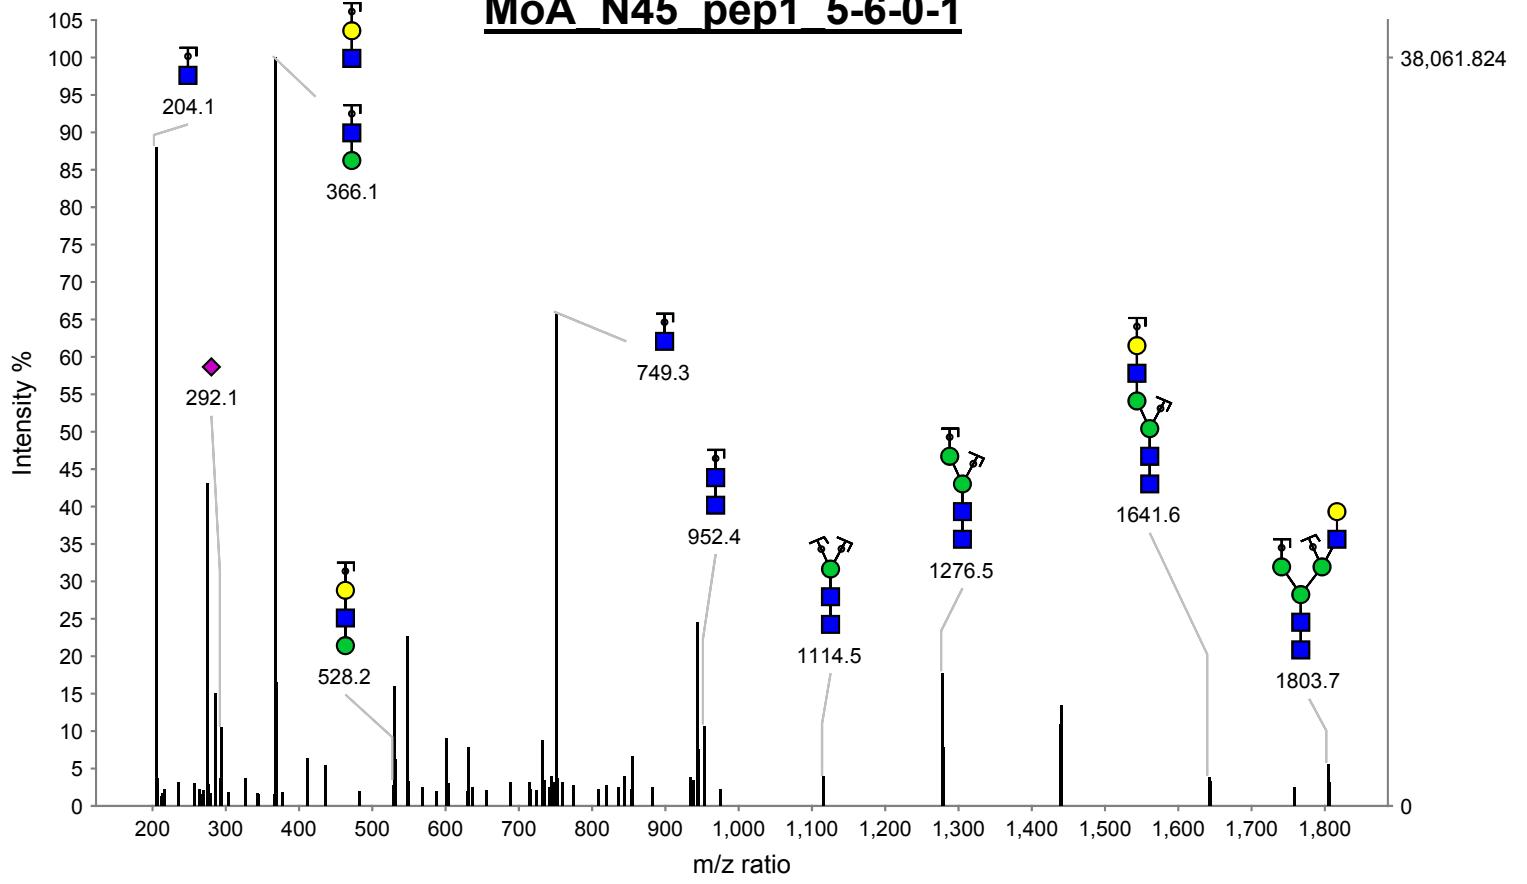

# MoA N45 pep1 6-7-0-1

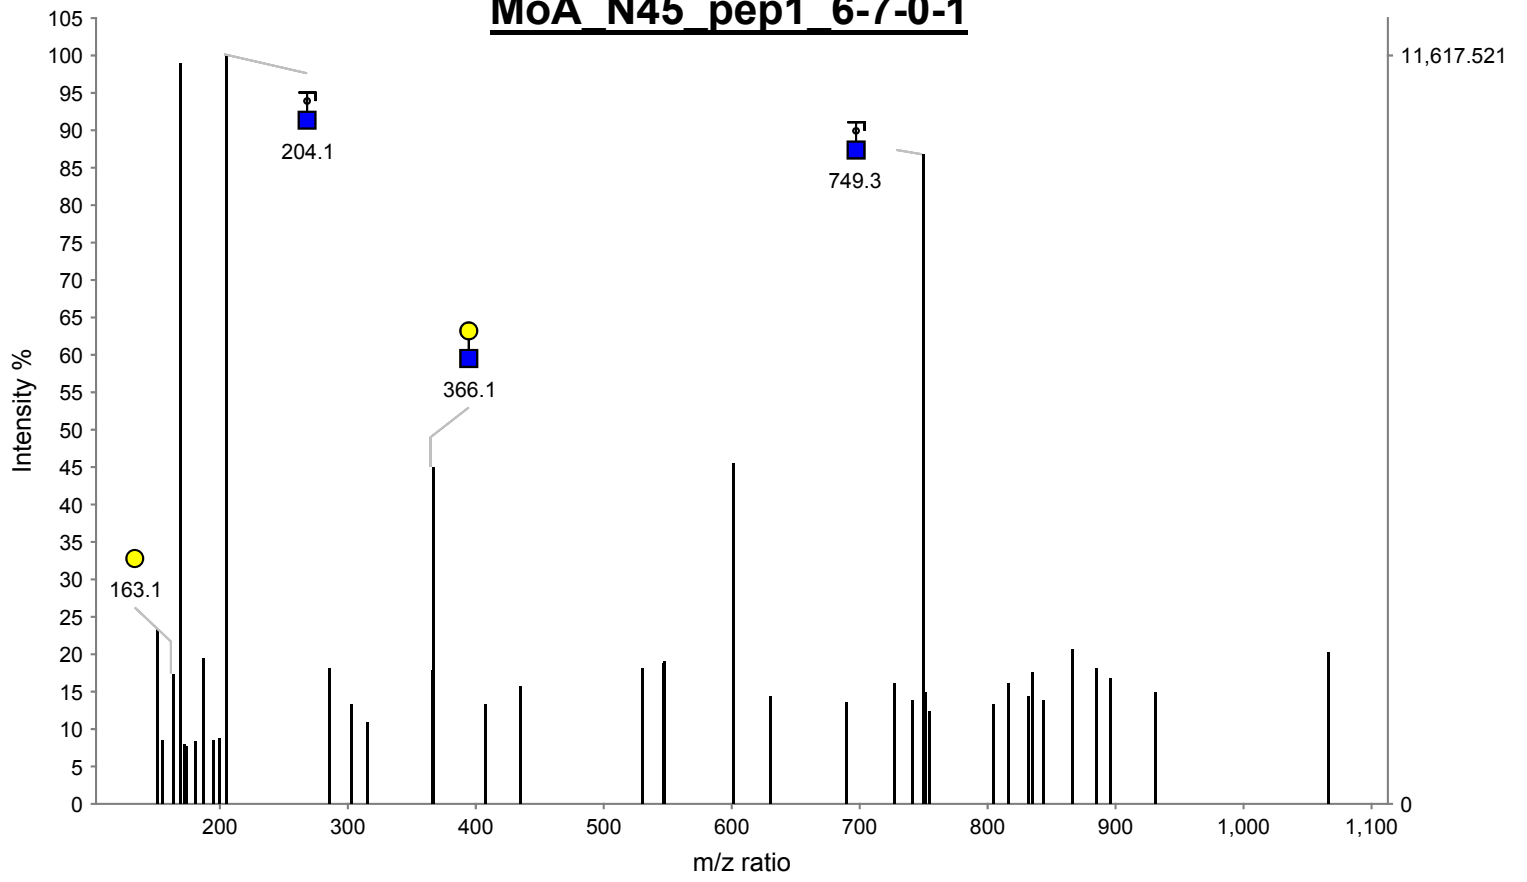

# MoA N45 pep1 6-7-0-2

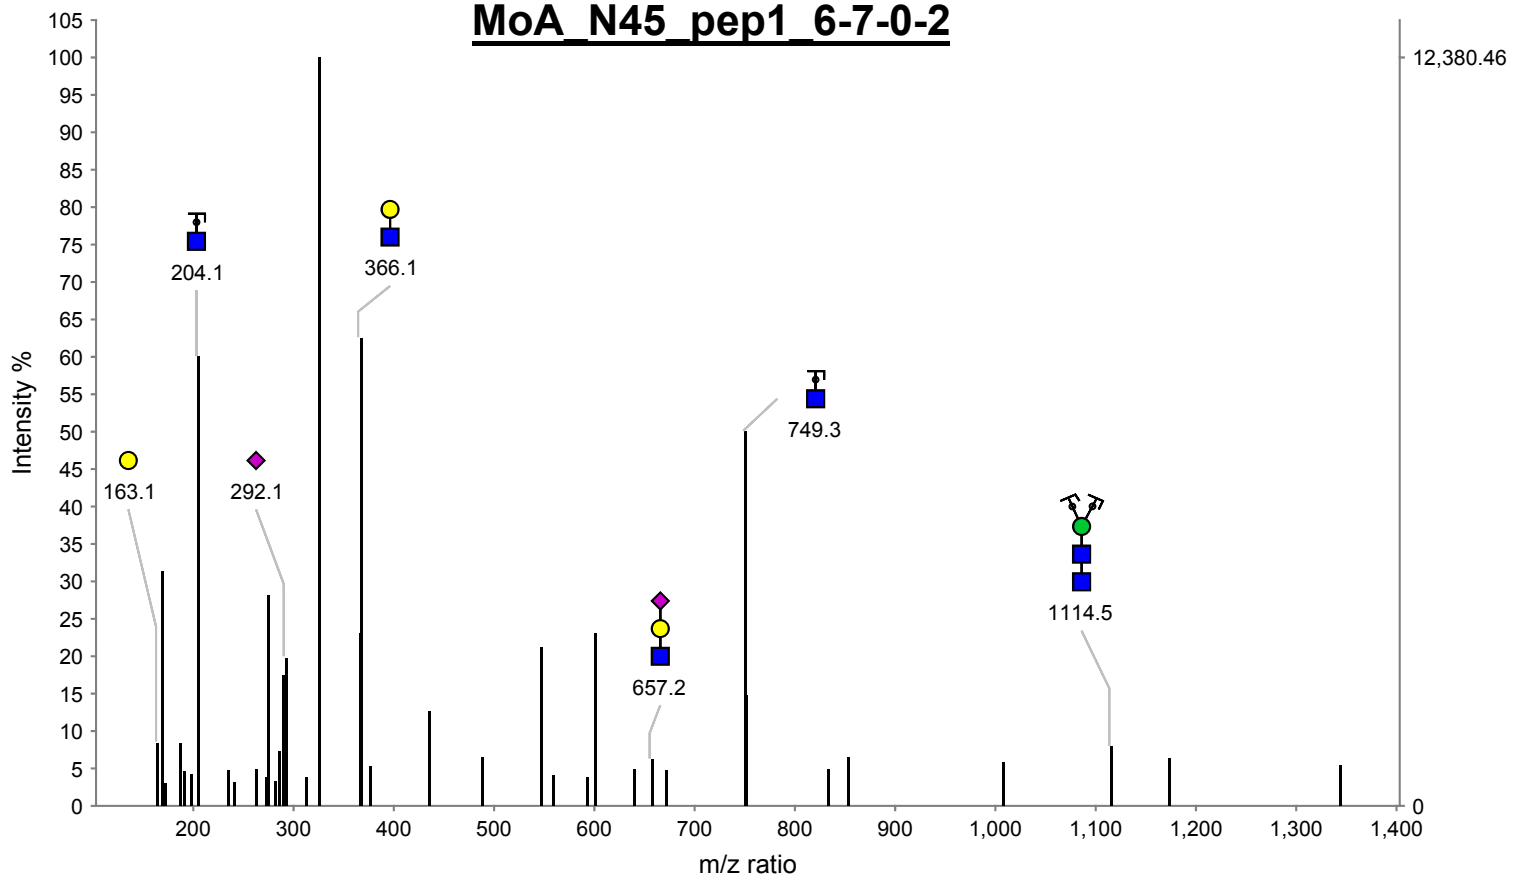

# MoA\_N45\_pep1\_7-8-0-2

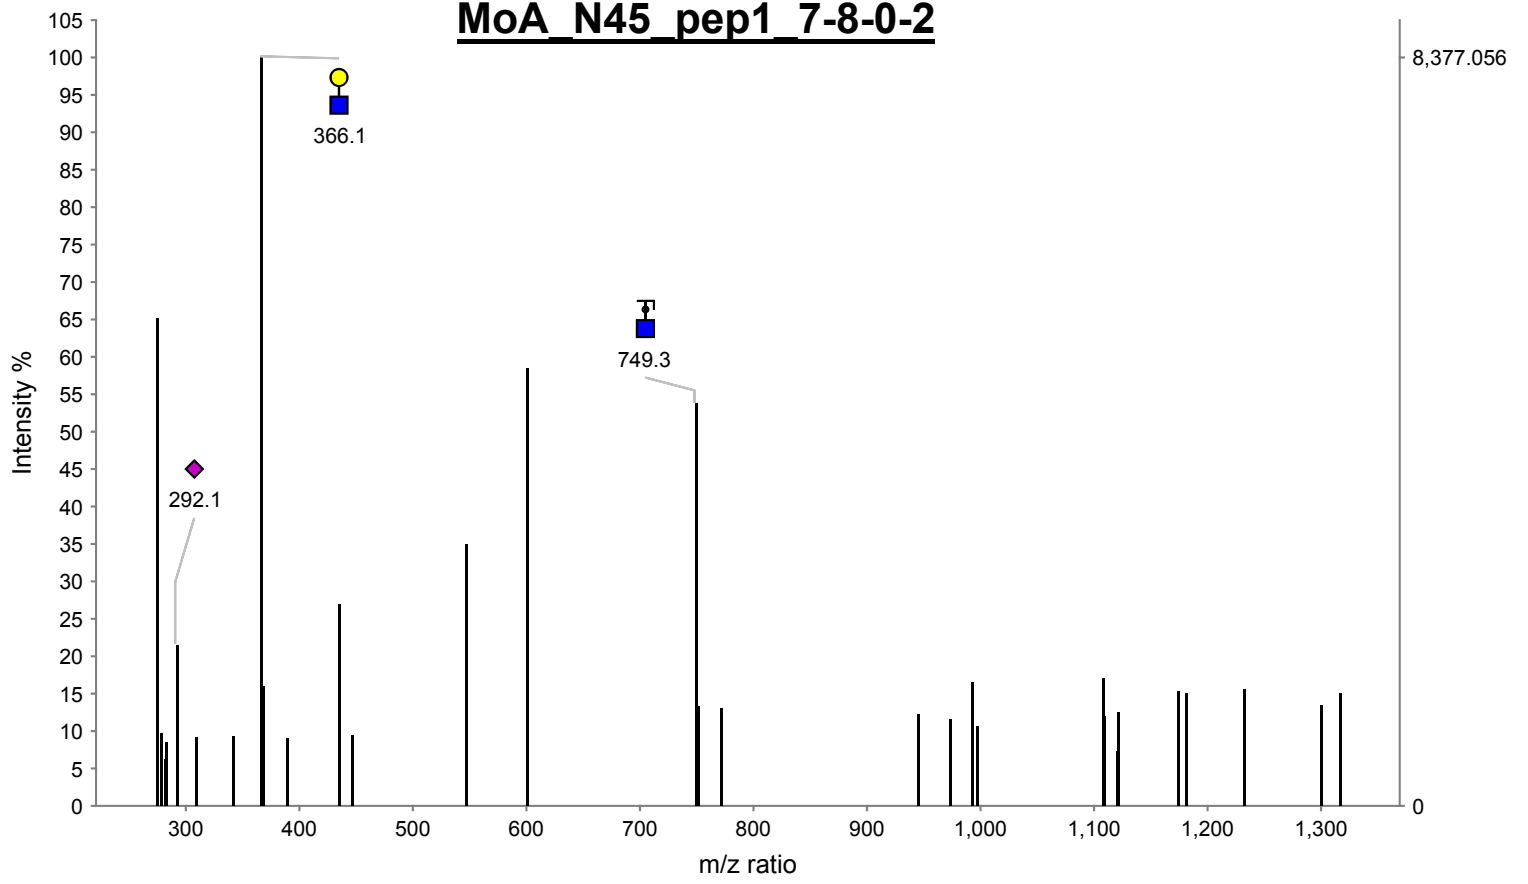

# MoA N45 pep2 2-9-0-0

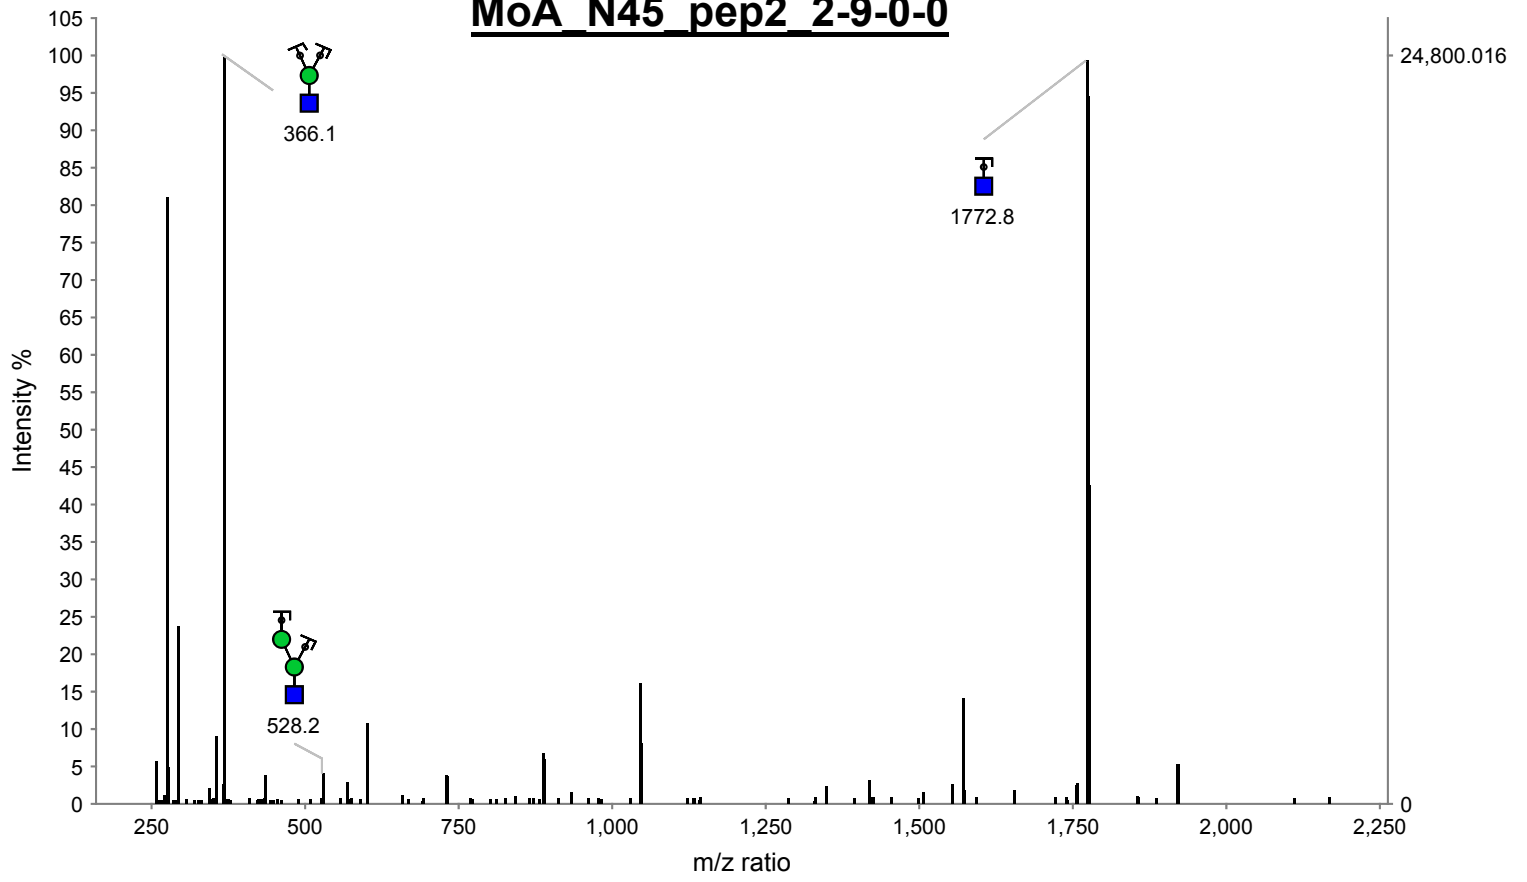



# MoA N45 pep2 3-4-0-1

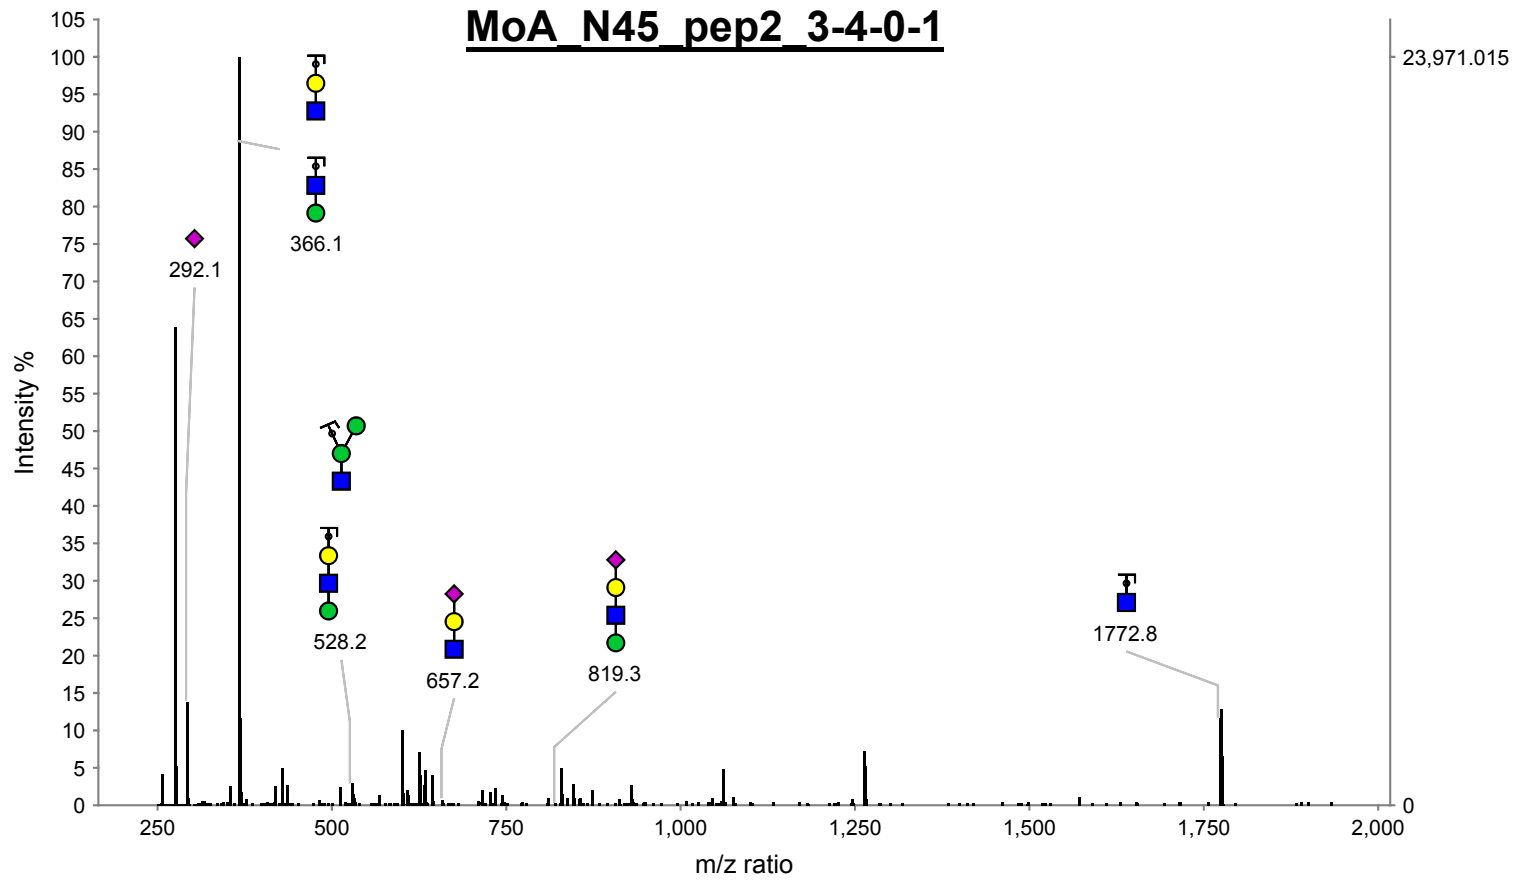

# MoA N45 pep2 3-4-1-1

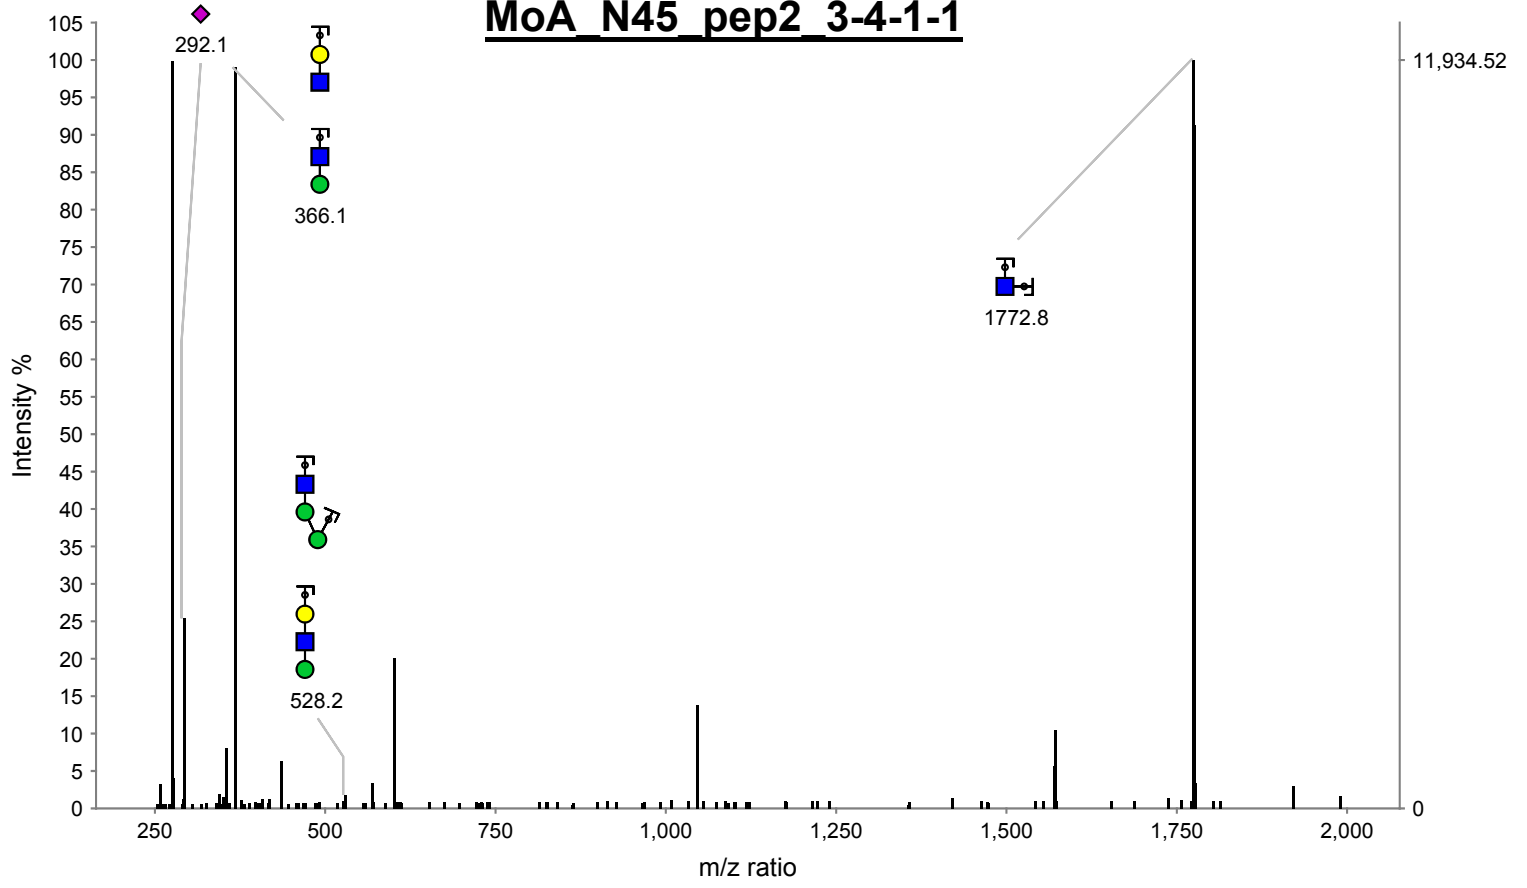

# MoA\_N45\_pep2\_3-) ! \$-1

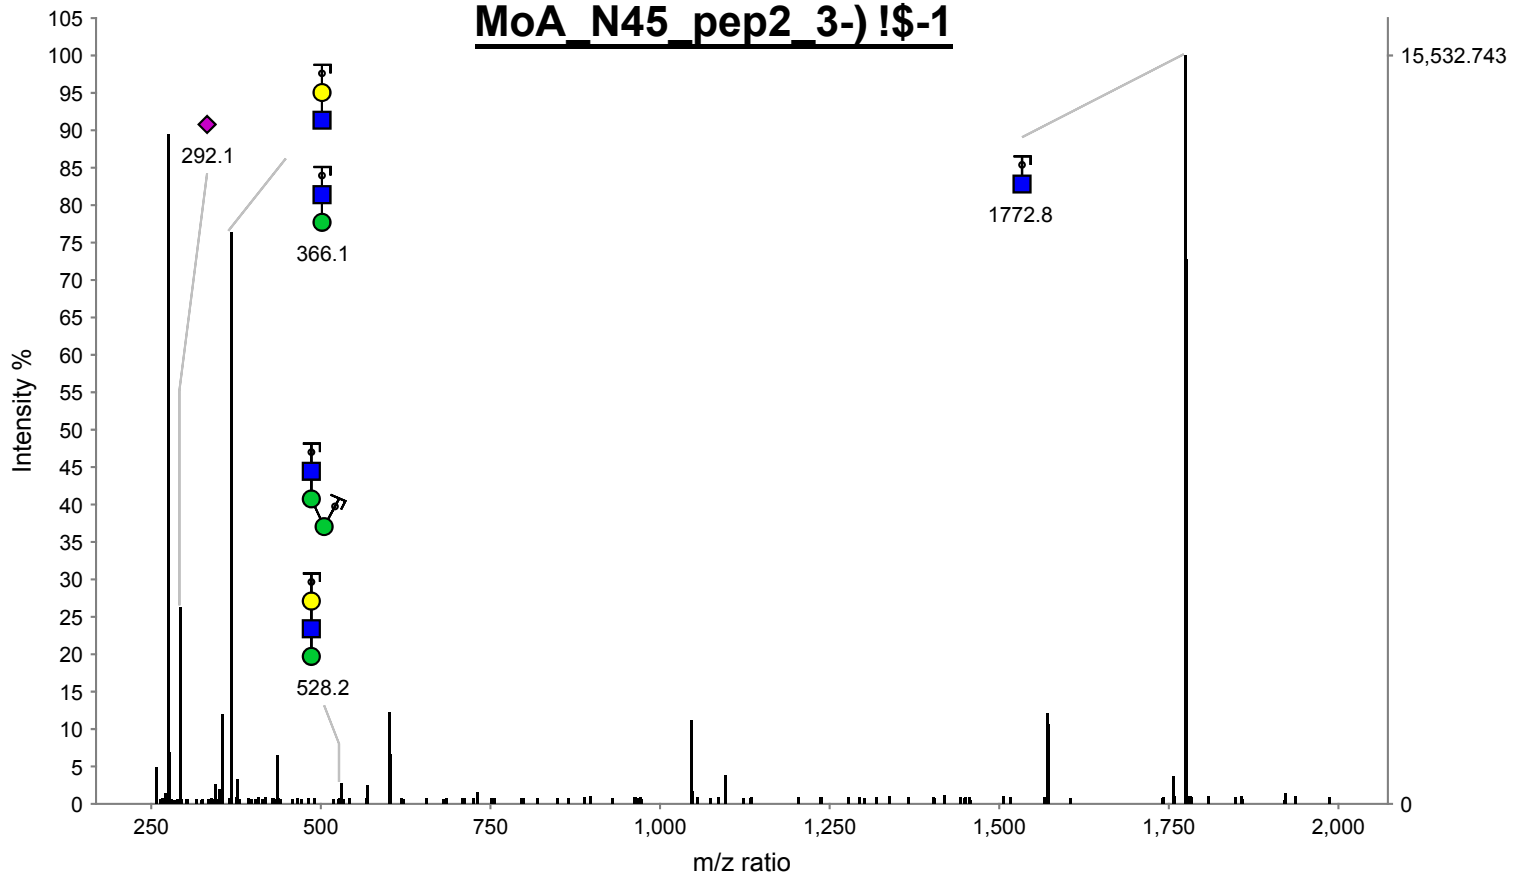

# MoA N45 pep2 3-) !1-1

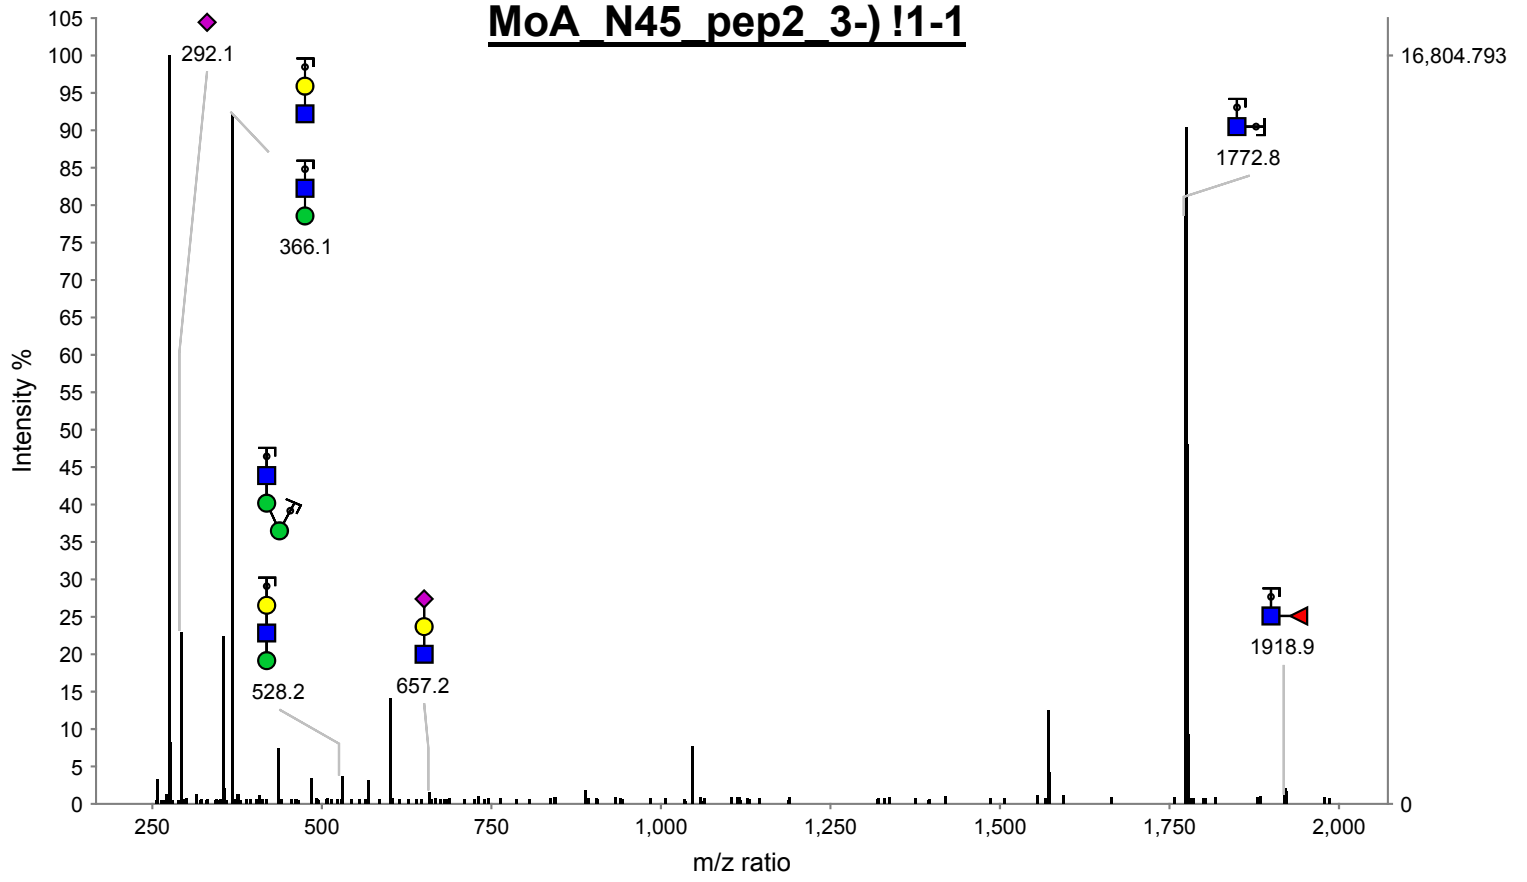

# MoA N45 pep2 3-6!\$-1

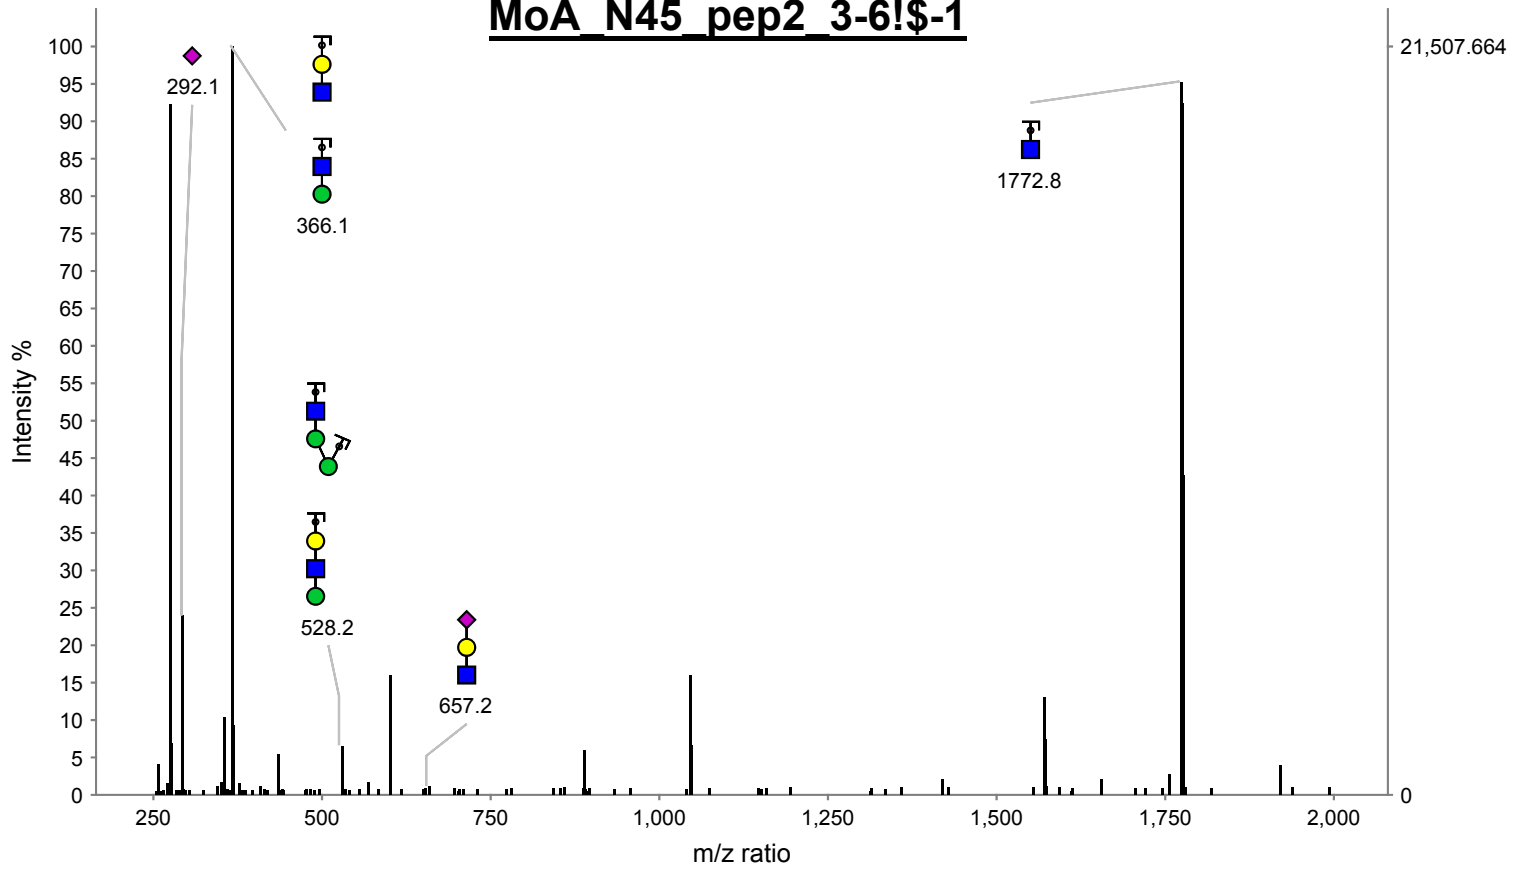

# MoA\_N45\_pep2\_3-6!1-1

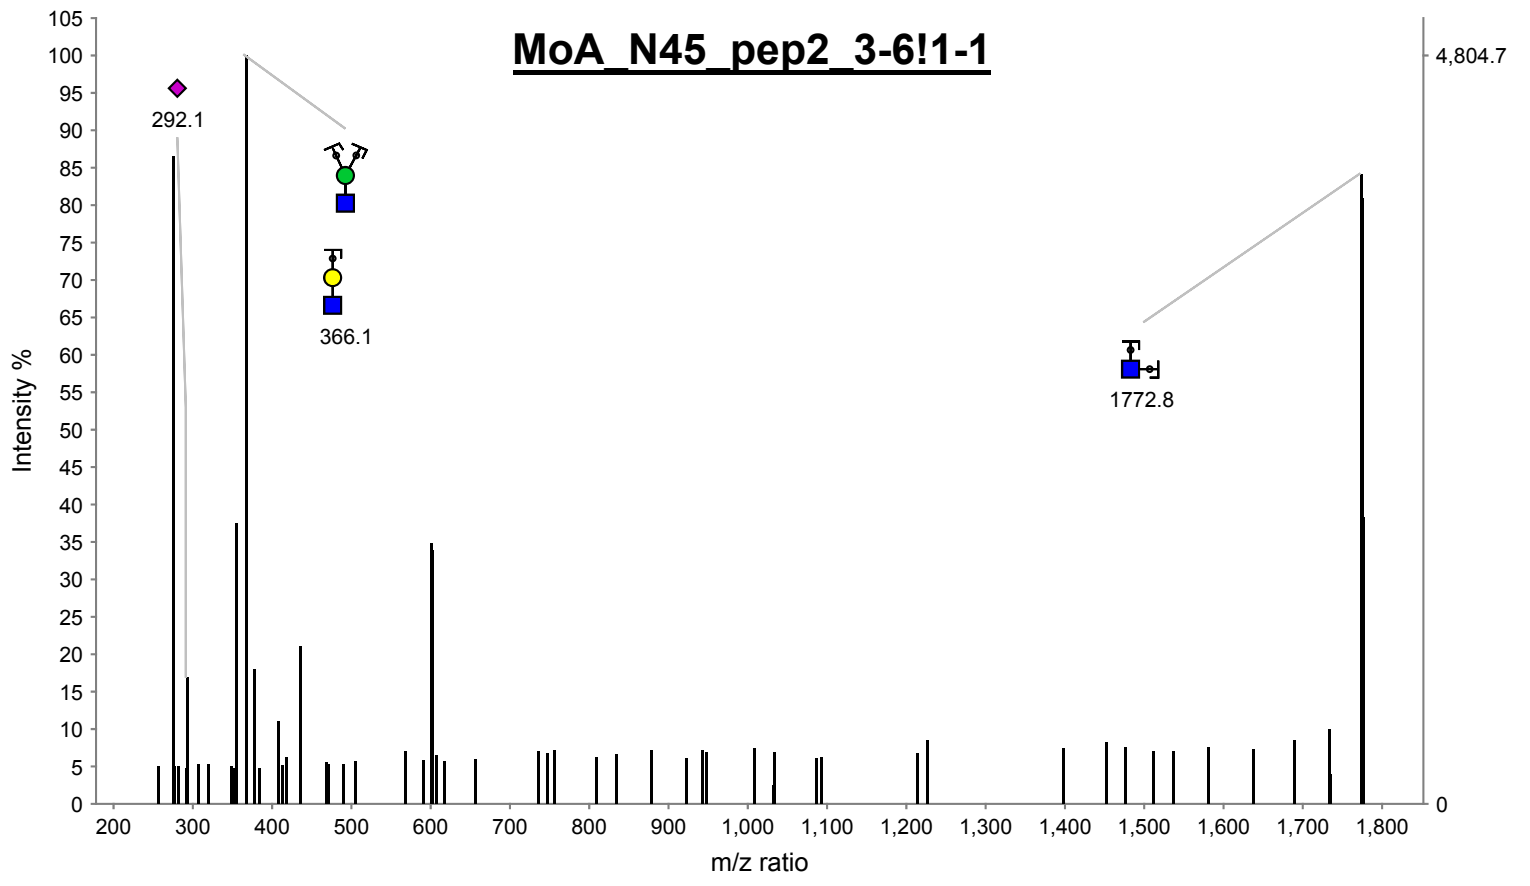

# MoA N45 pep2 3-7!\$-1

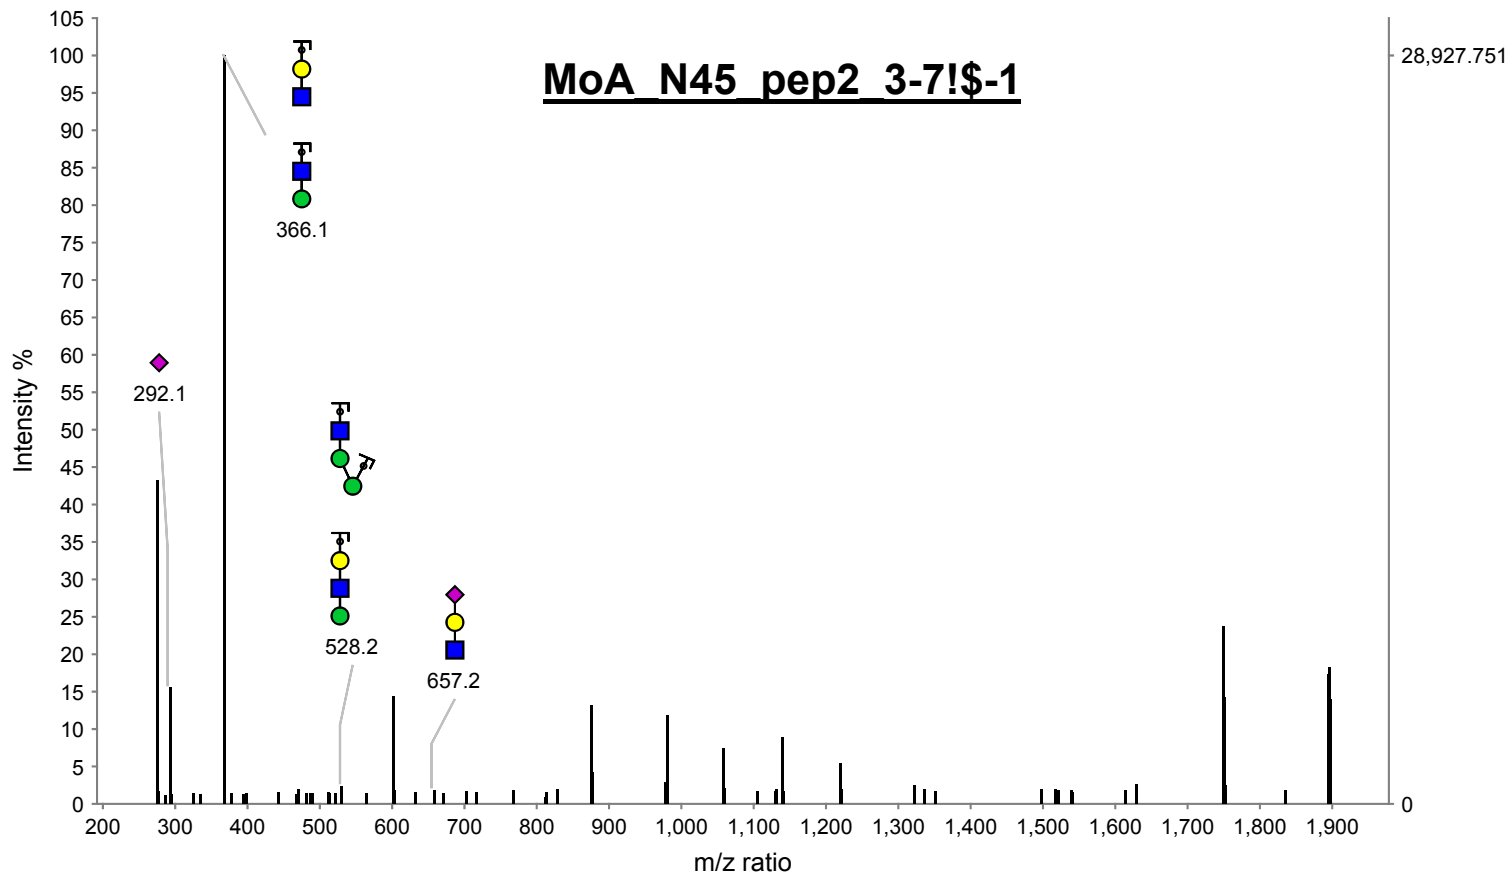

# MoA N45 pep2 4-5!\$-1

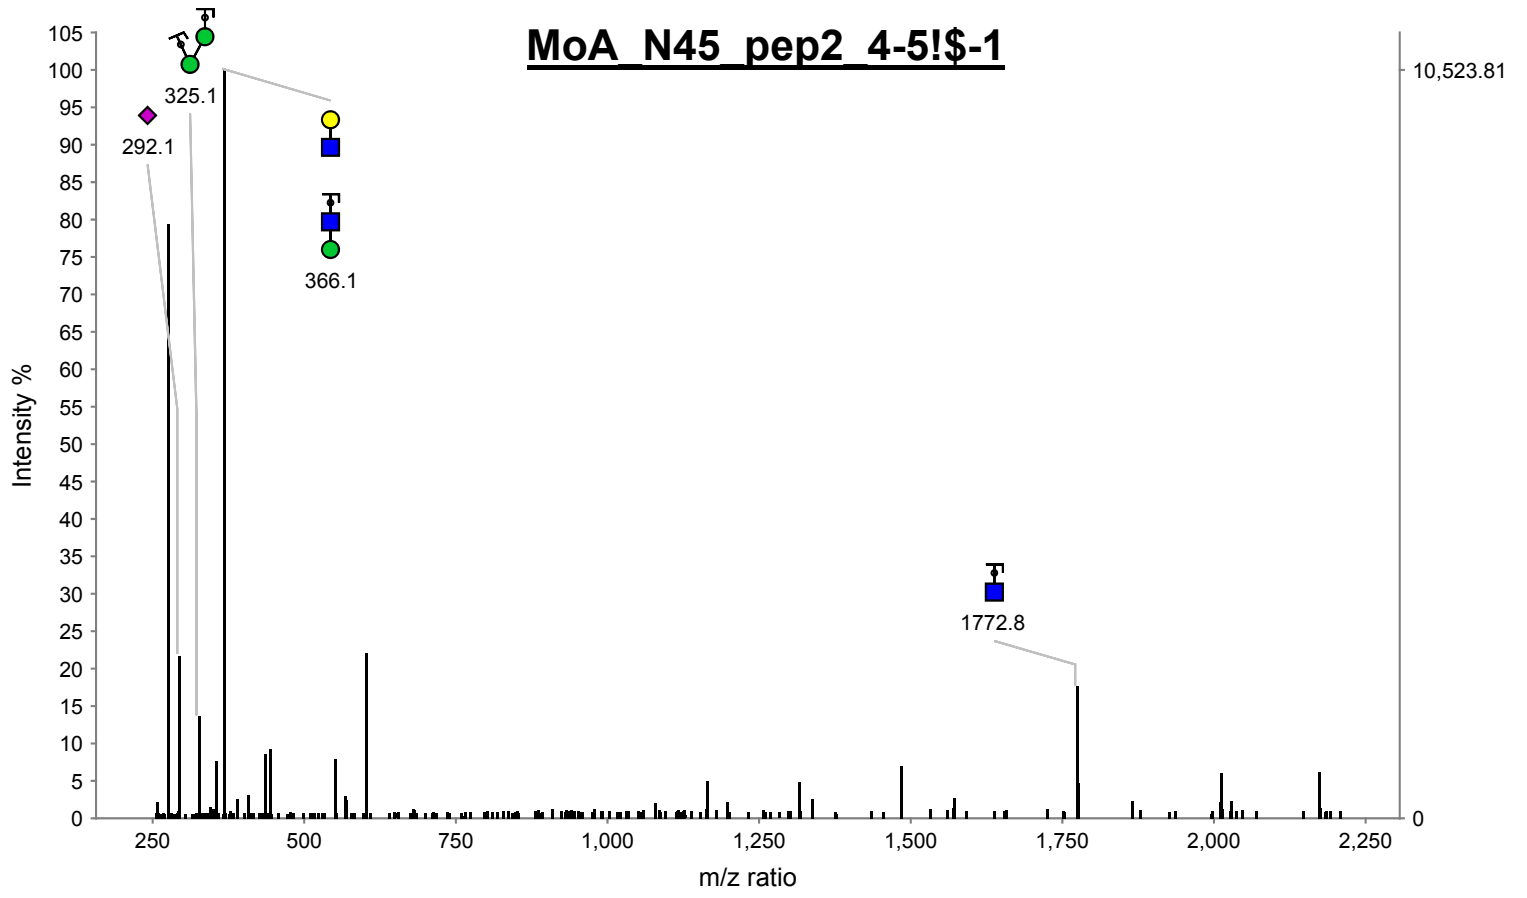



# MoA N45 pep2 4-5-1-1

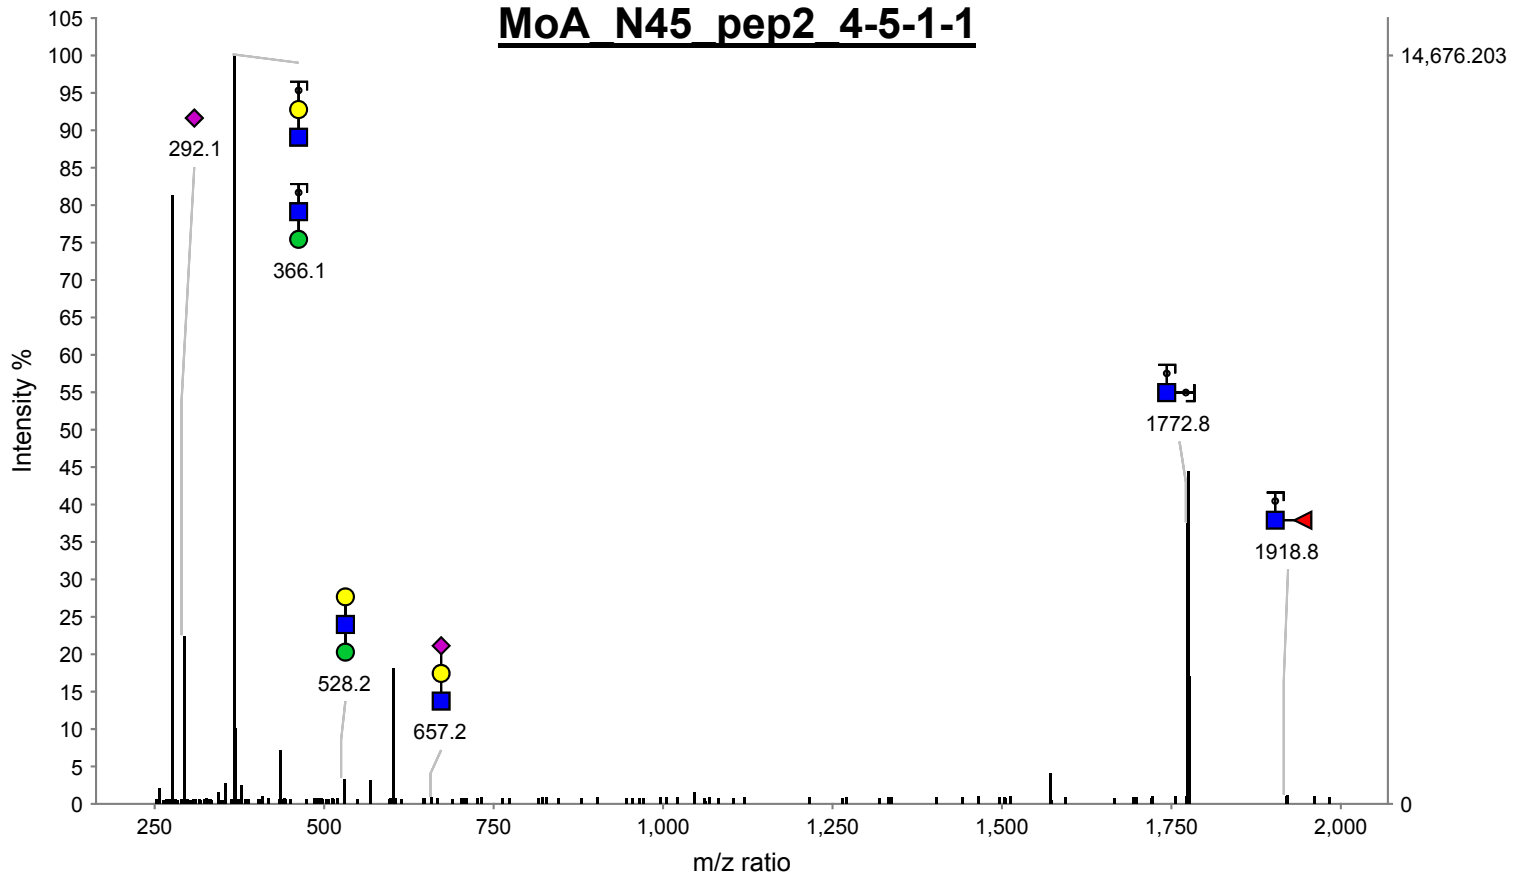

# MoA N45 pep2 4-5-1-2

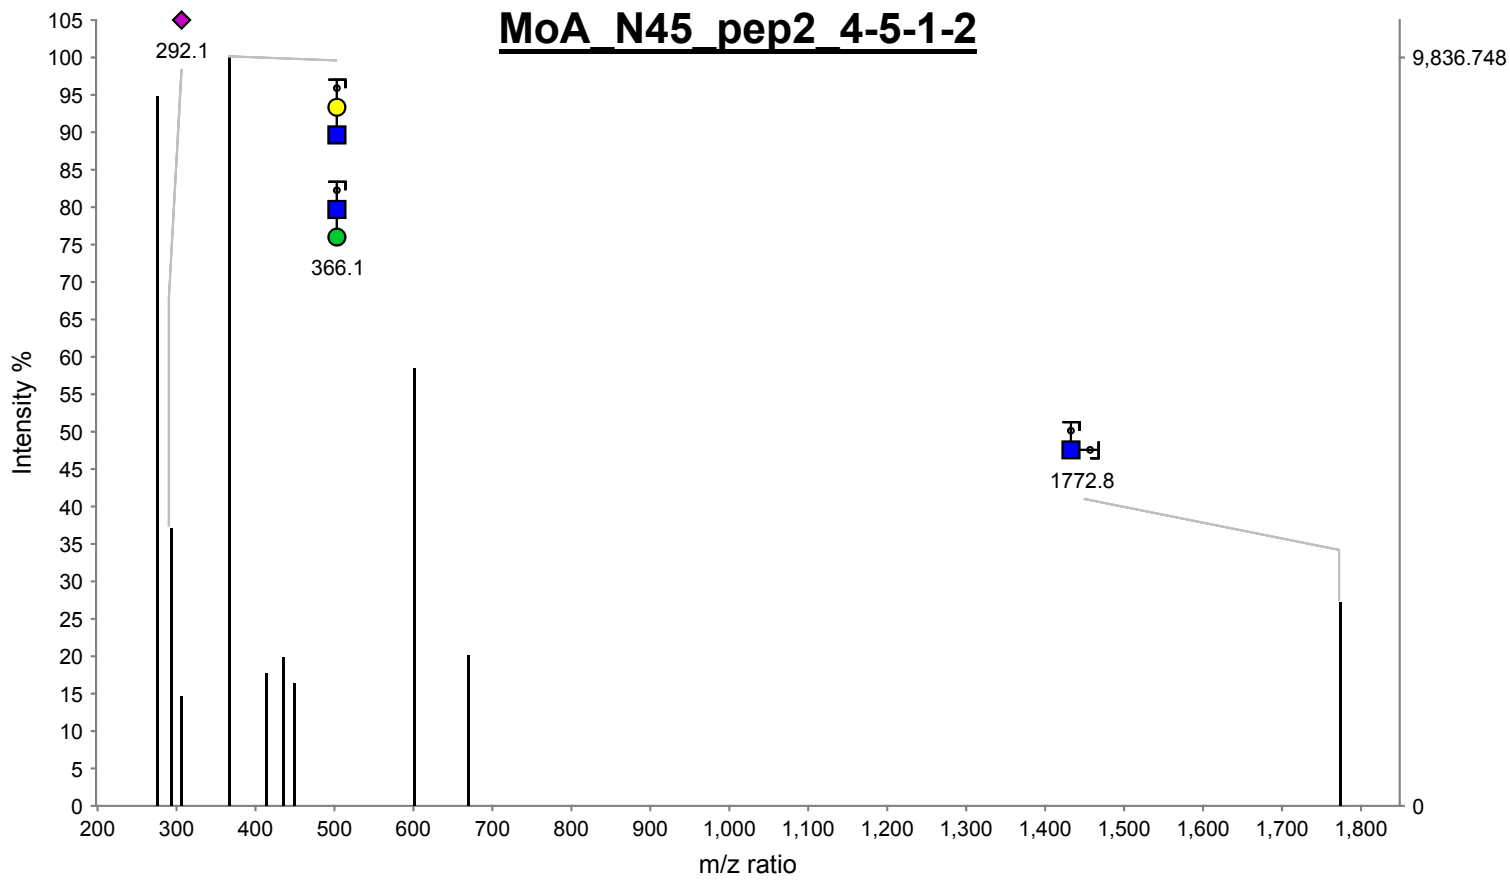

# MoA N45 pep2 5-6-0-1

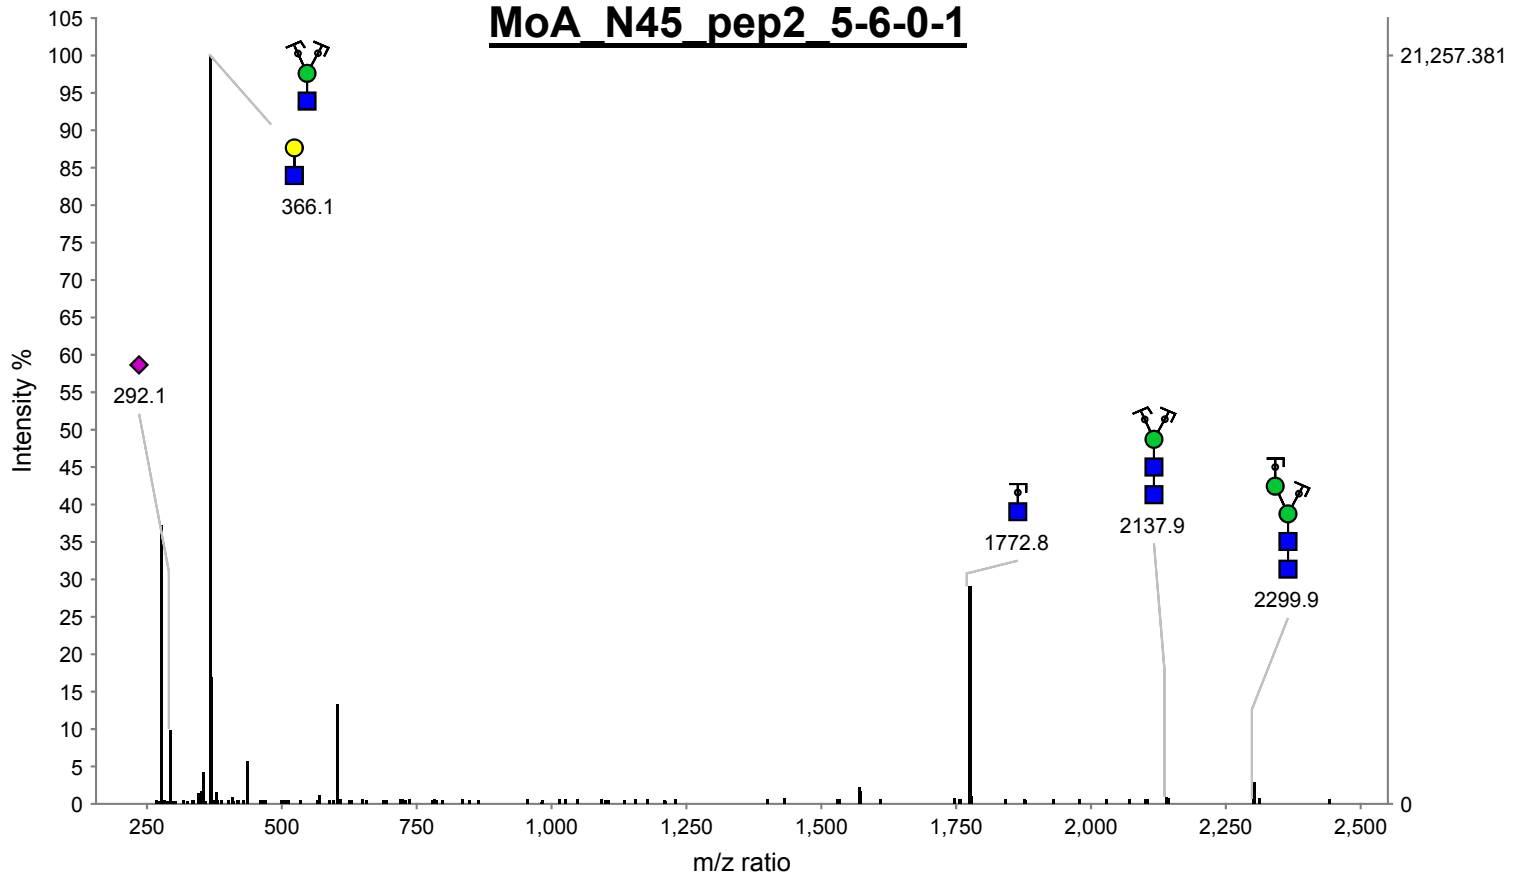

# MoA\_N45\_pep2\_5-6-1-1

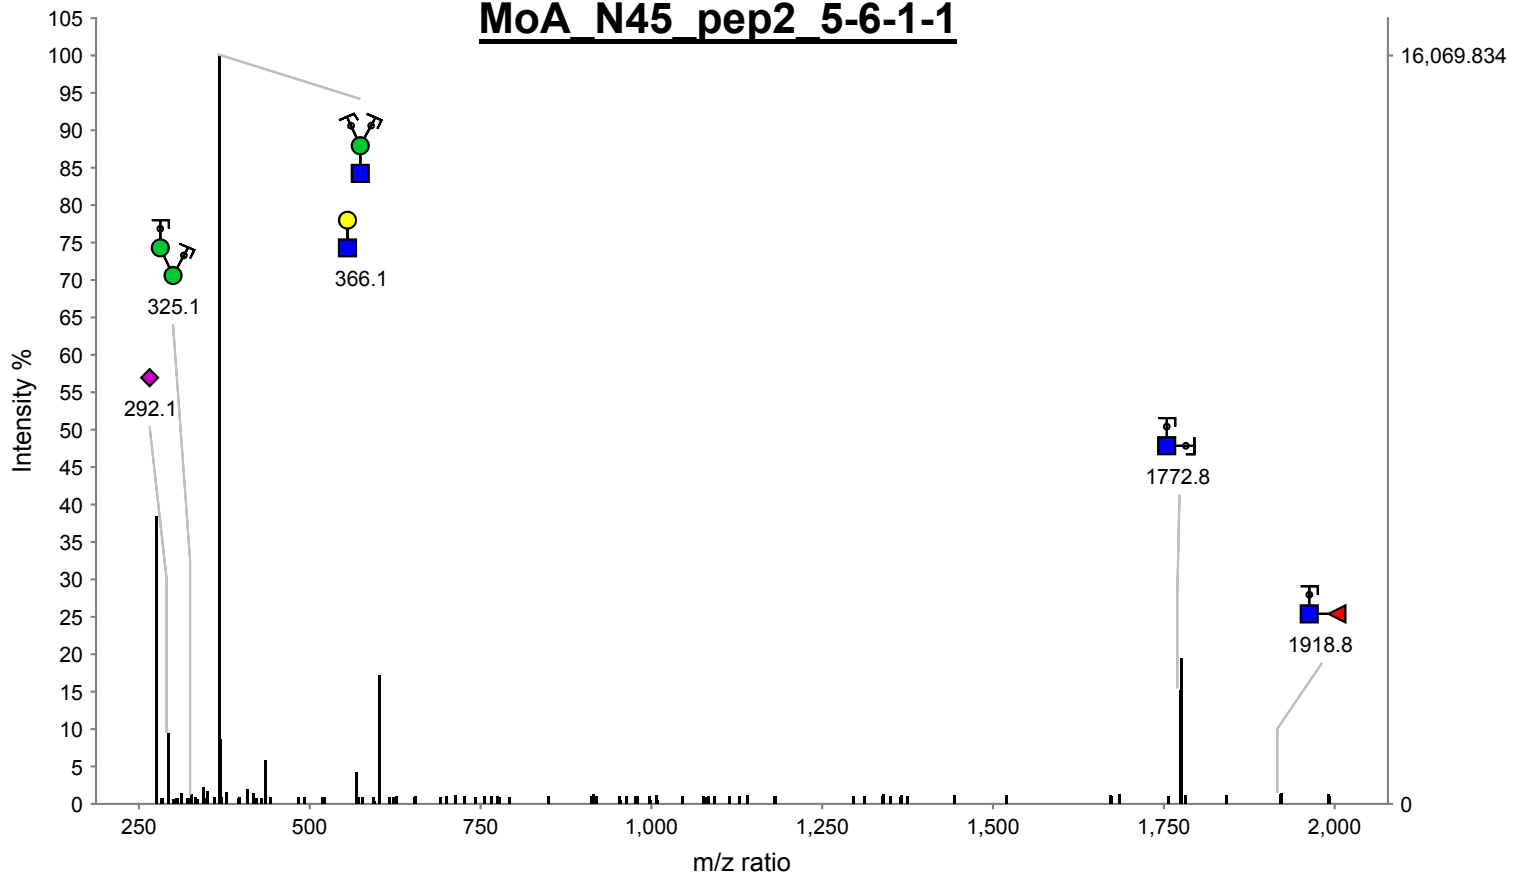

# MoA\_N45\_pep2\_6-7-0-1

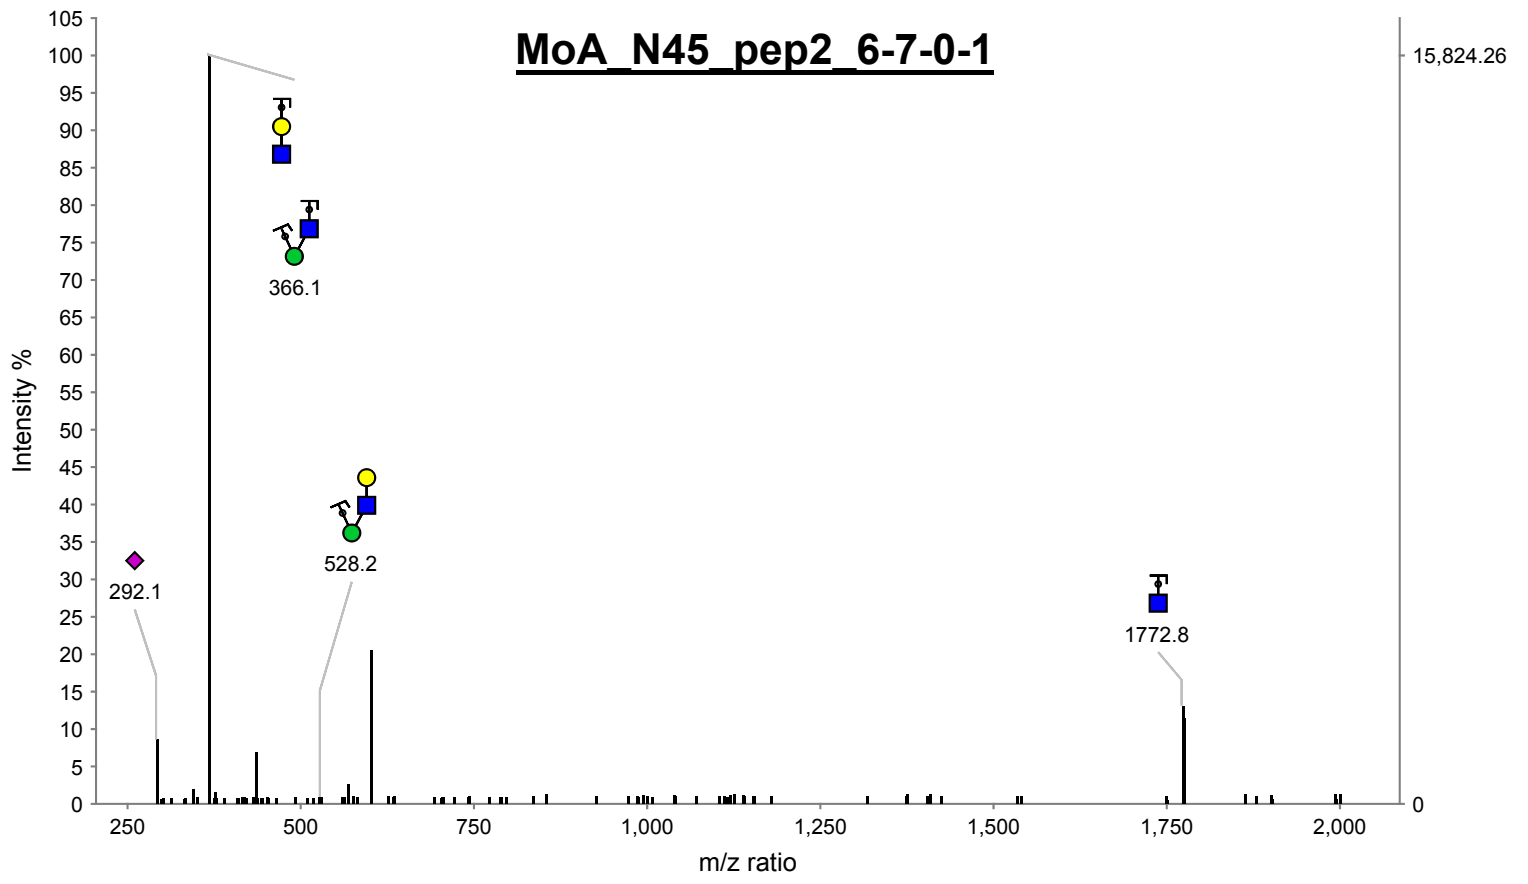

# MoA N162 pep1 2-3-1-0

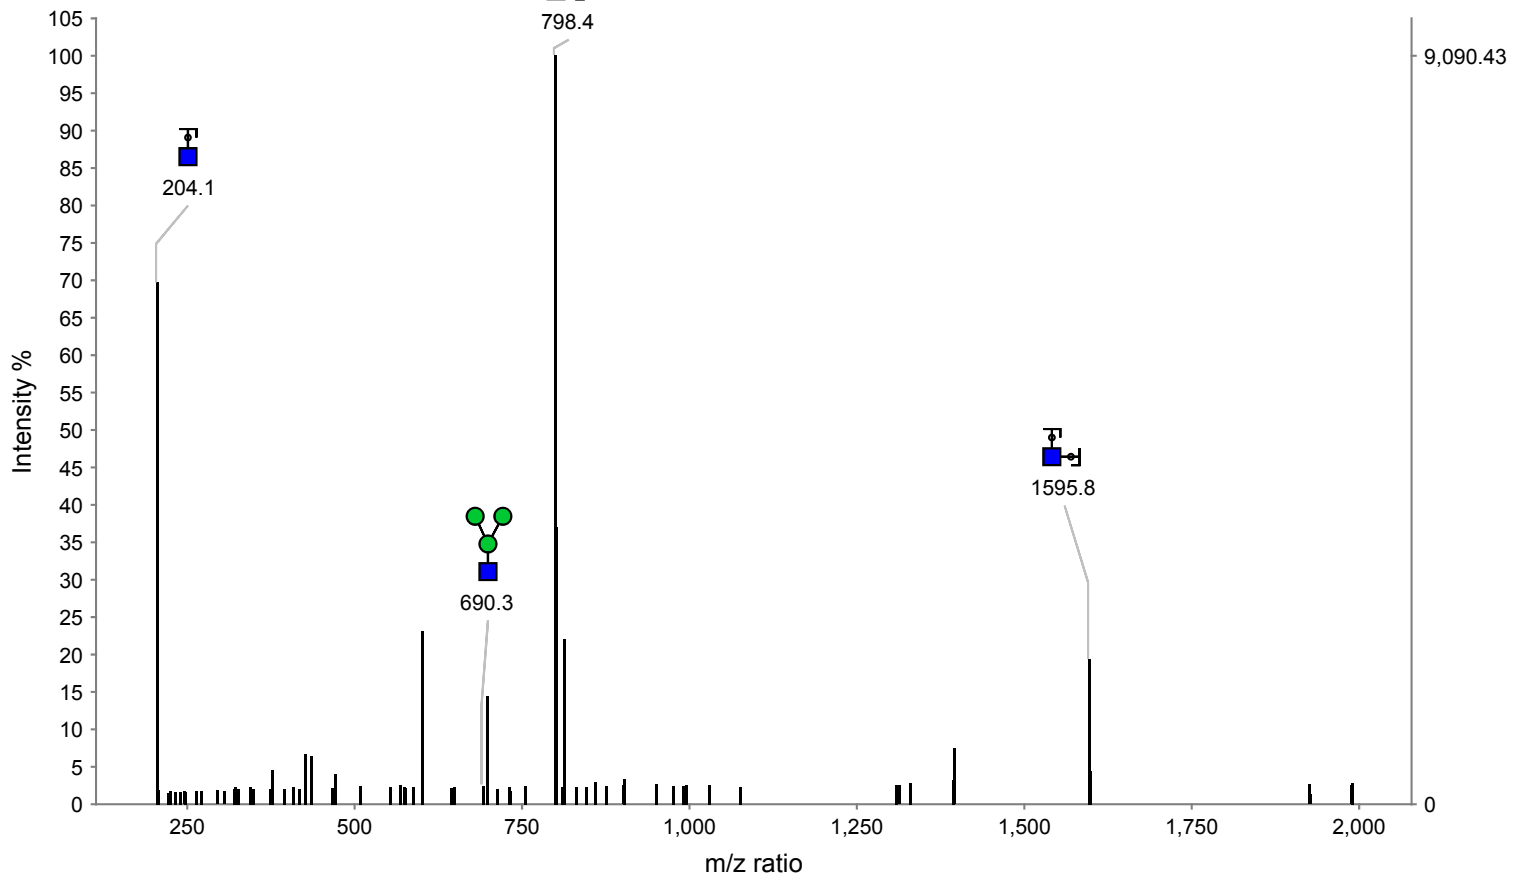

# MoA\_N162\_pep1\_2-5-0-0

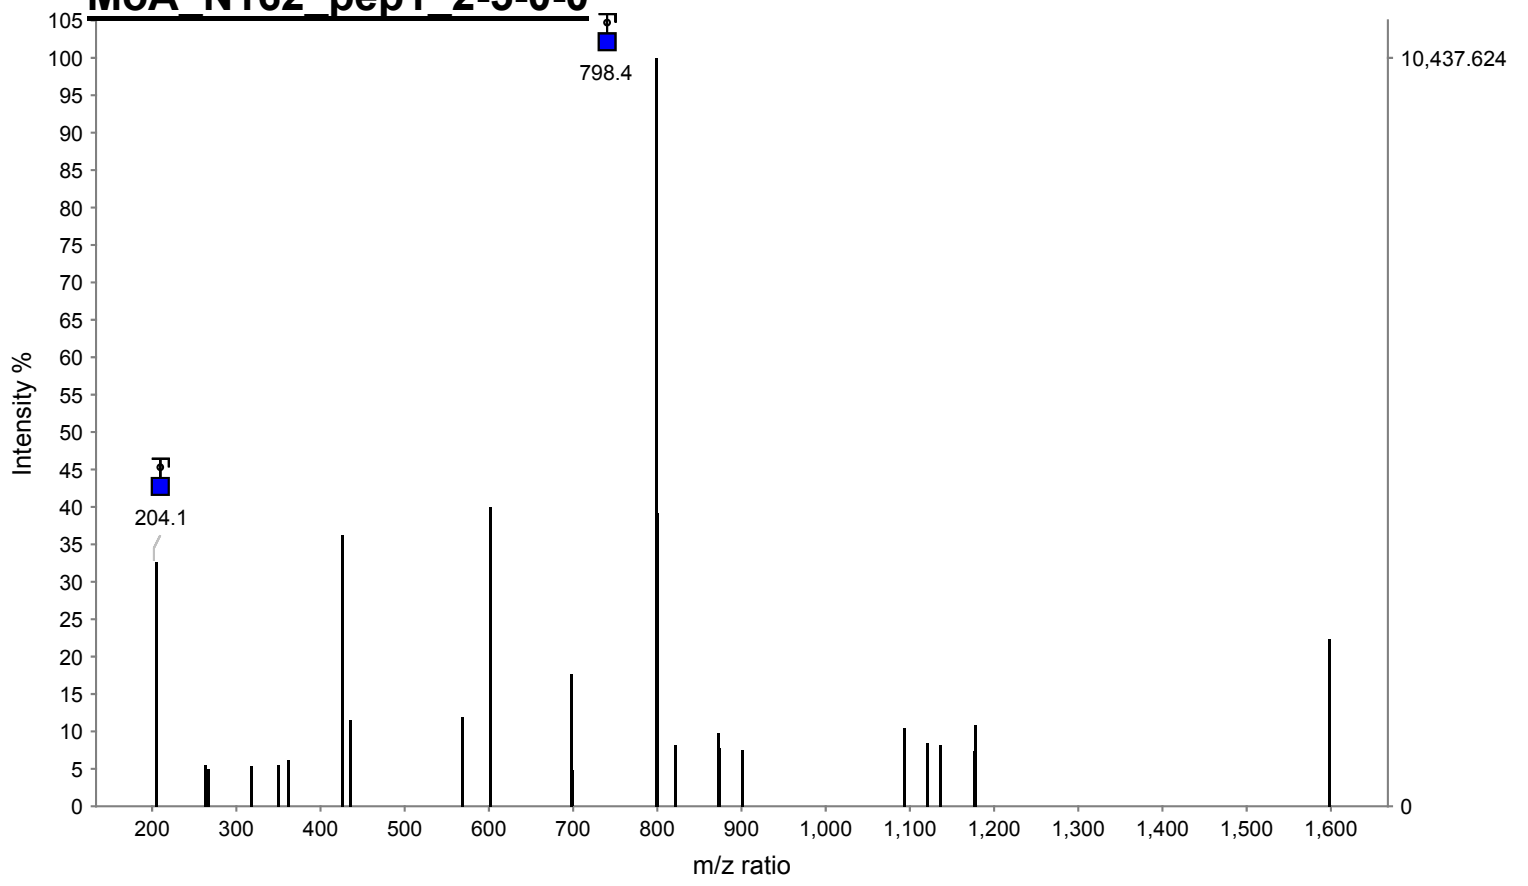

# MoA\_N162\_pep1\_2-6-0-0

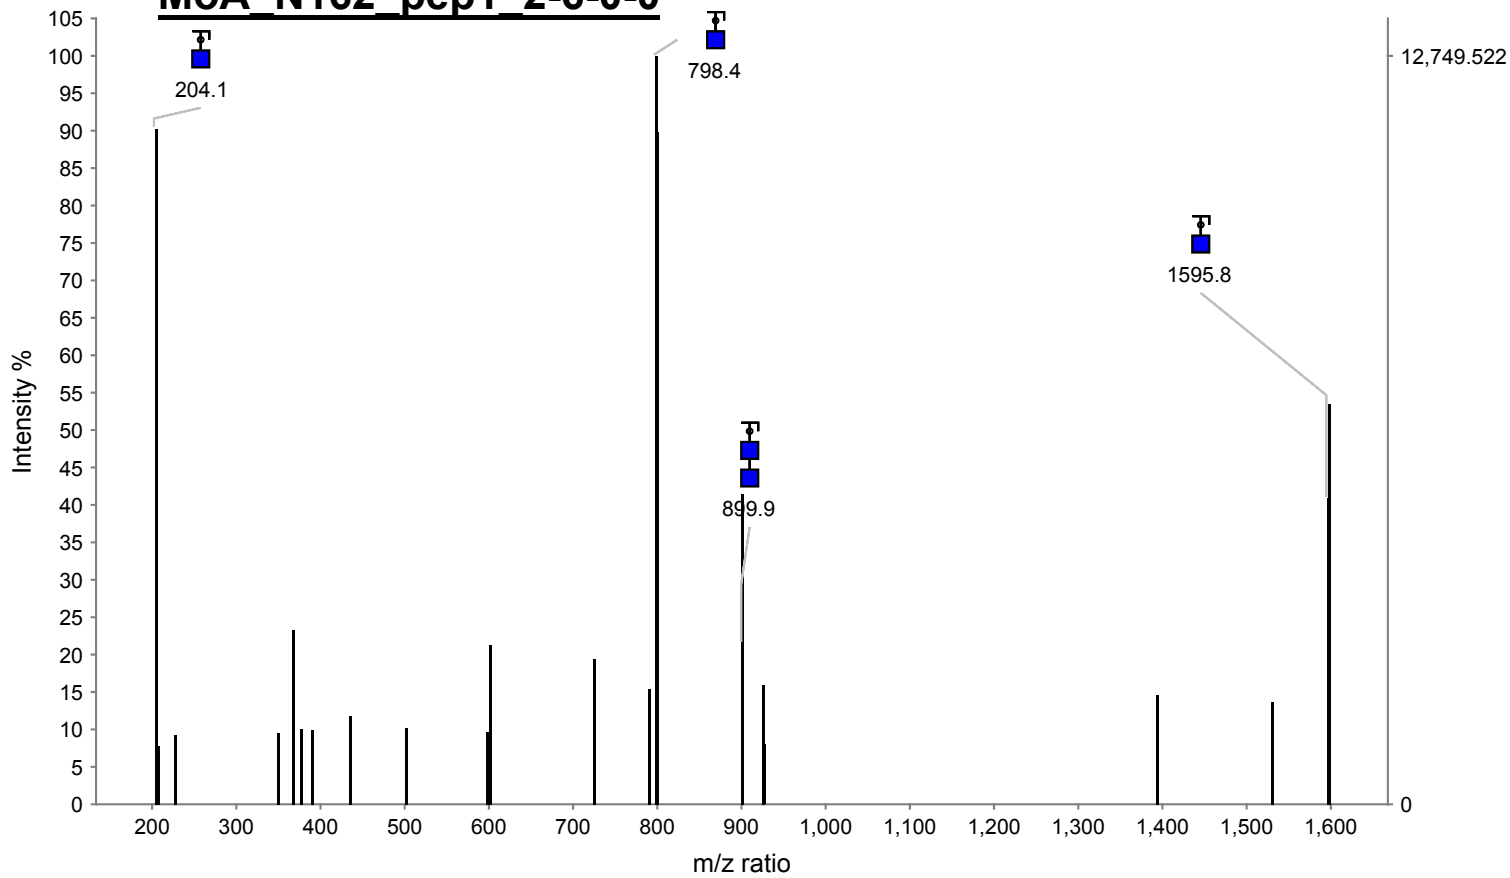



# MoA N162 pep1 2-7-0-0

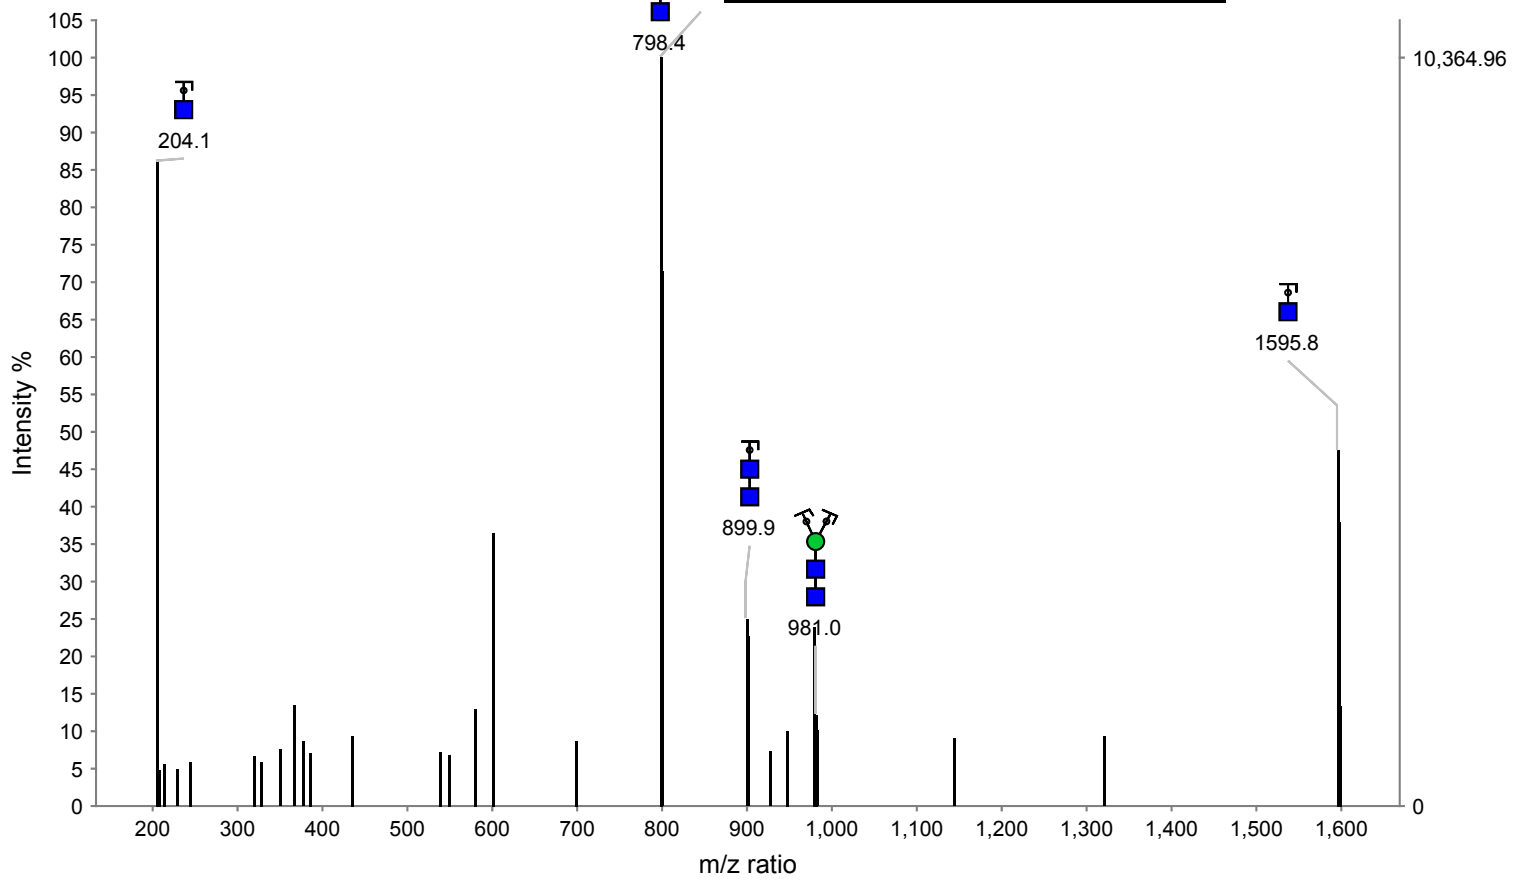

# MoA N162 pep1 2-8-0-0

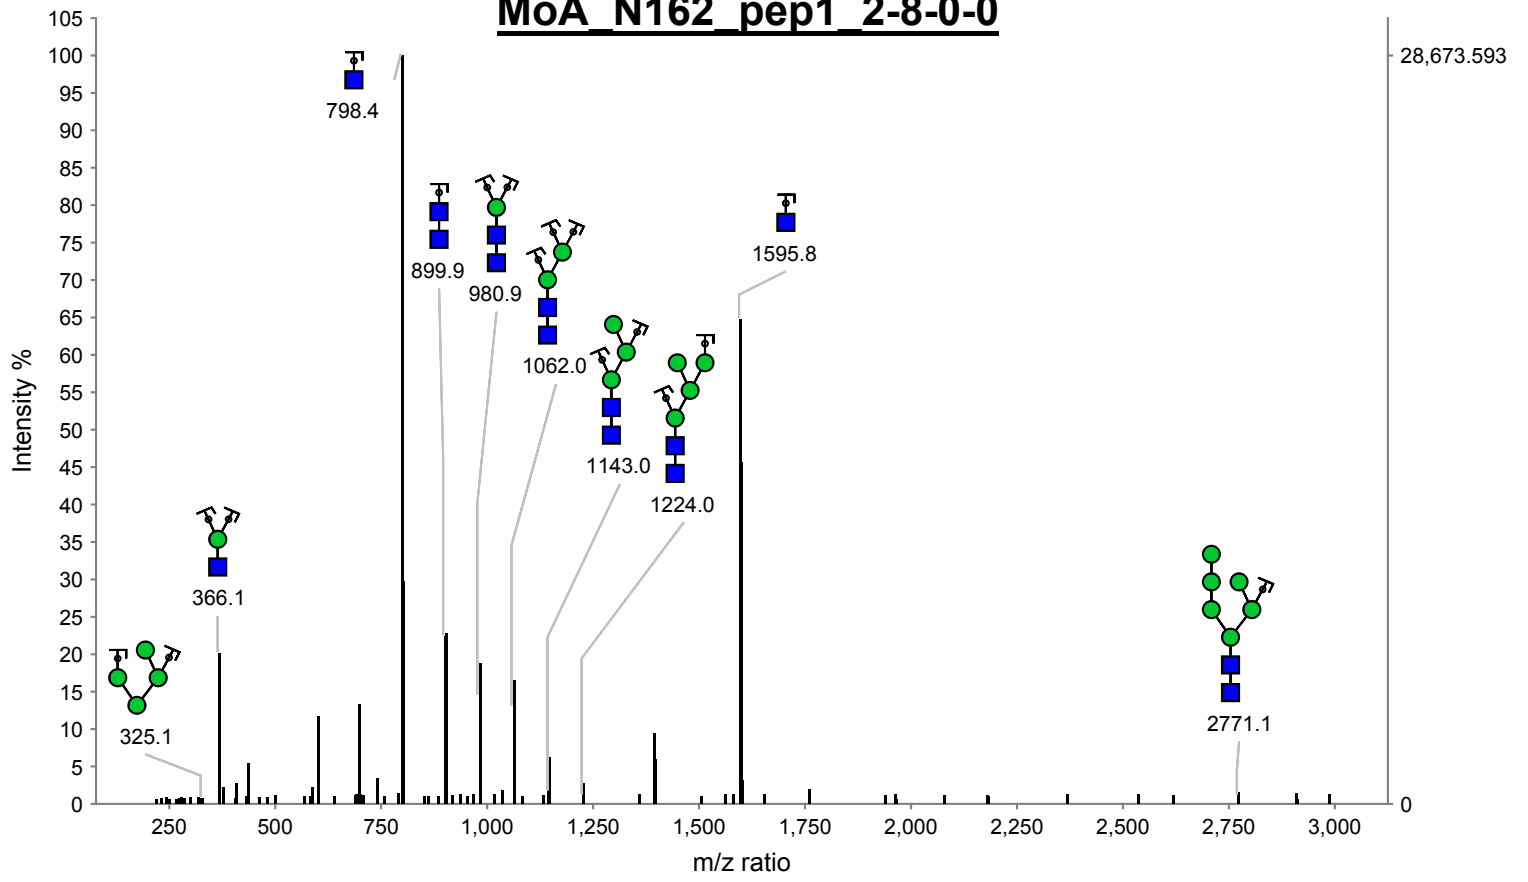

# MoA N162 pep1 2-9-0-0

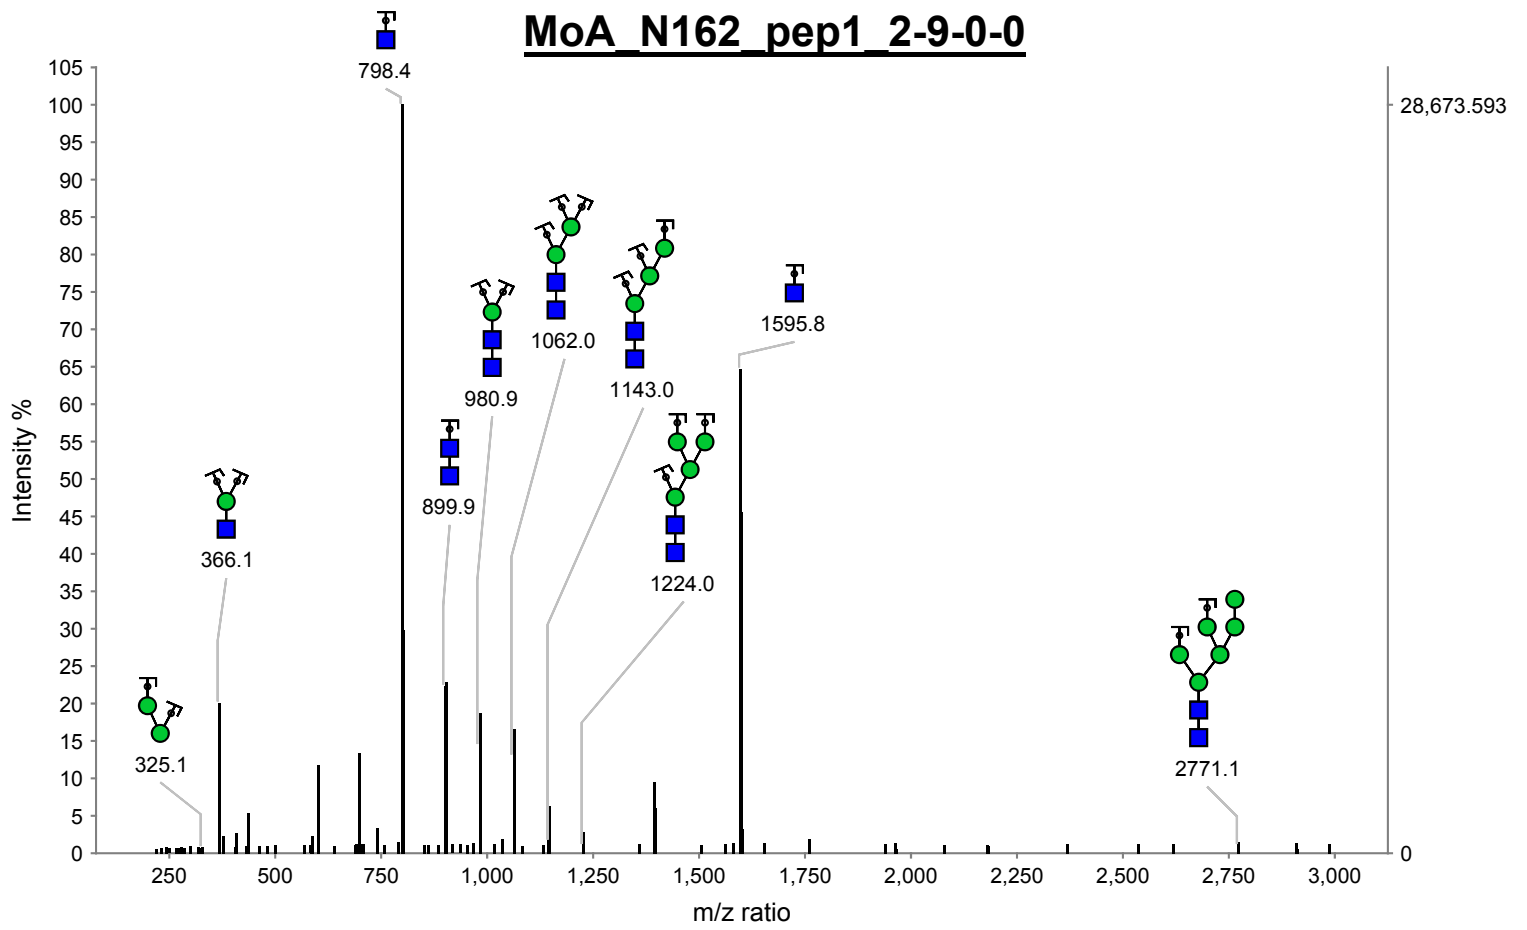

# MoA N162 pep1 3-4-1-0

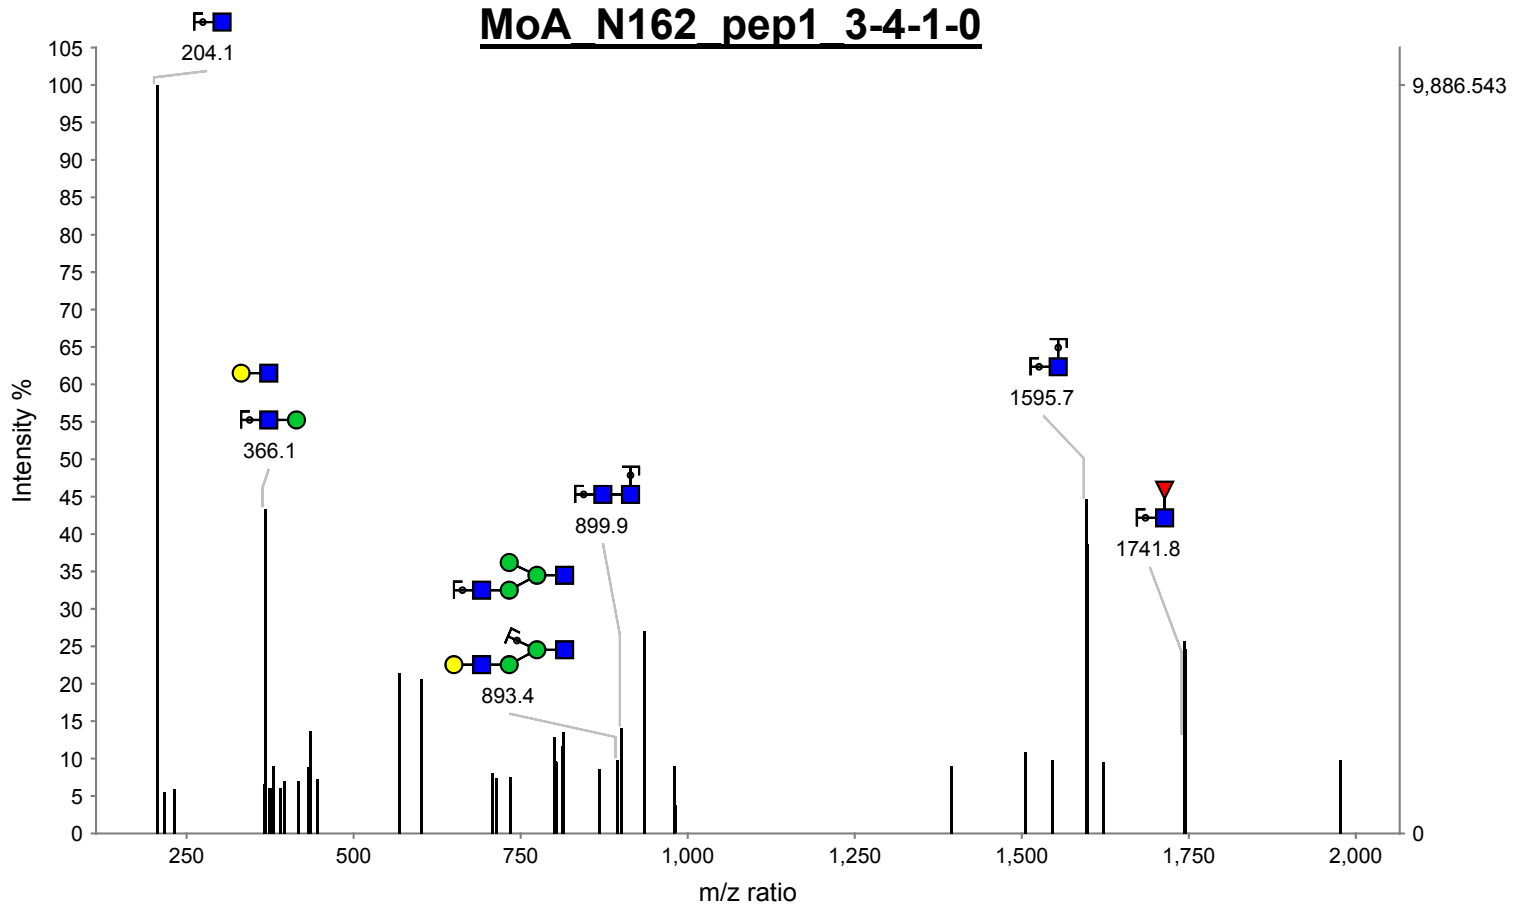

# MoA N162 pep1 3-4-1-1

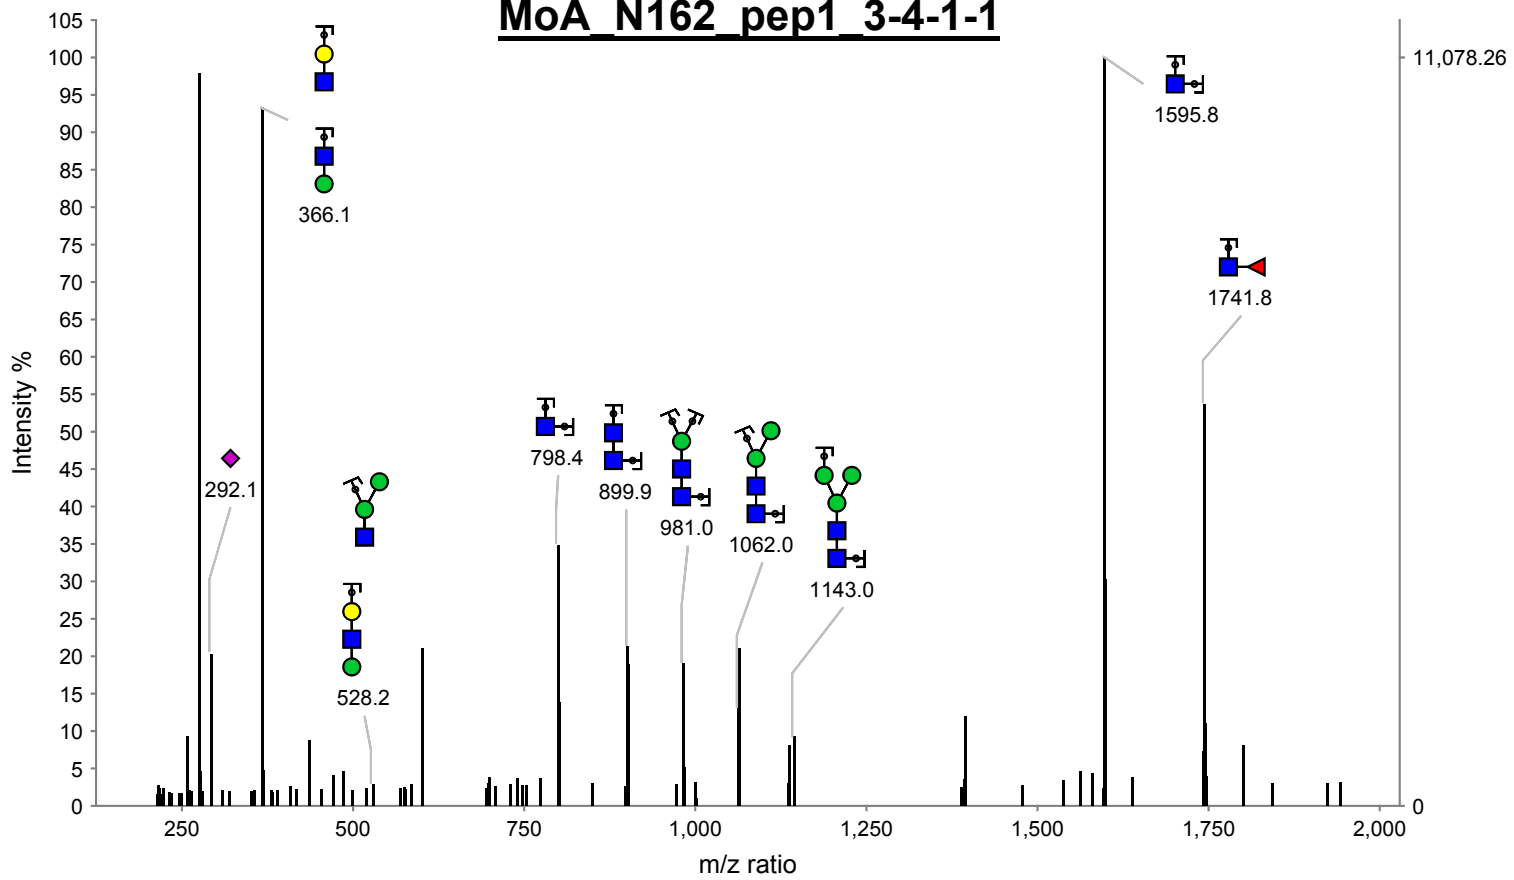

# MoA N162 pep1 4-5-1-0

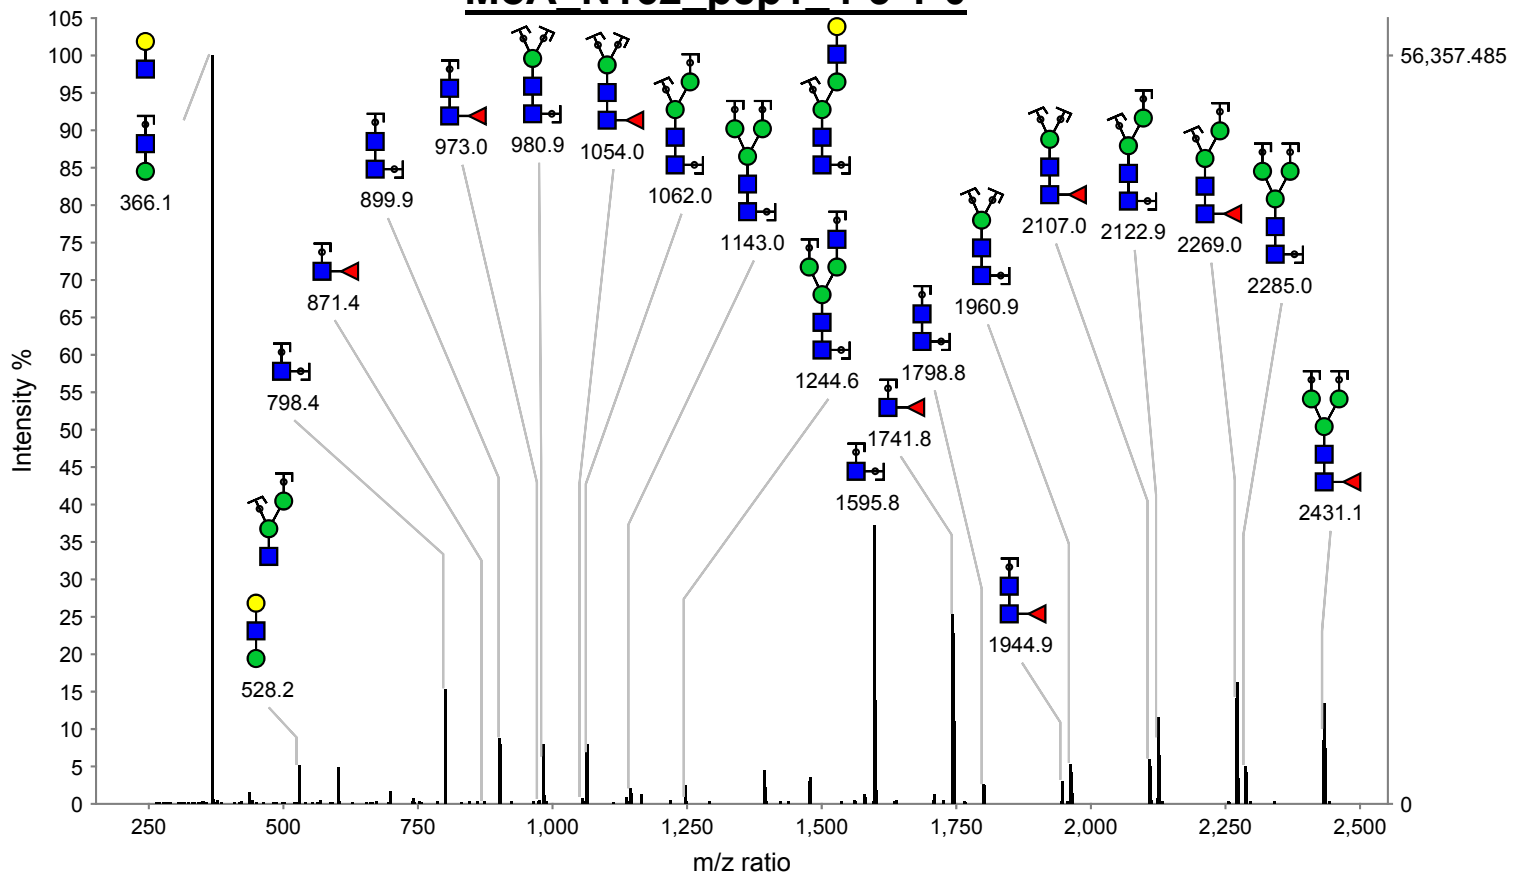

# MoA N162 pep1 4-5-1-1

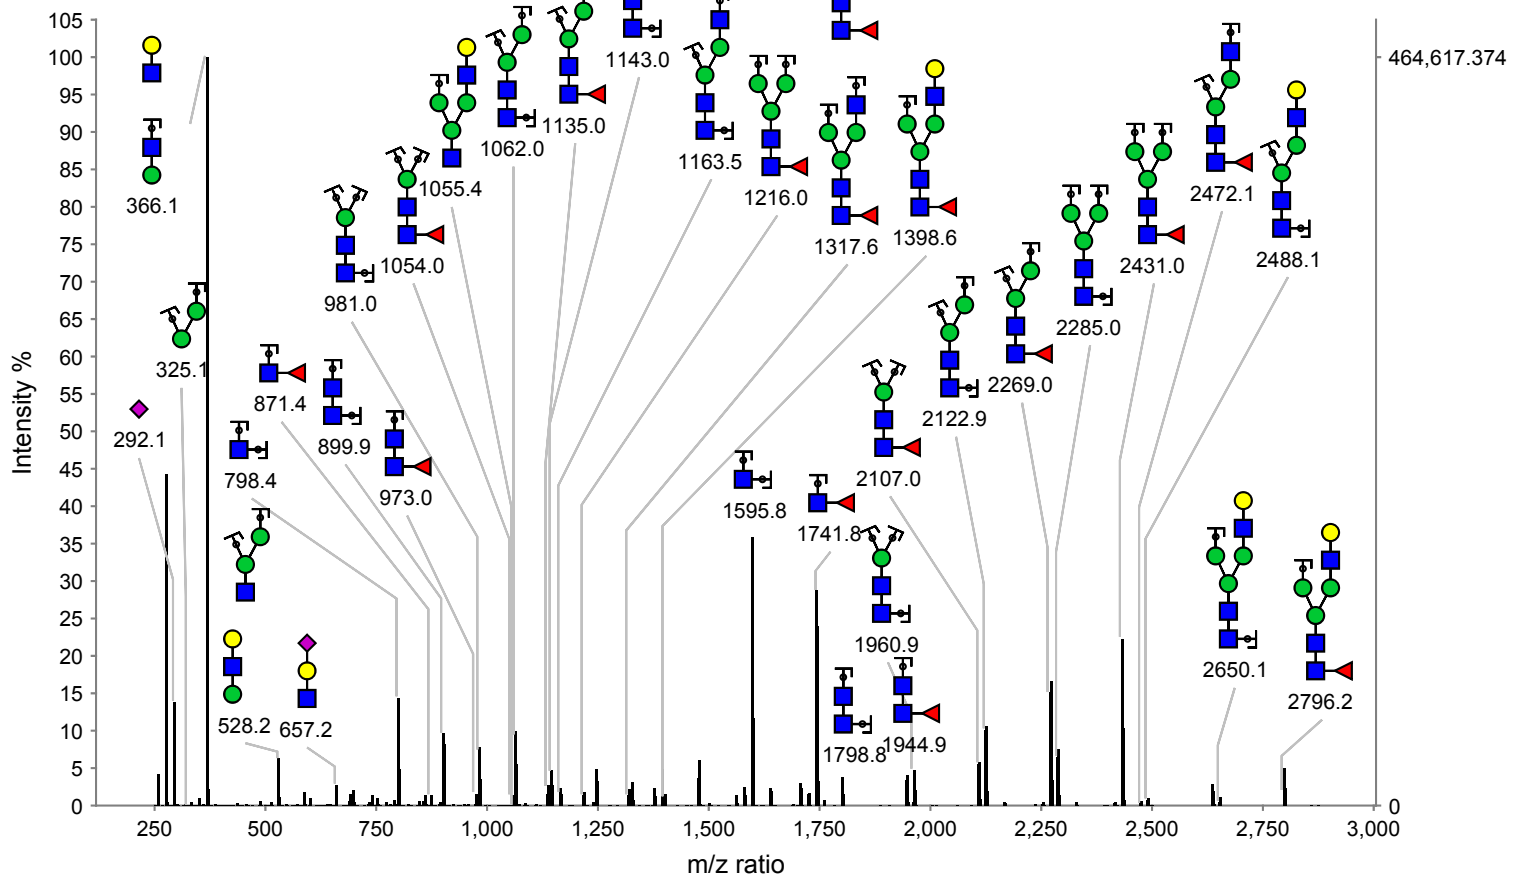

# MoA\_N162\_pep1\_4-5-1-2

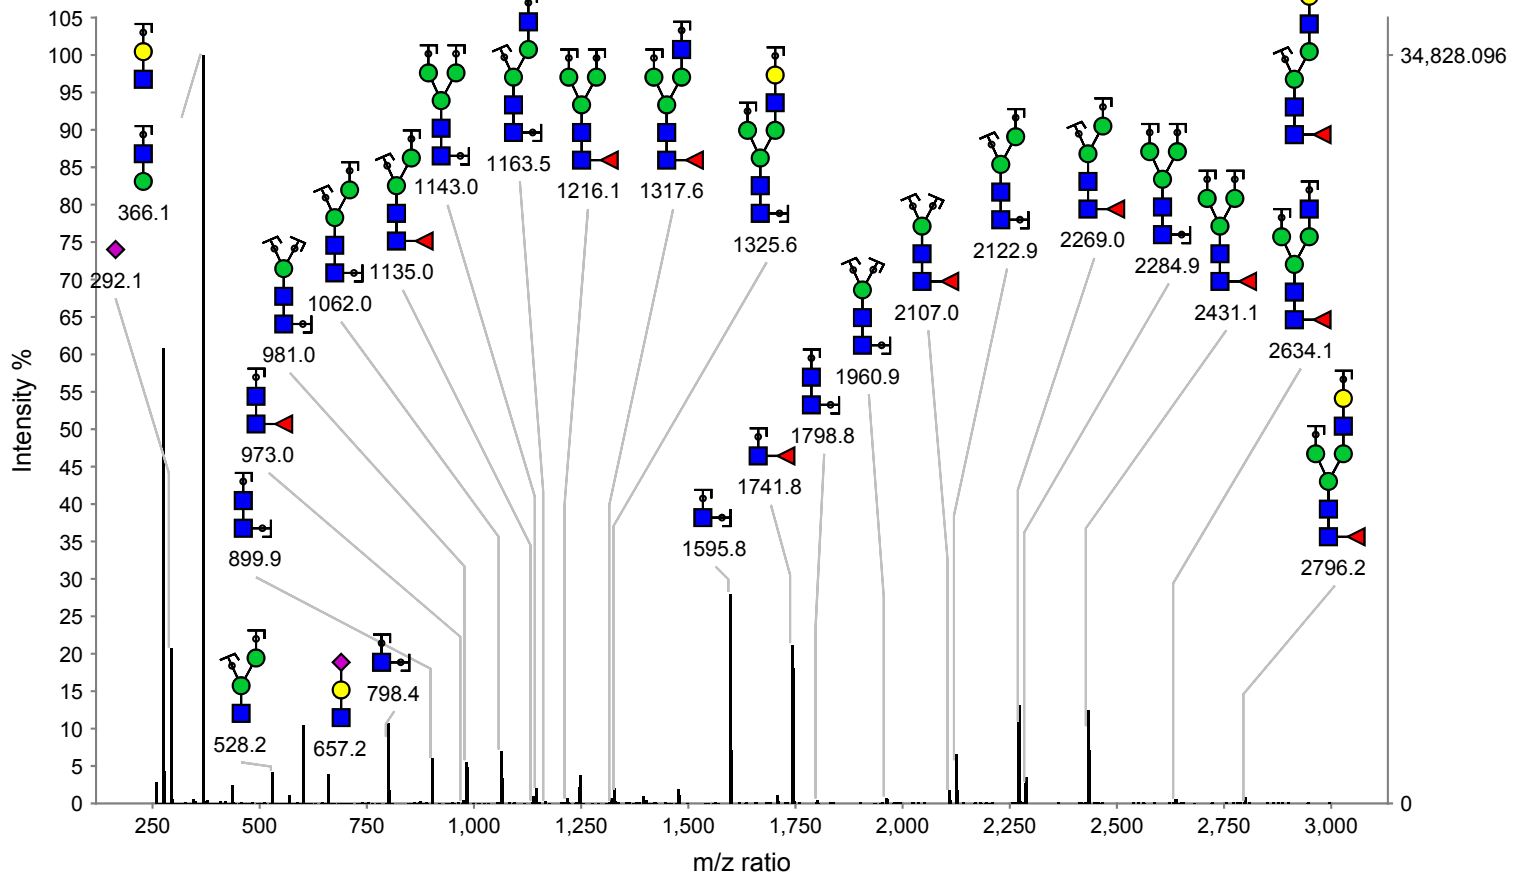



# MoA N162 pep1 4-5-2-0

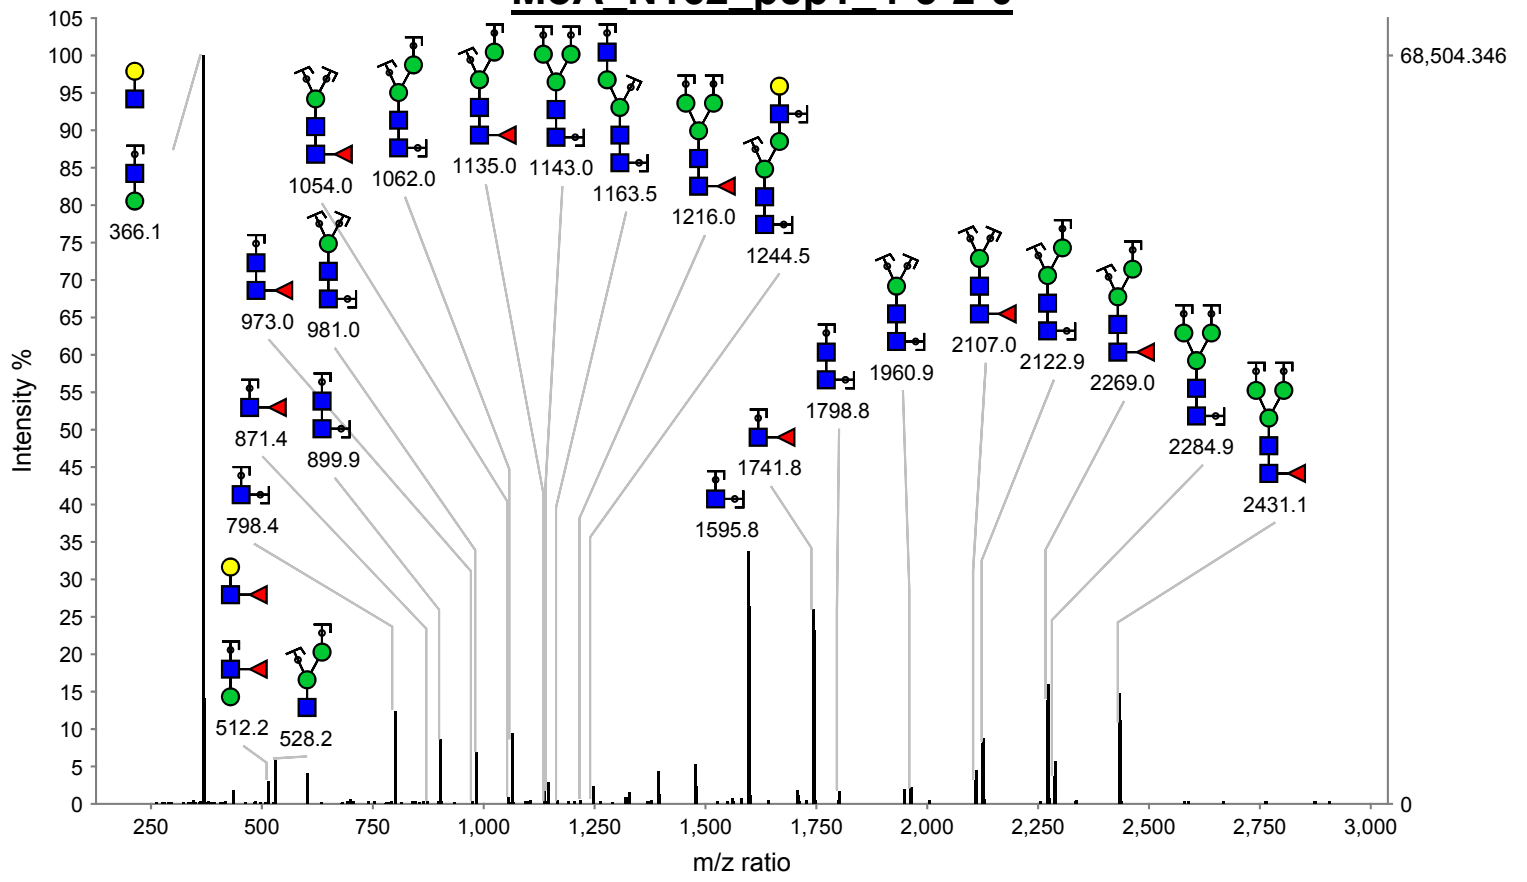

# MoA N162 pep1 4-5-2-1

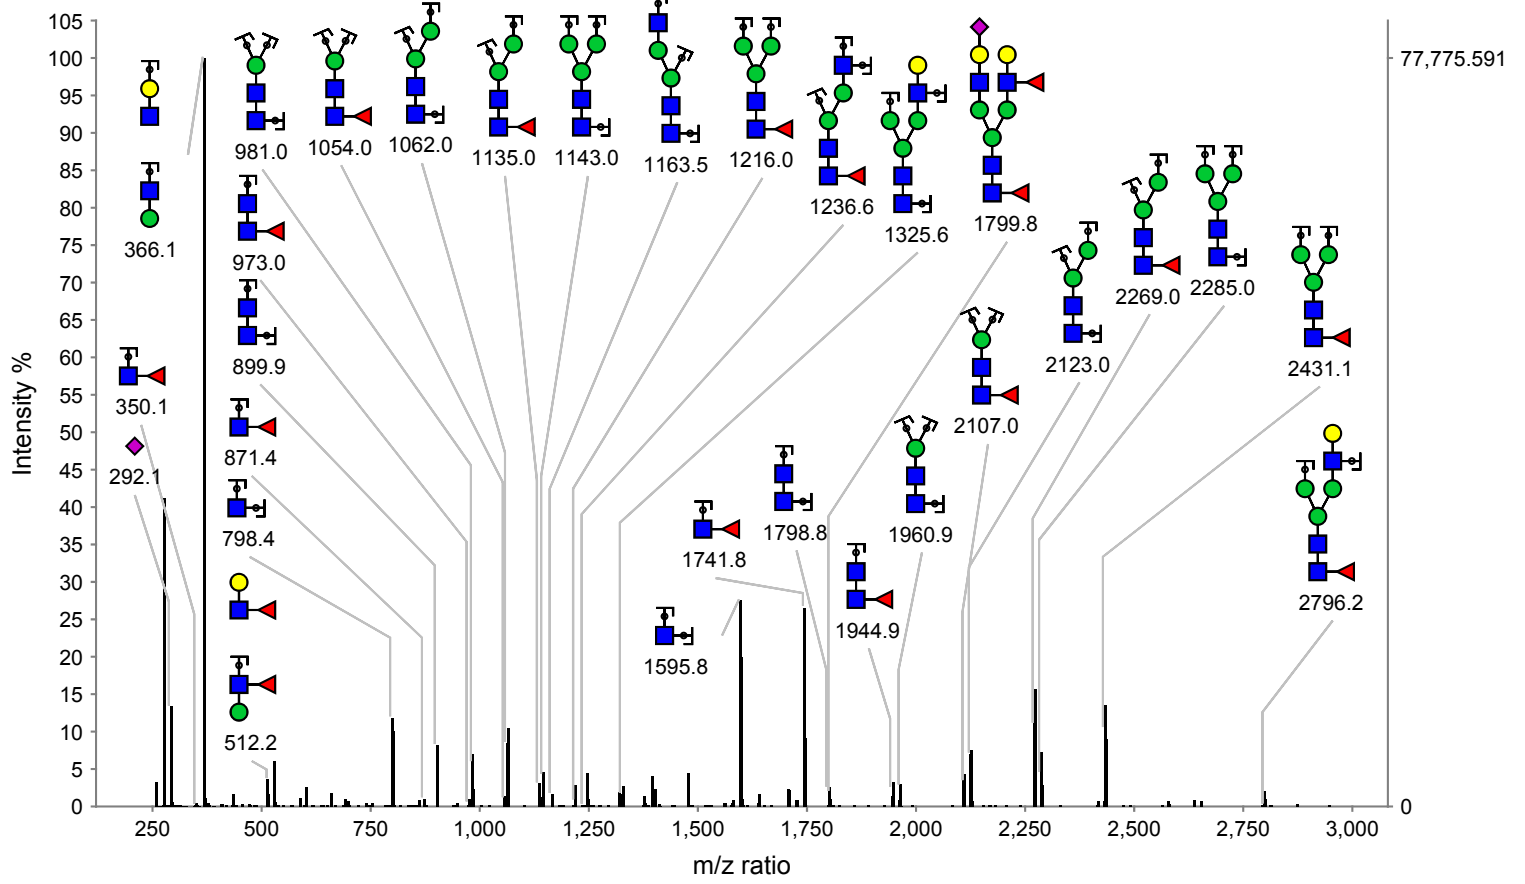

# MoA N162 pep1 5-6-1-1

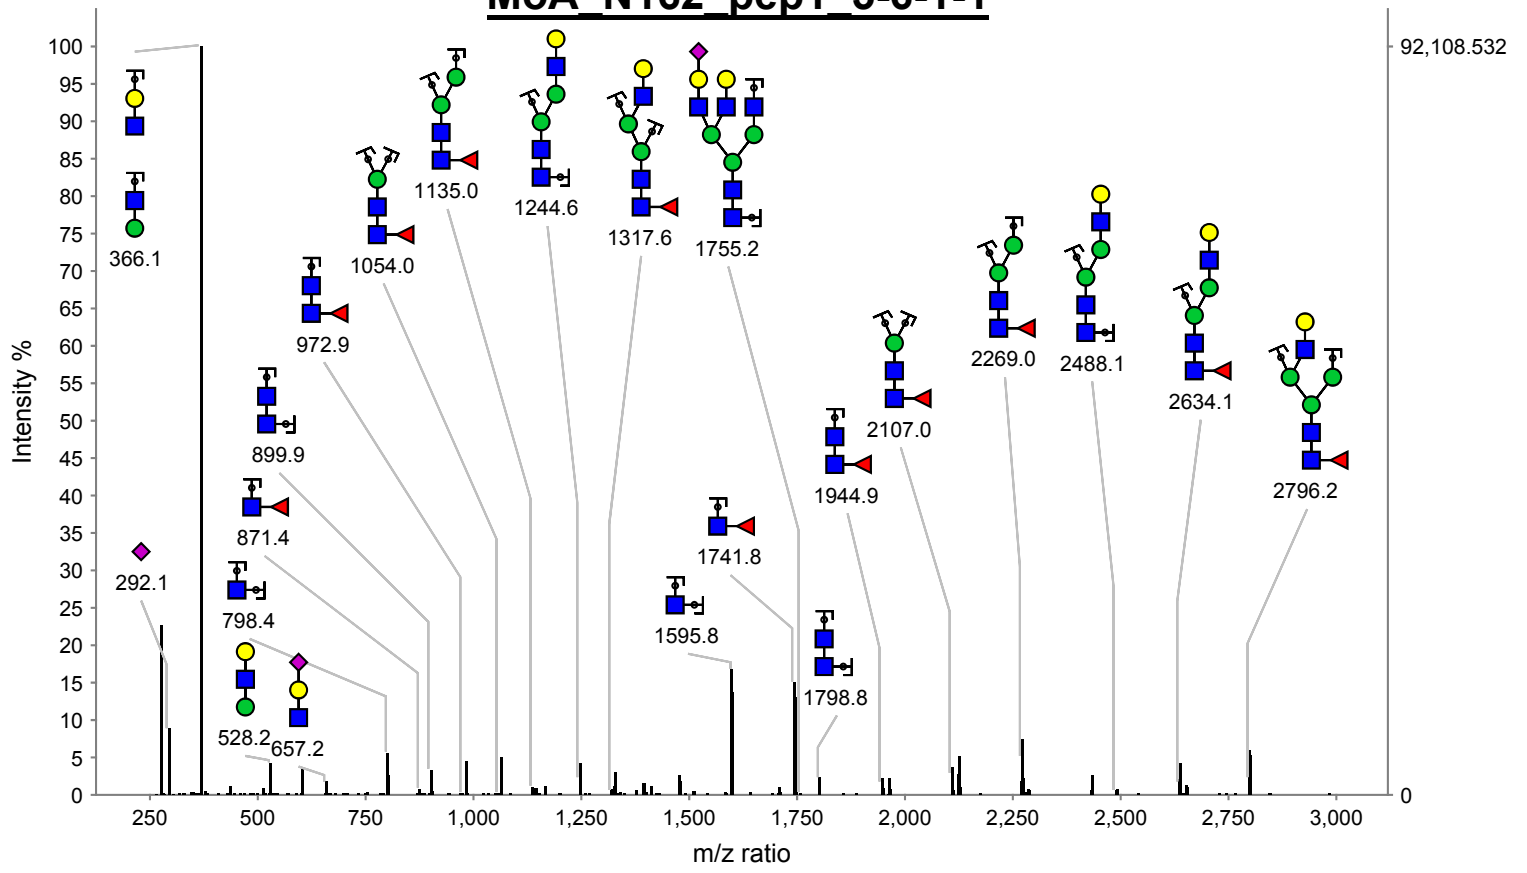

# MoA N162 pep1 5-6-1-2

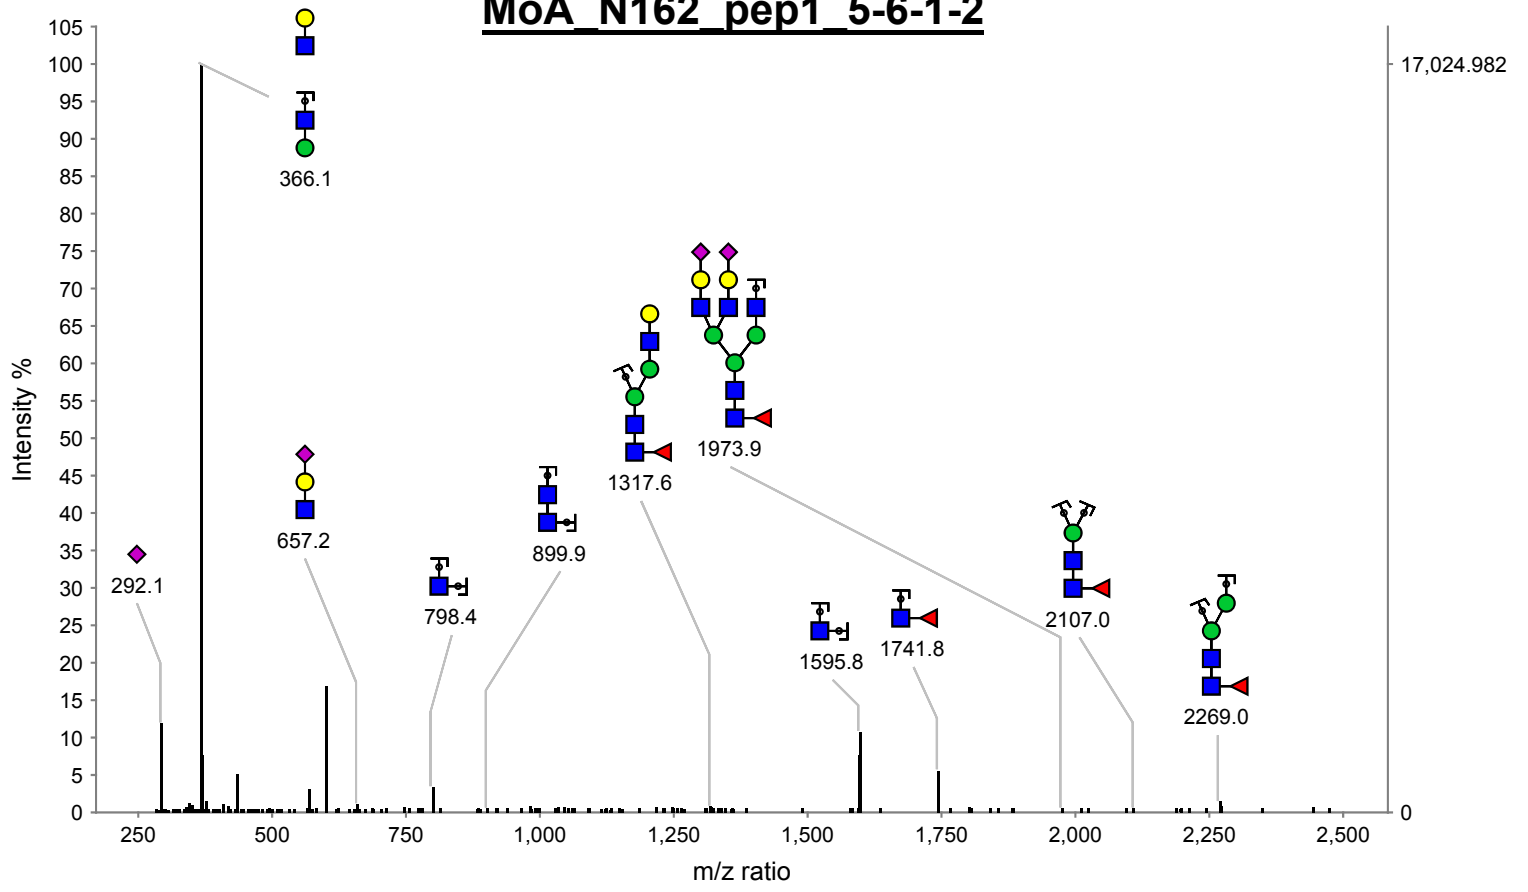

# MoA N162 pep1 5-6-2-1

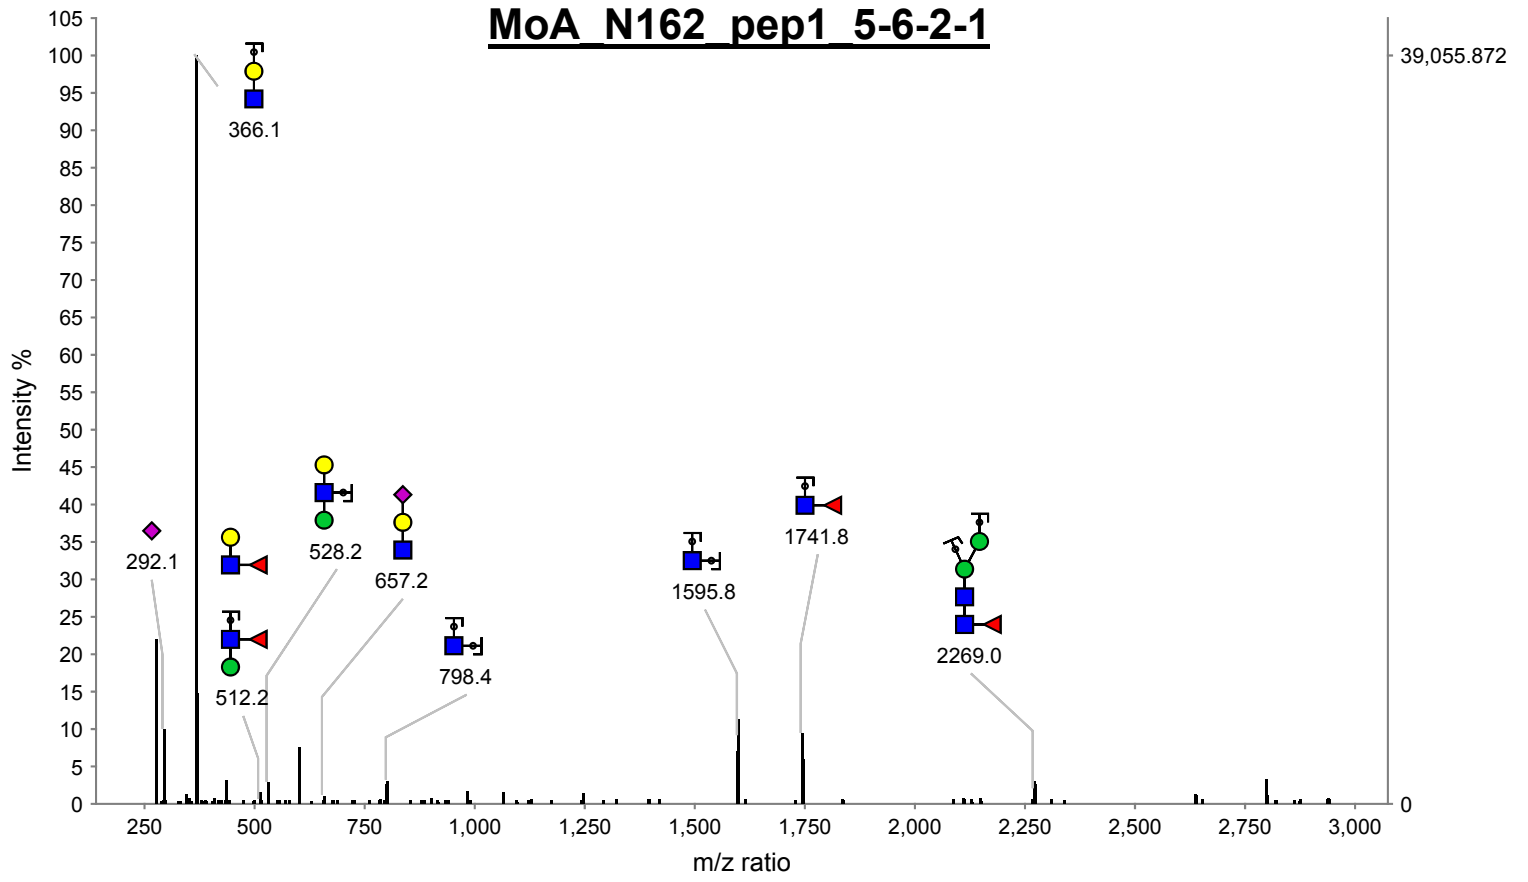

# MoA N169 pep1 4-5-1-1

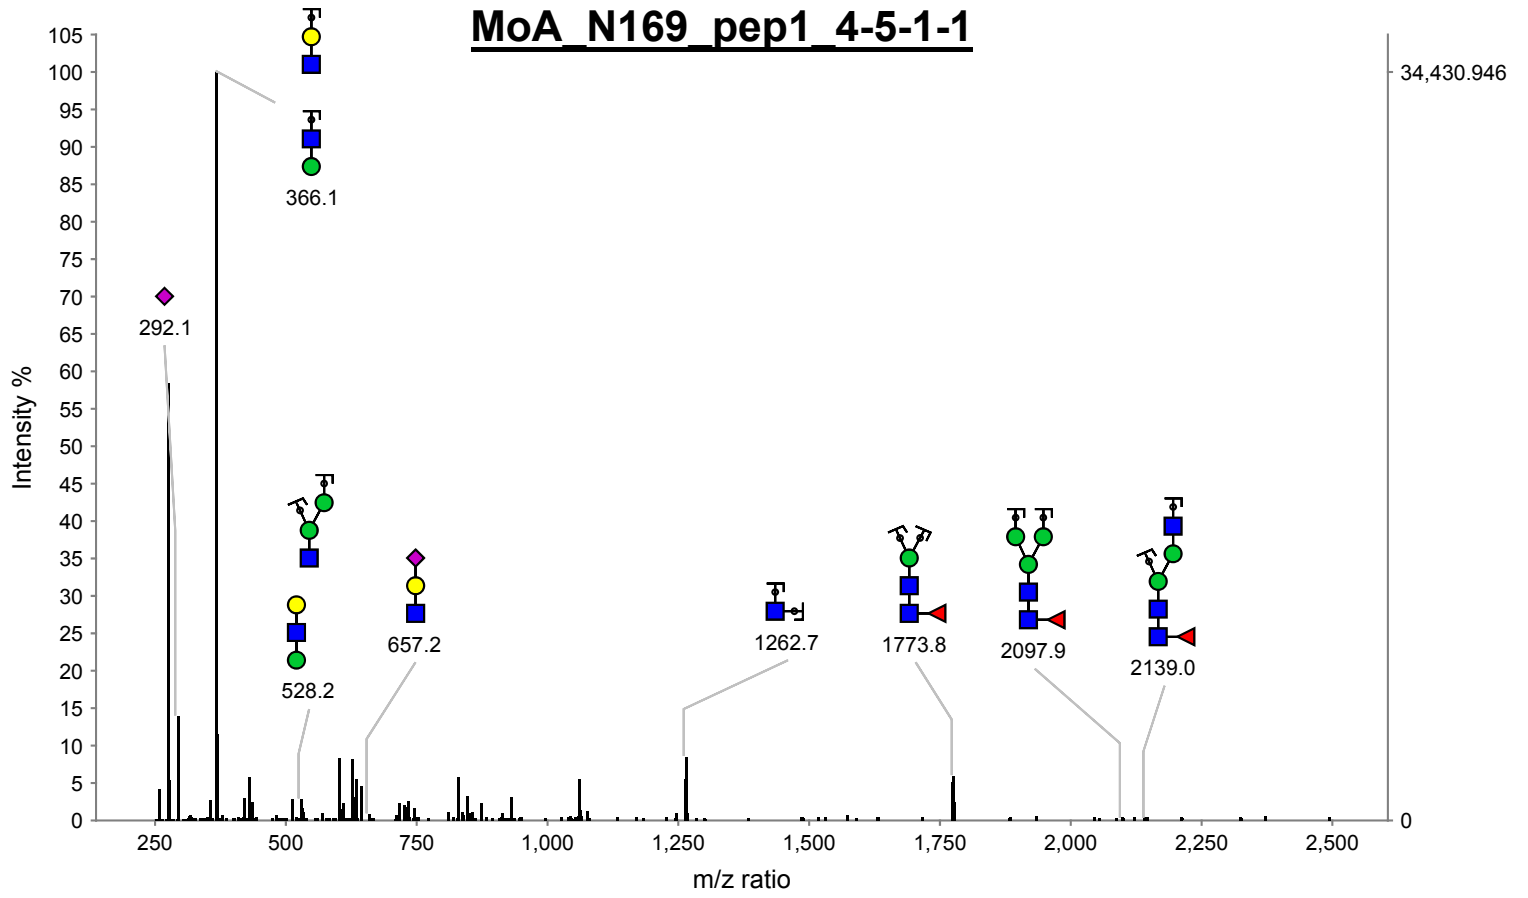

# MoA N169 pep1 4-5-1-2

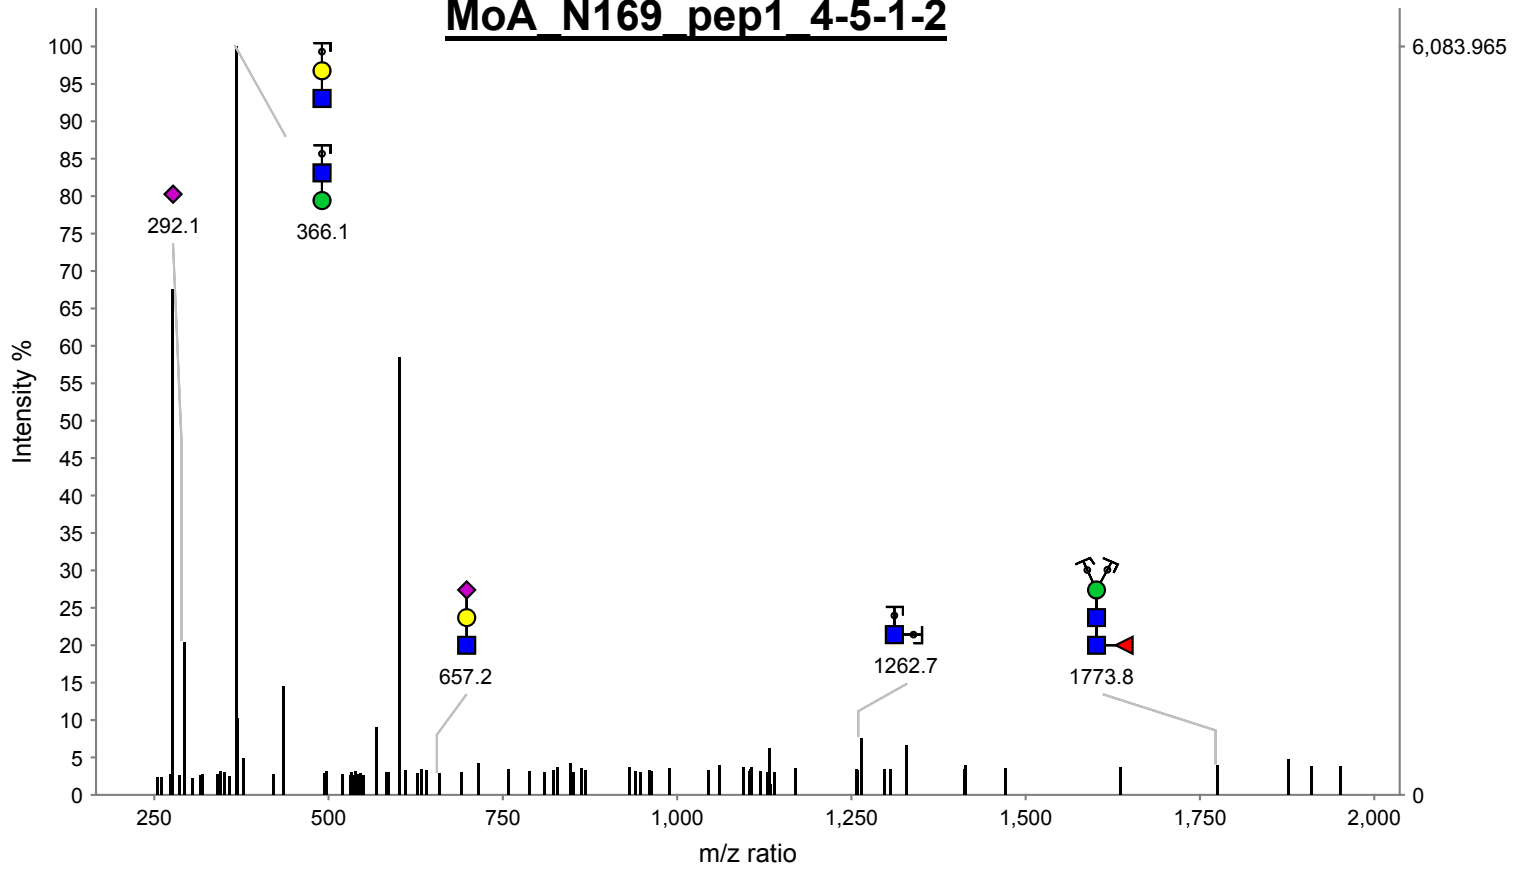

# MoA N169 pep2 4-5-1-1

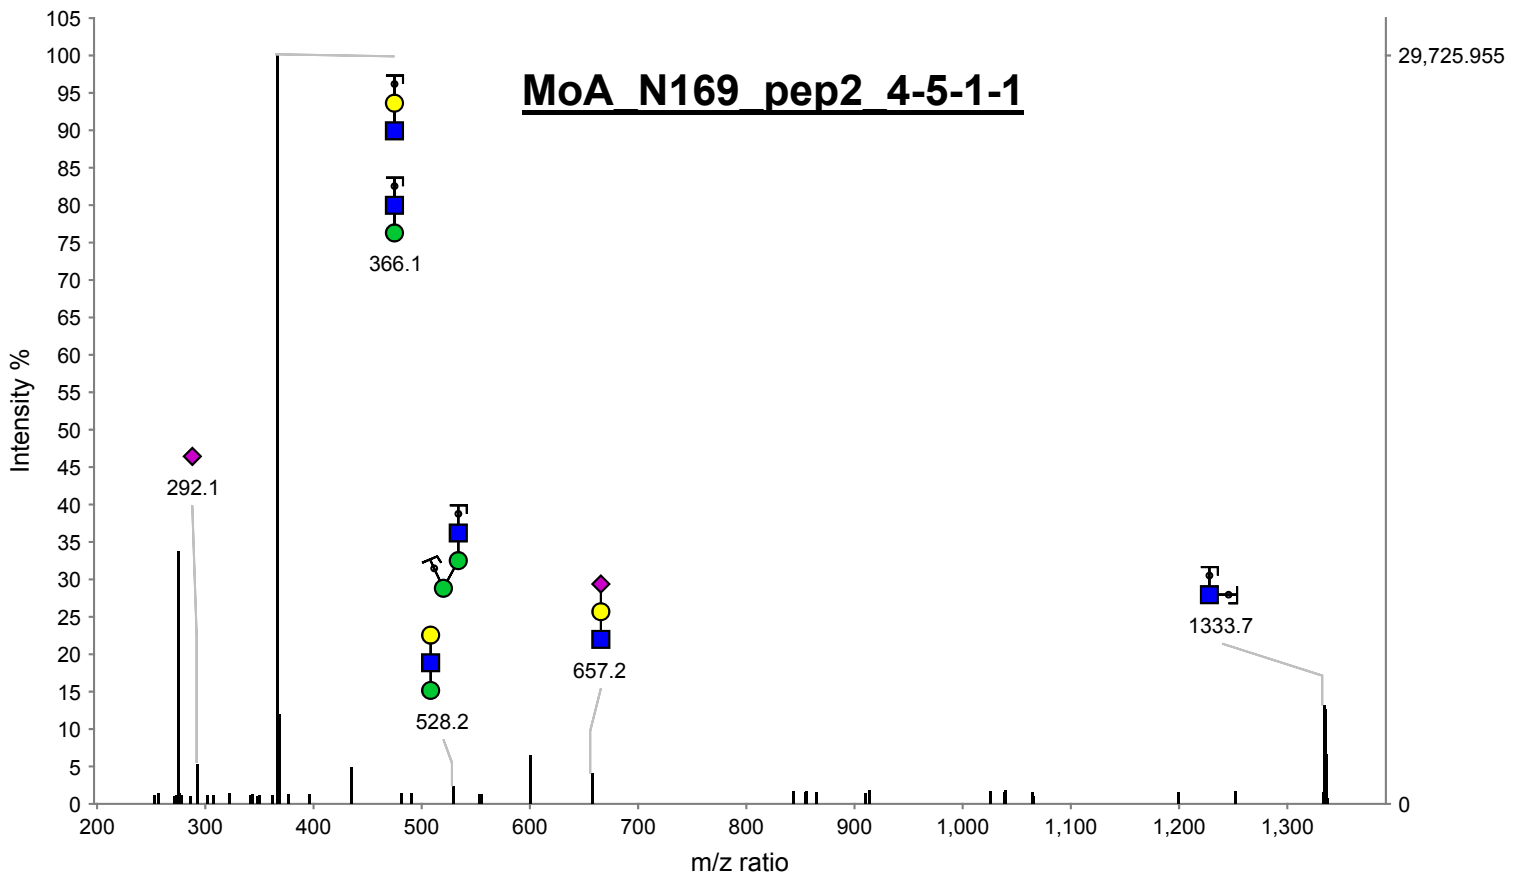



# MoB N162 pep2 4-5-1-1

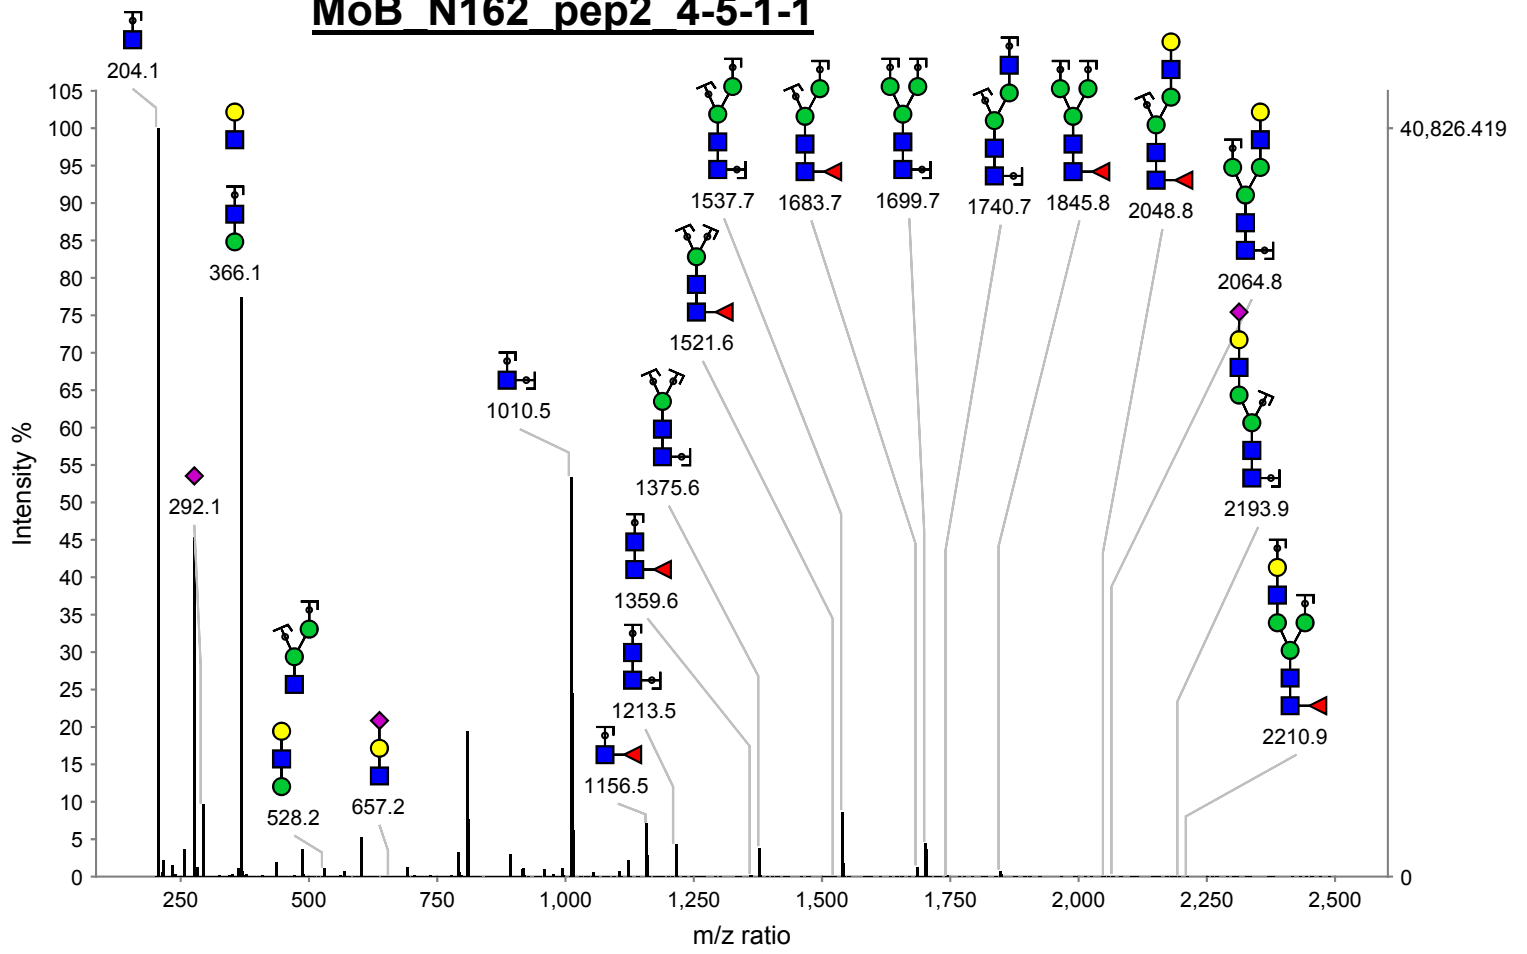

# MoB N162 pep2 4-5-1-2

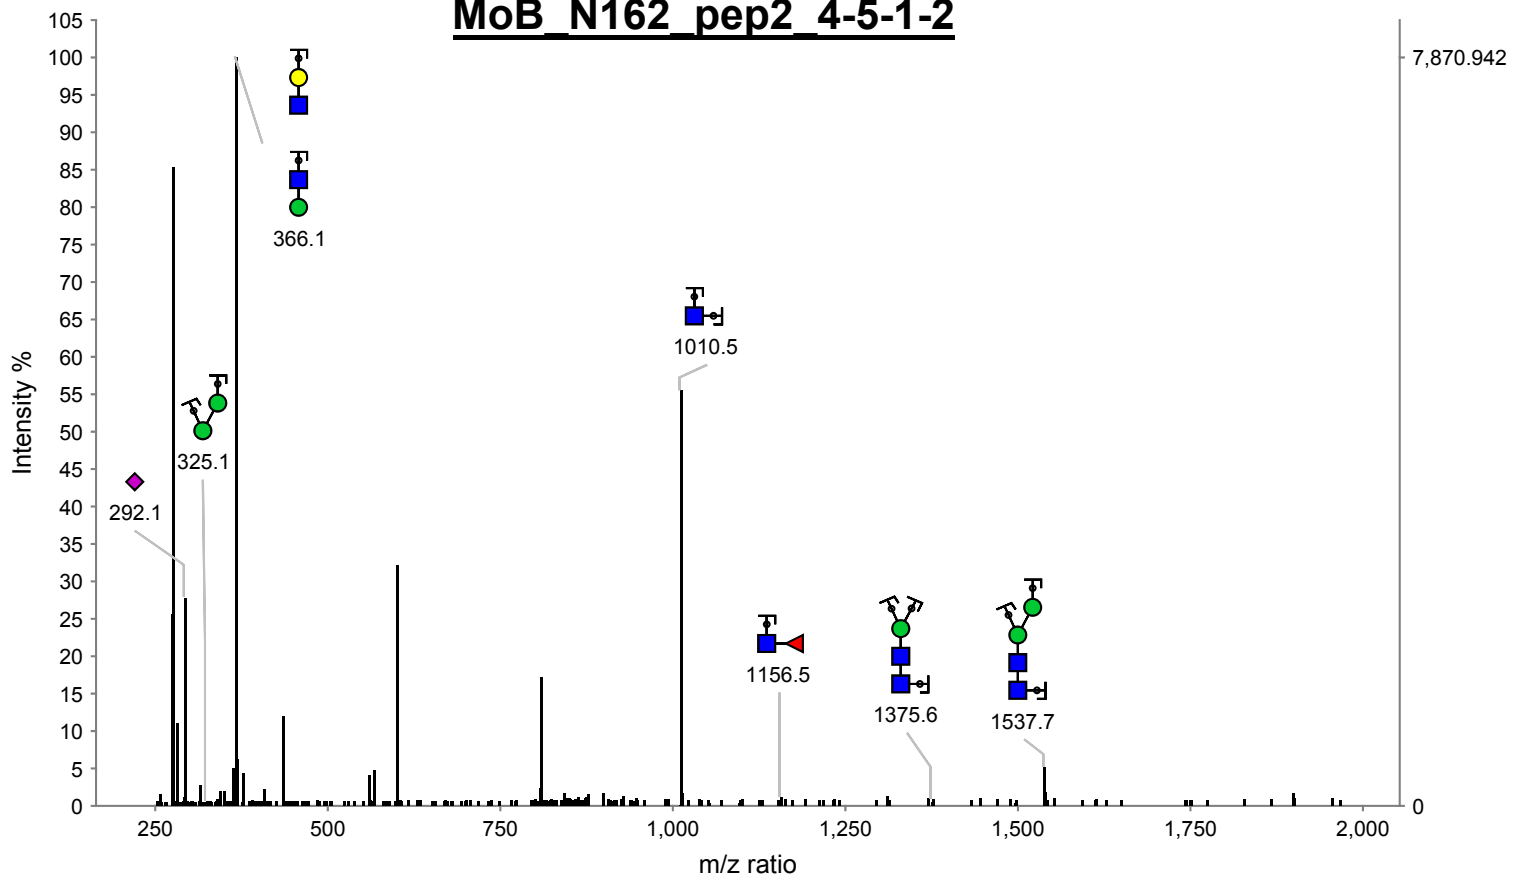

# MoB\_N162\_pep2\_5-6-1-1

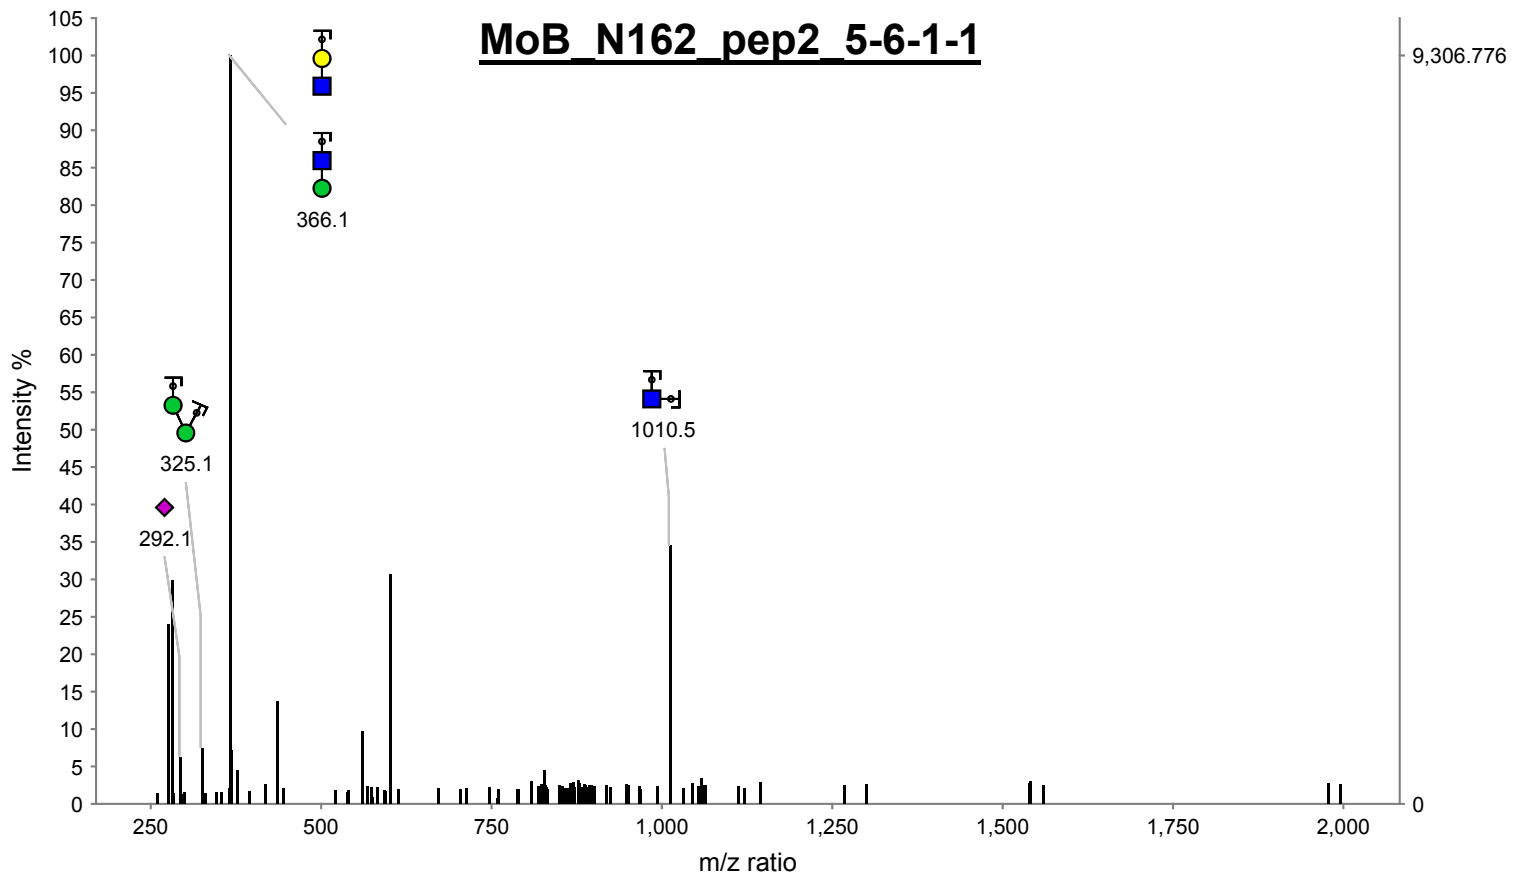

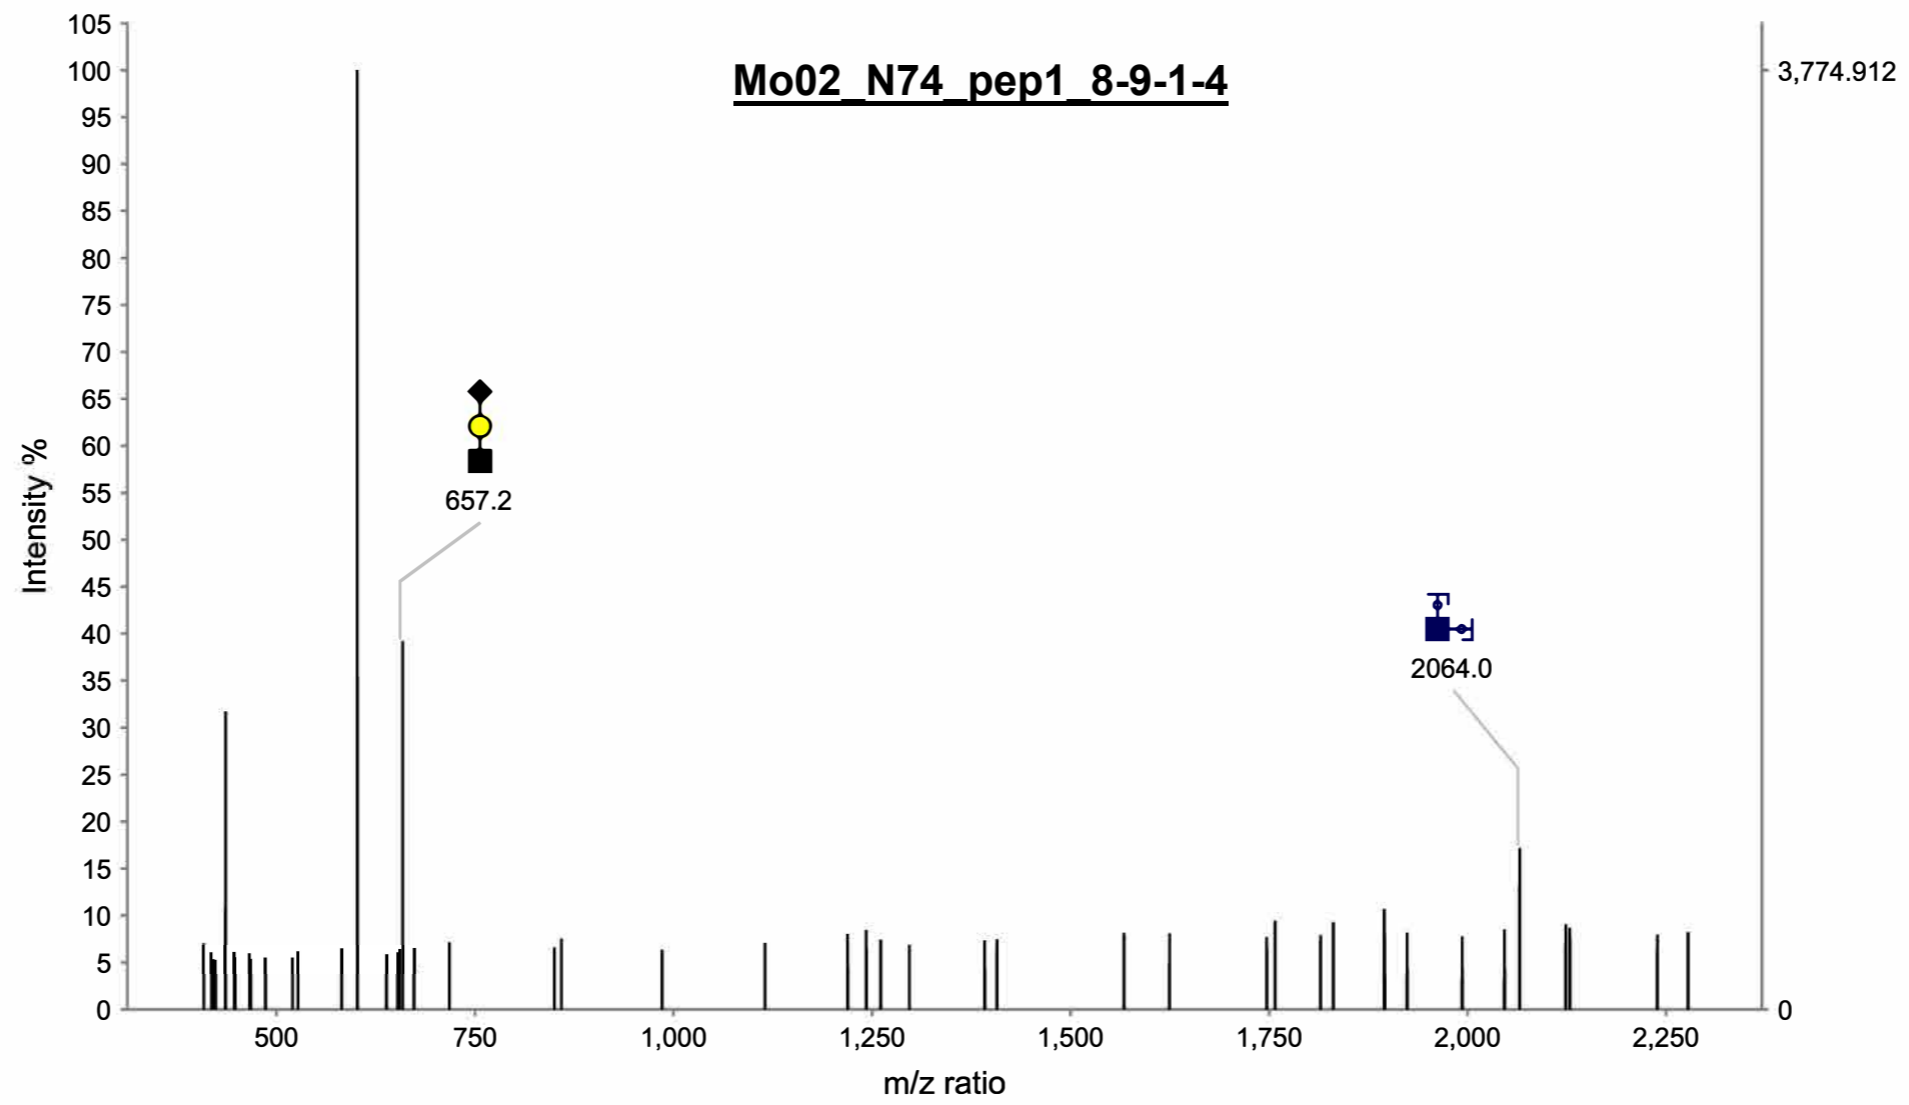

# MoB\_CD32a\_N64\_pep1\_4-5-1-1

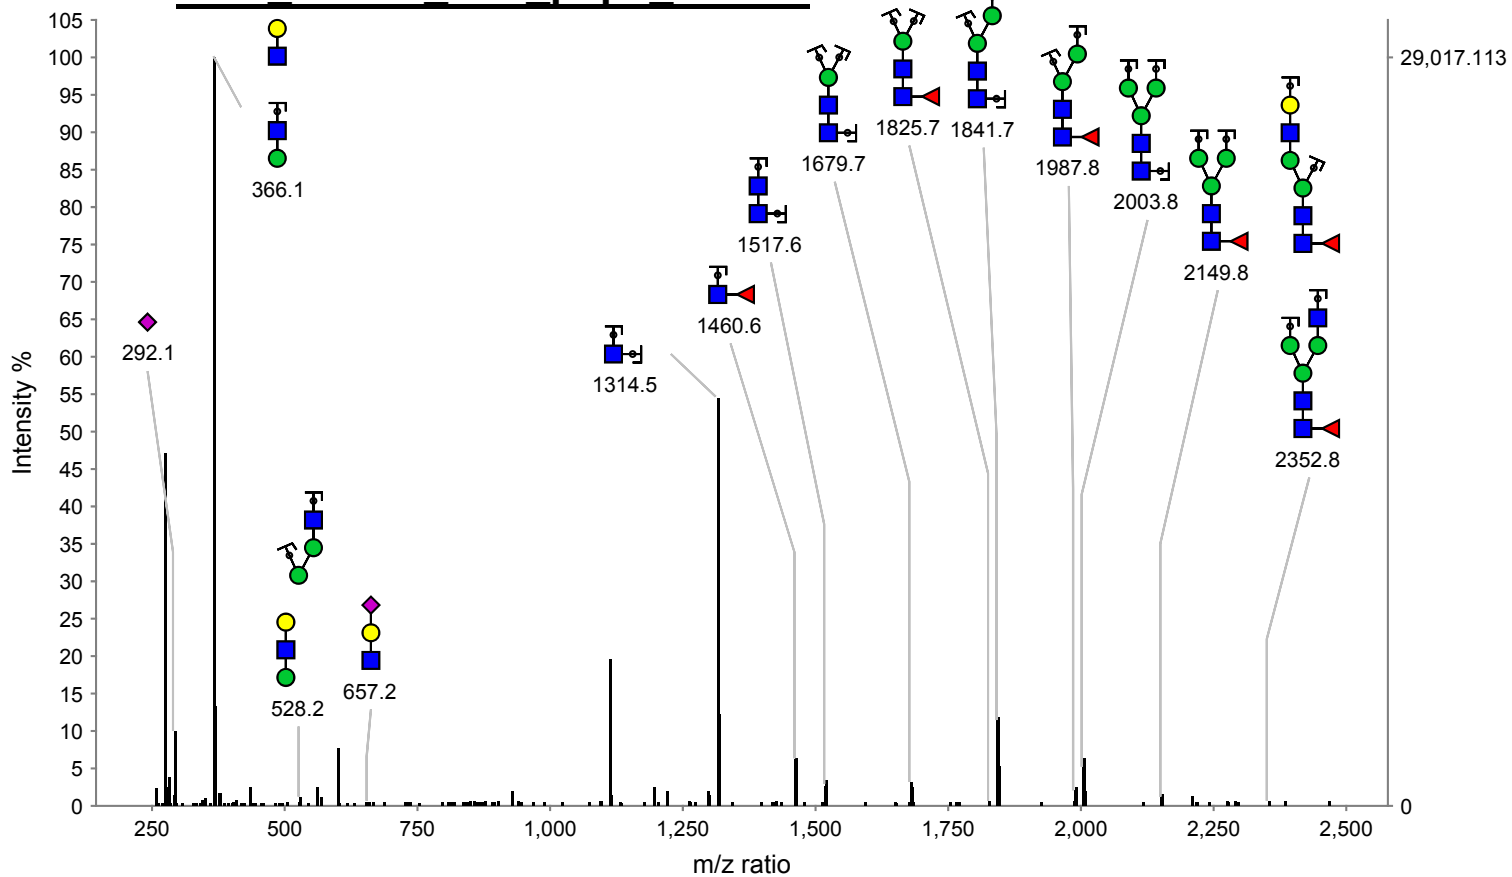

# MoB CD32a N64 pep1 4-5-1-2

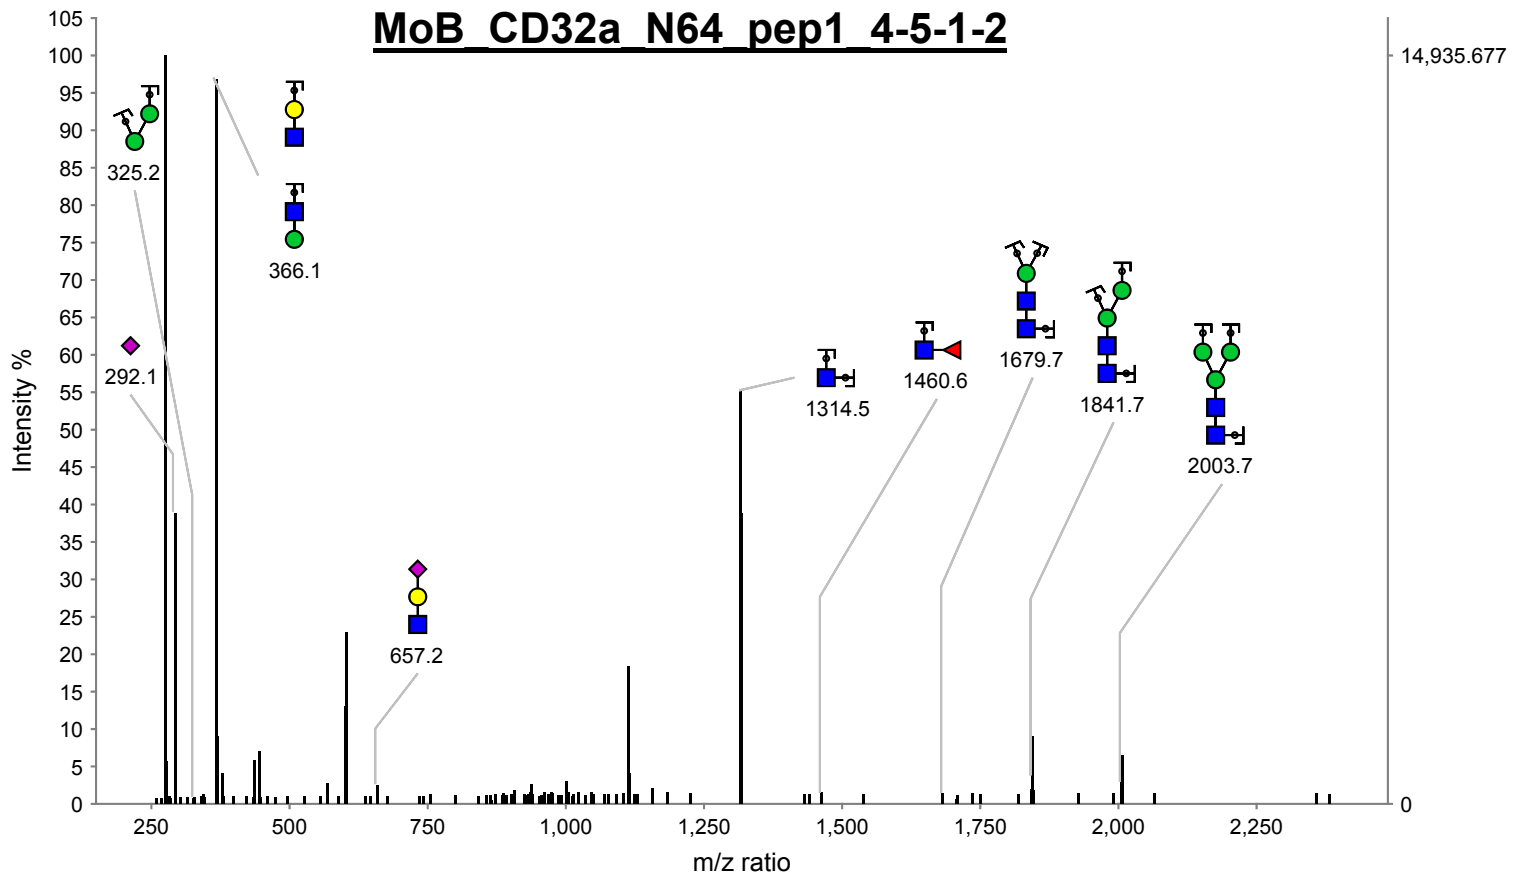

# MoB\_CD32a\_N64\_pep1\_4-5-2-1

7,045.697

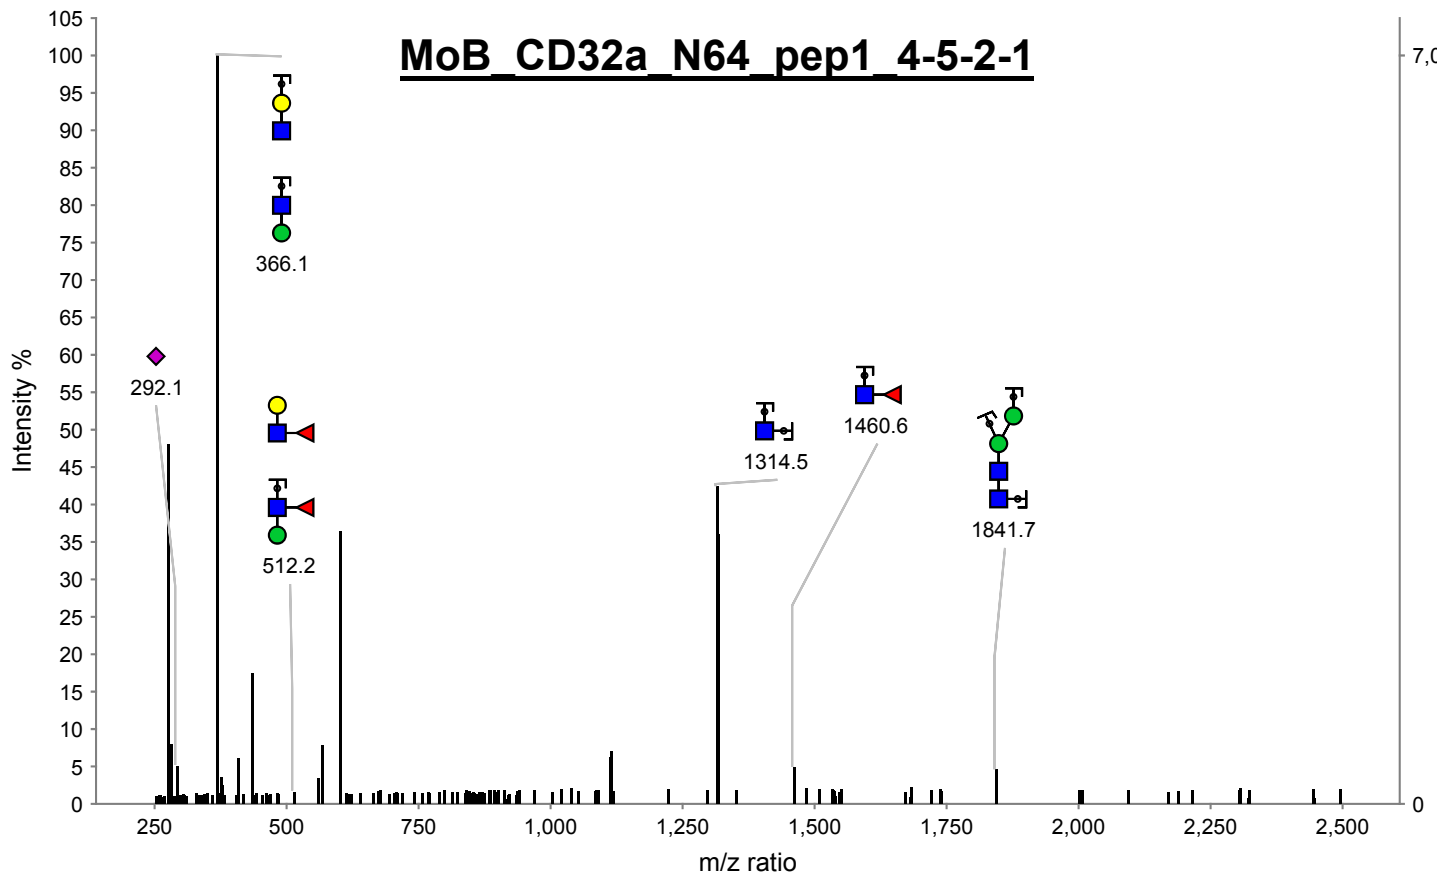

# MoB CD32a N64 pep1 5-6-1-2

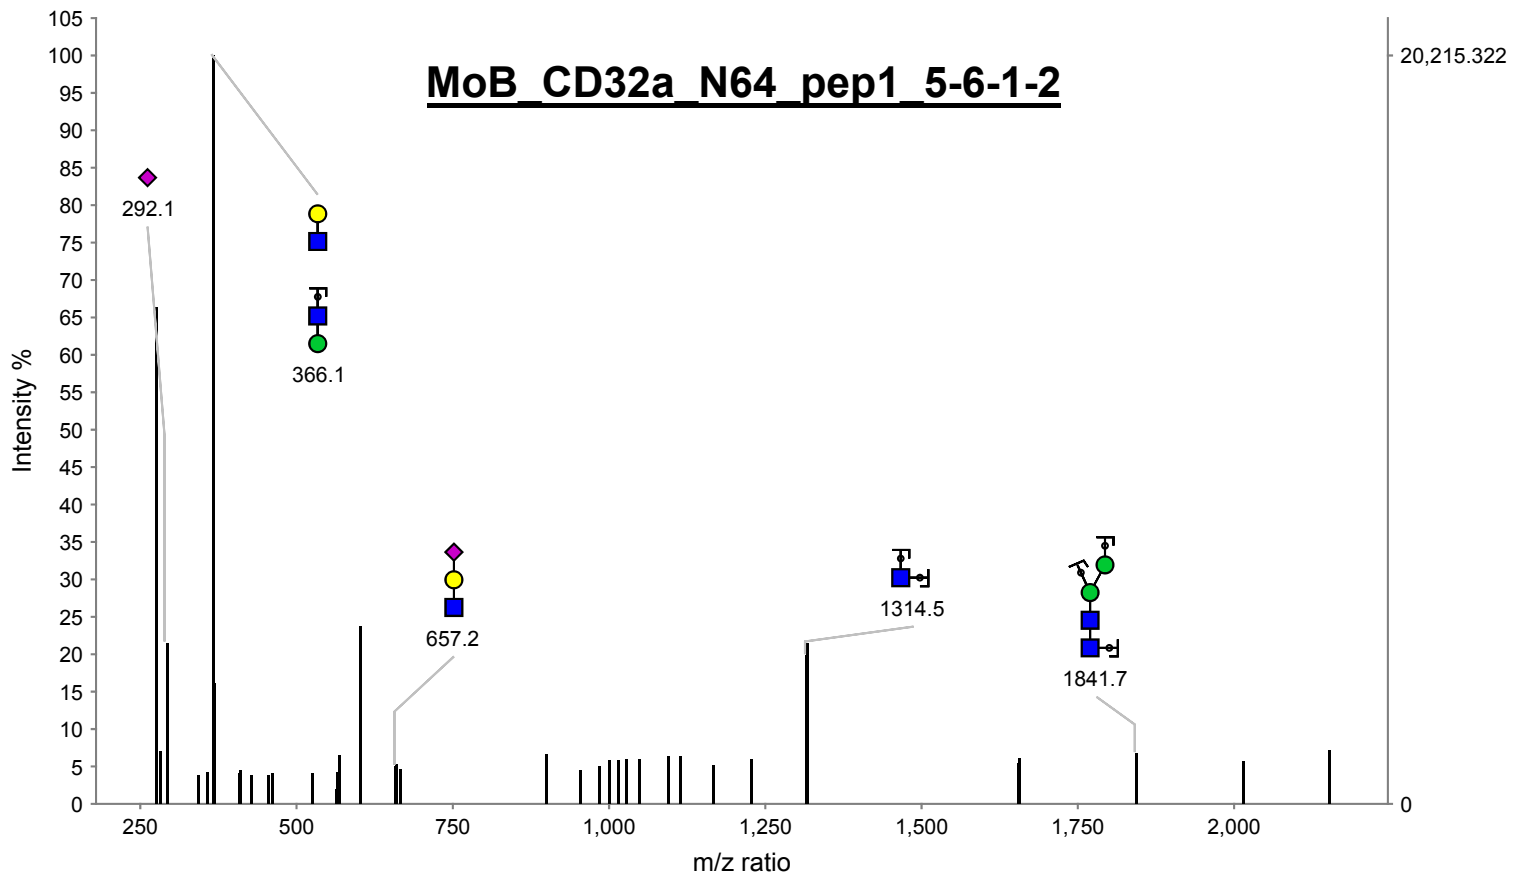



# MoB CD32a N64 pep2 4-5-1-1

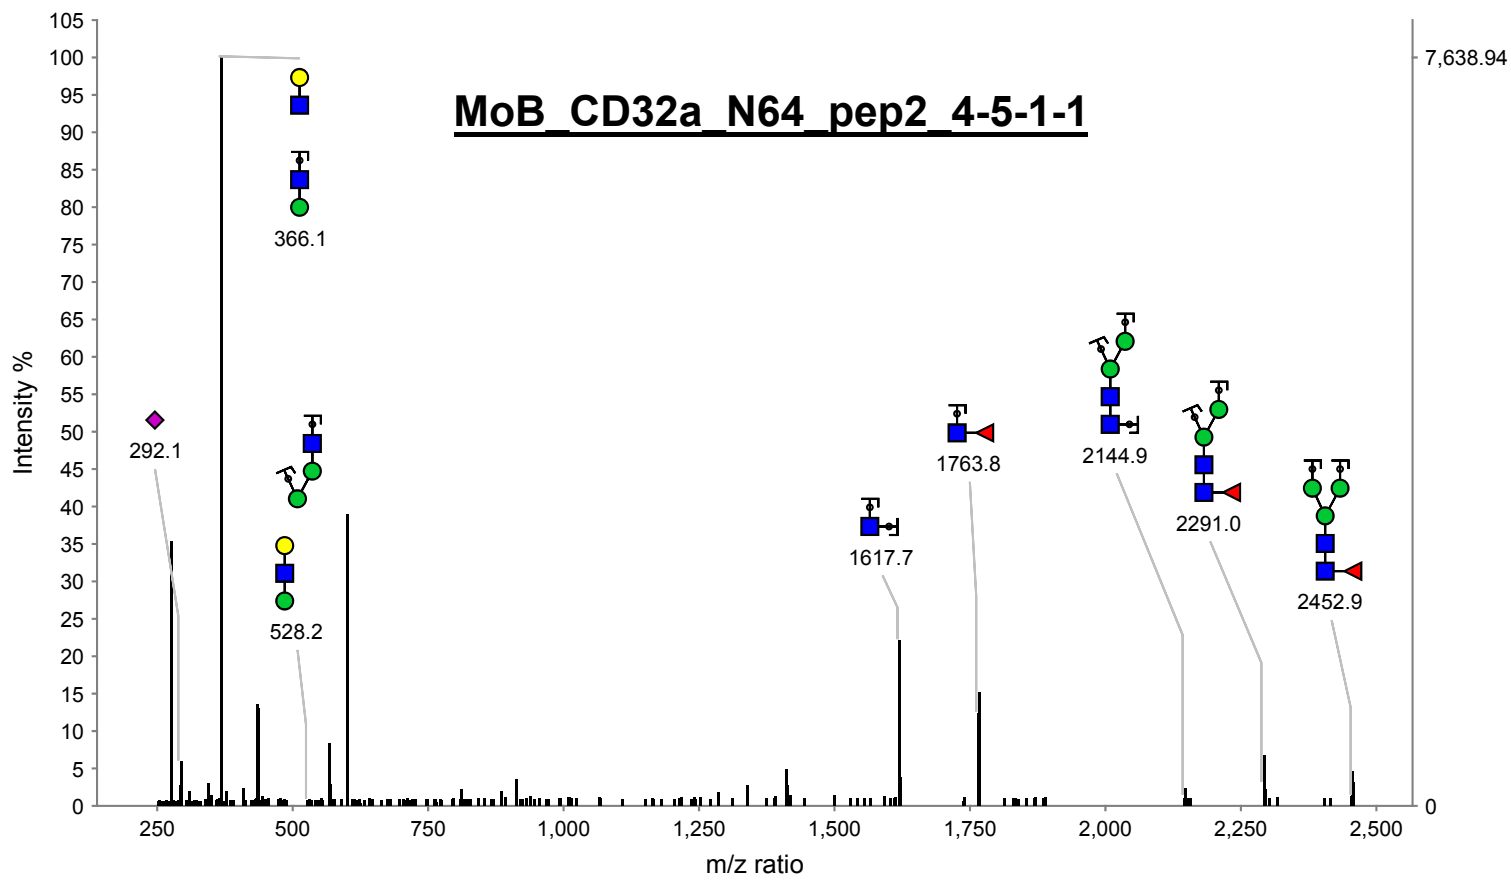

# MoB CD32a N64 pep2 4-5-1-2

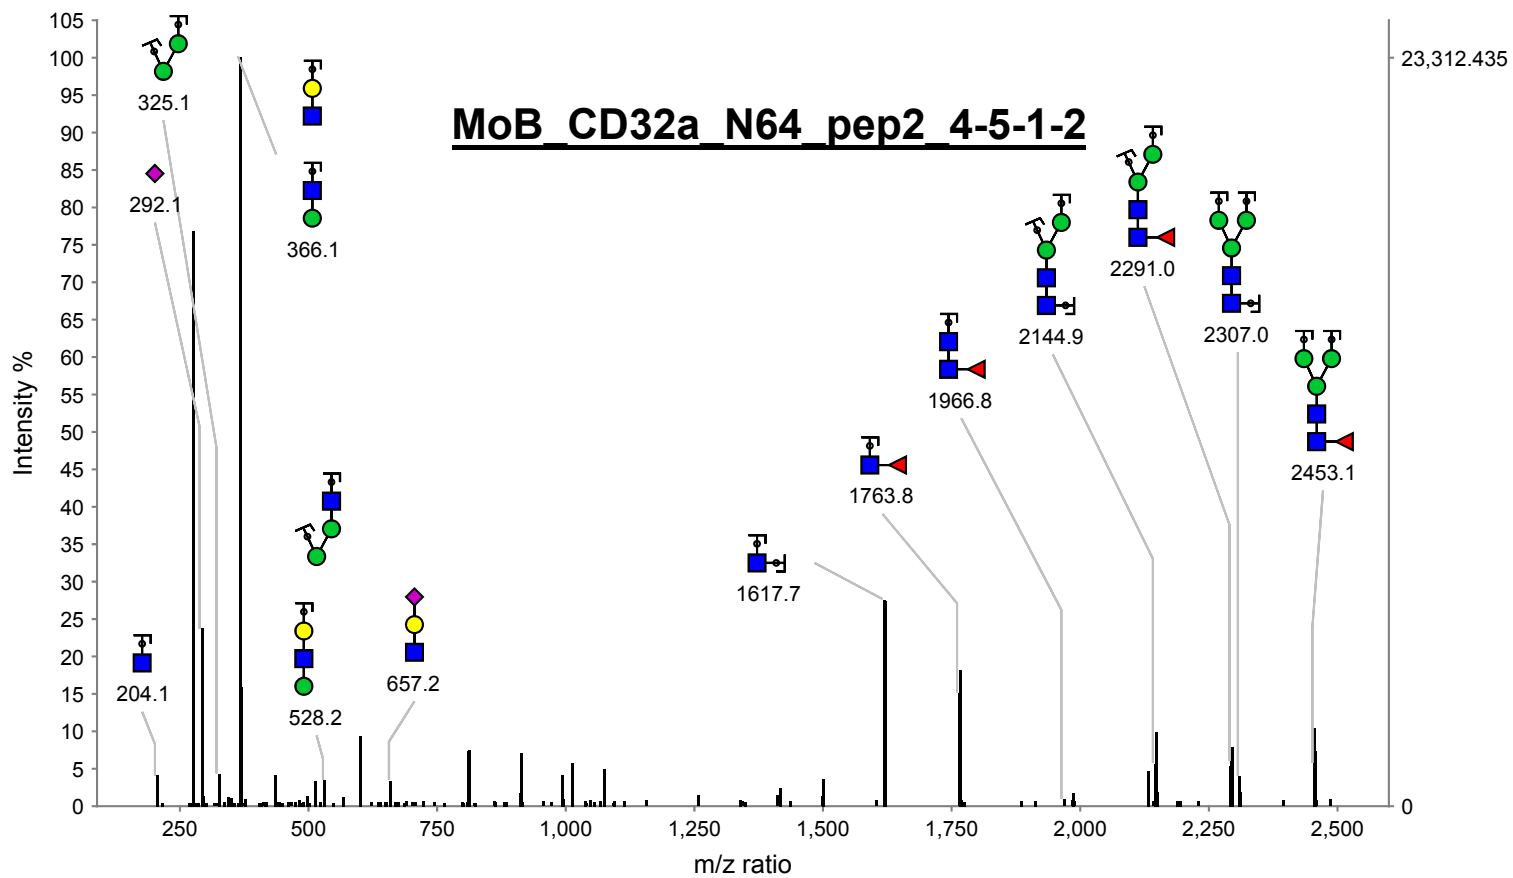

# MoB CD32a N145 pep1 3-4-0-1

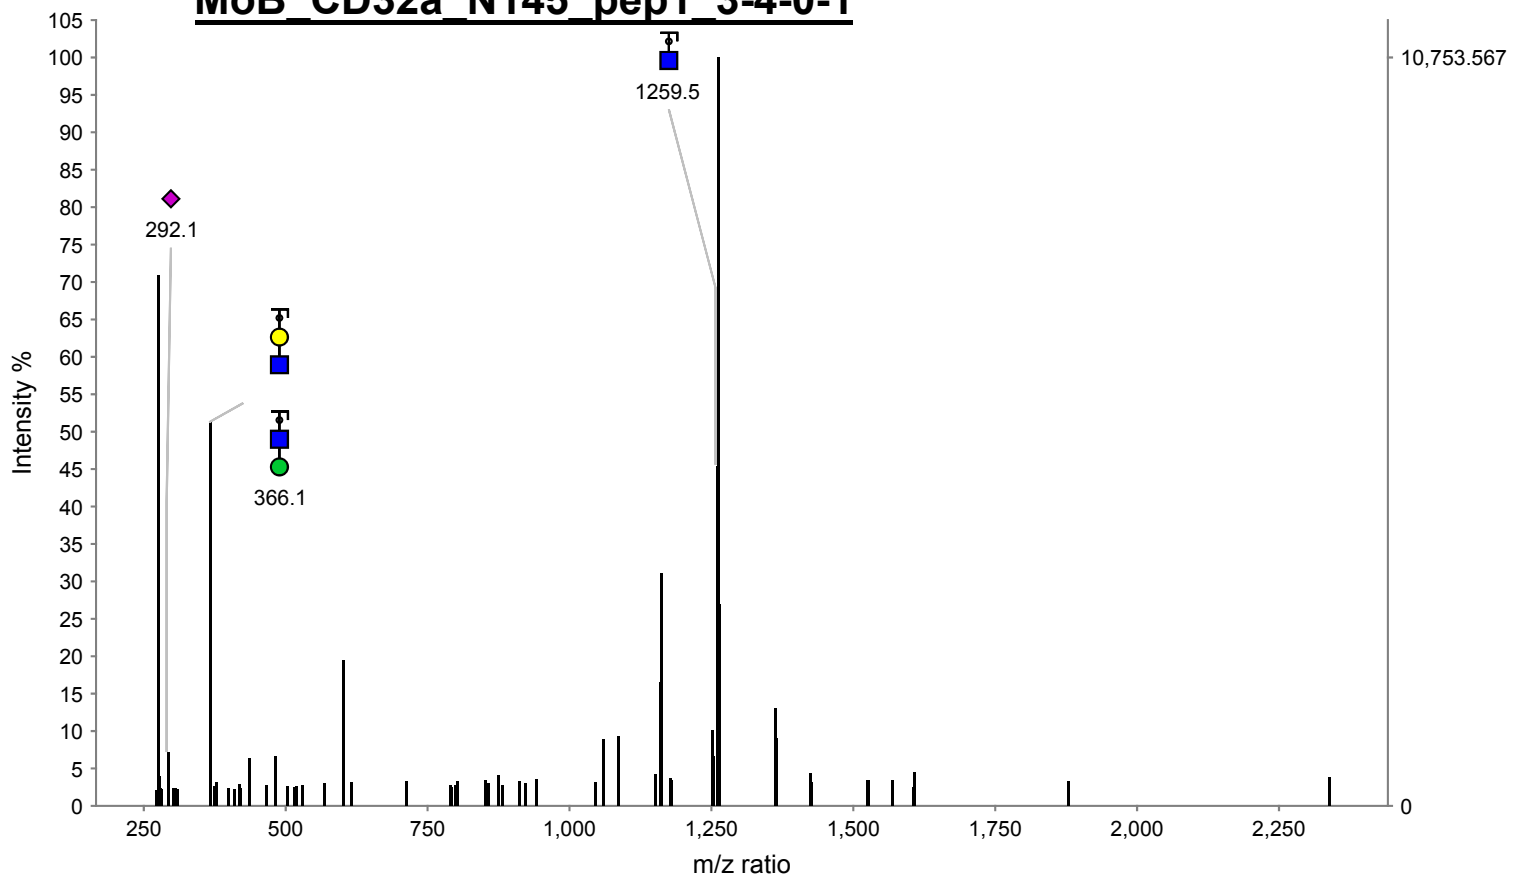

# MoB\_CD32a\_N145\_pep1\_3-5-0-1

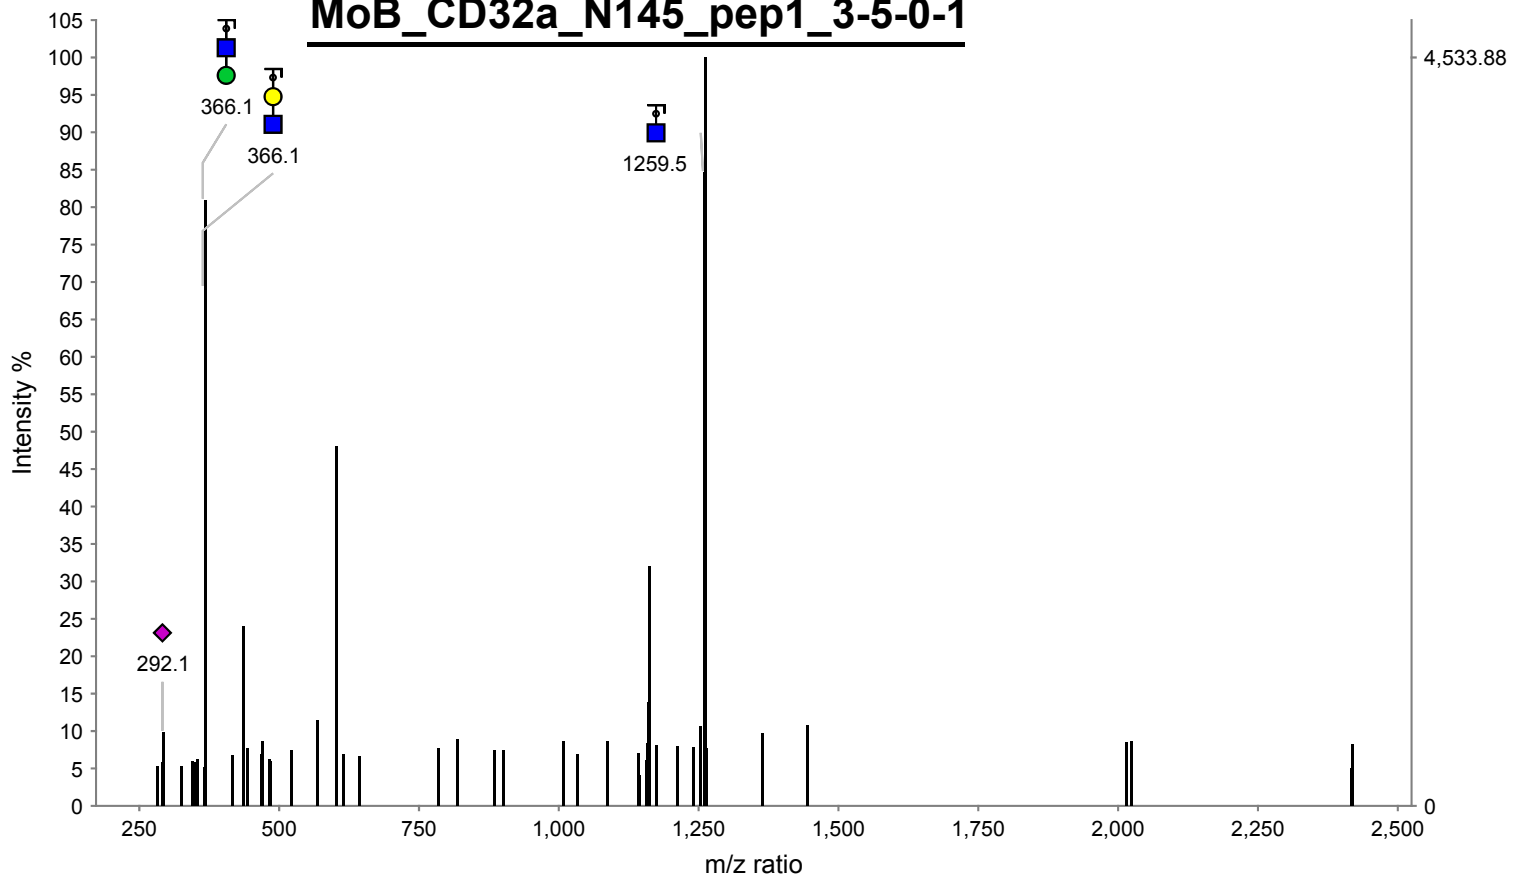

# MoB CD32a N145 pep1 4-5-1-1

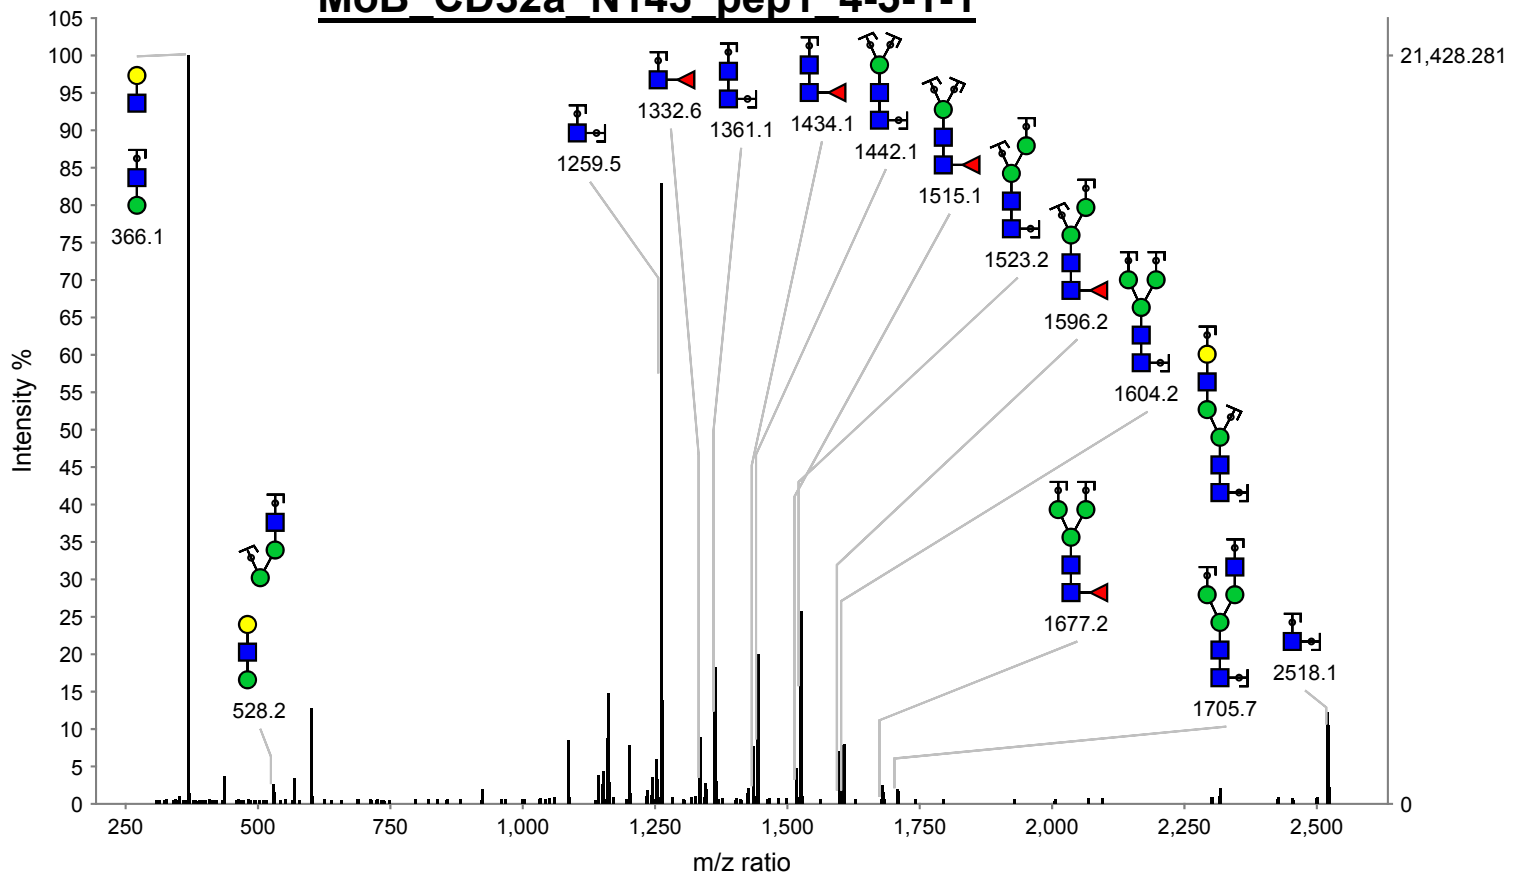

# MoB CD32a N145 pep1 4-5-1-2

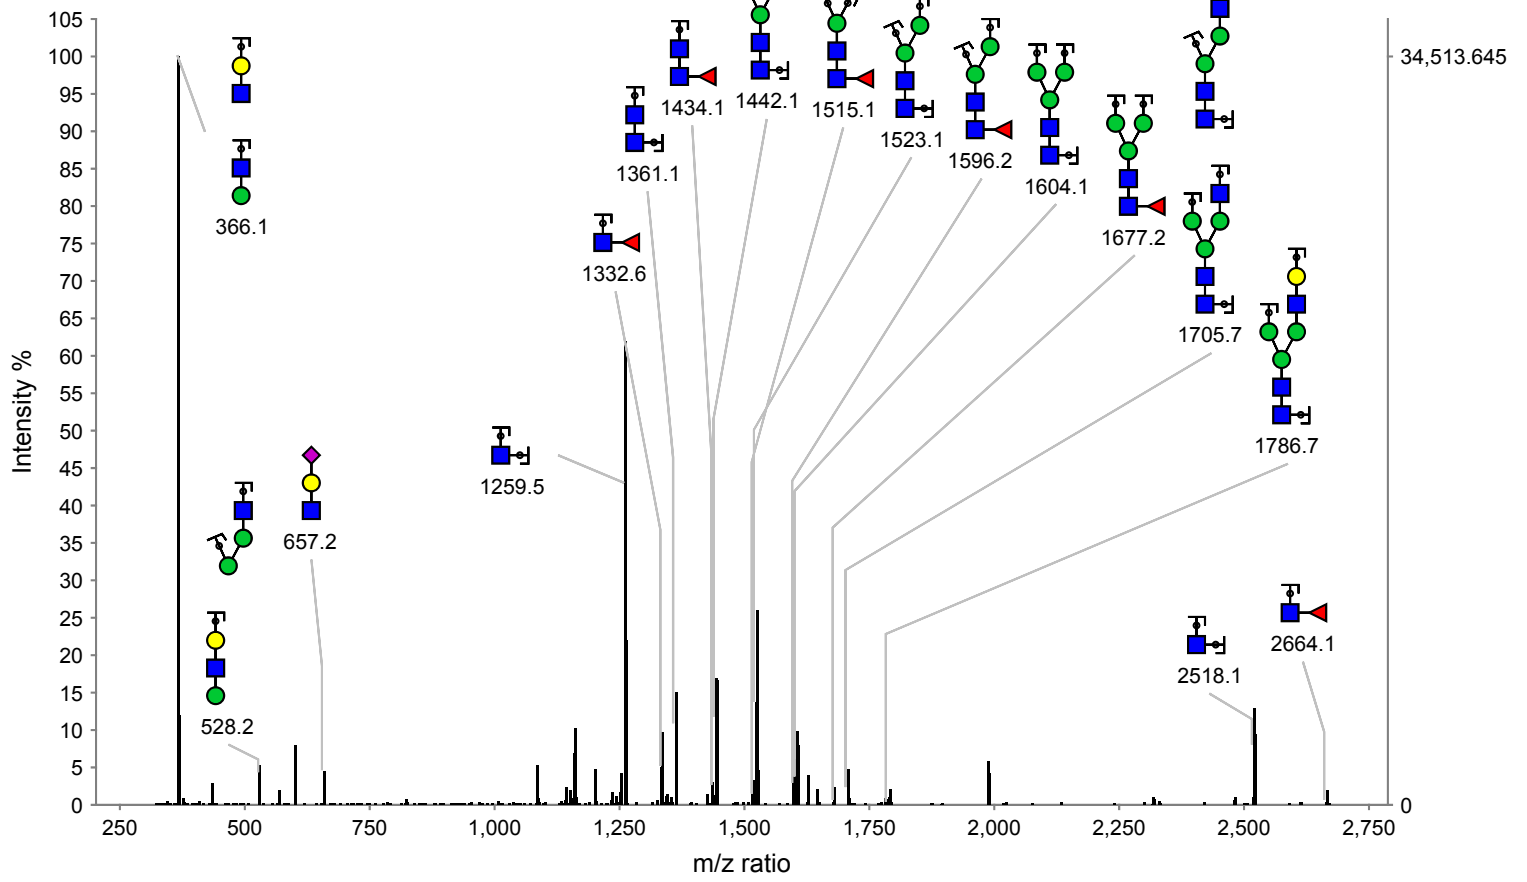

# MoB\_CD32a\_N145\_pep1\_5-6-1-2

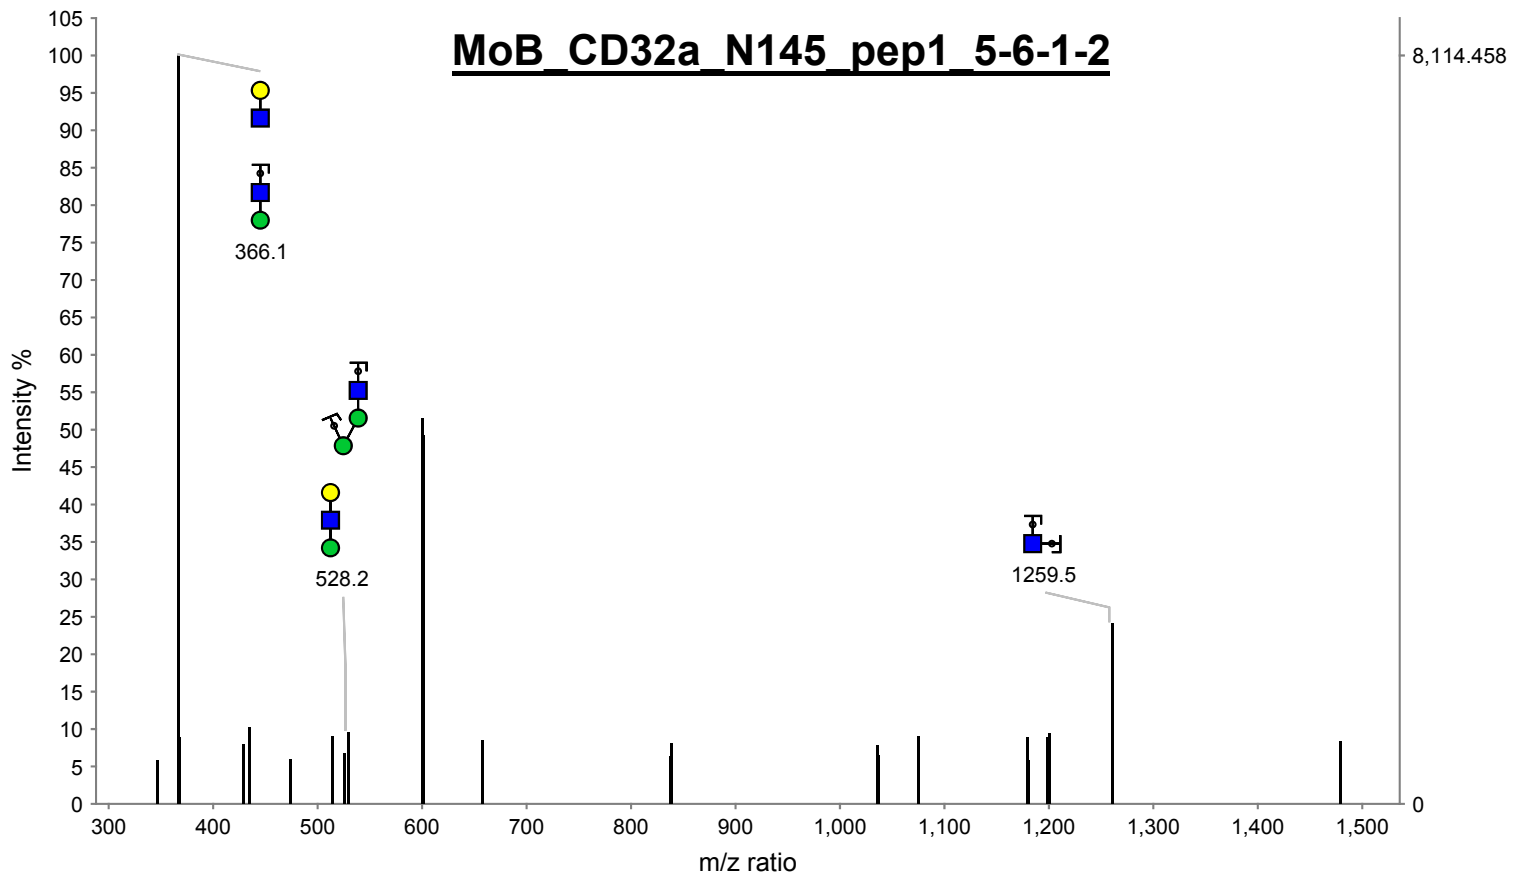

# MoB\_CD32a\_N145\_pep2\_4-5-1-2

4,446.183

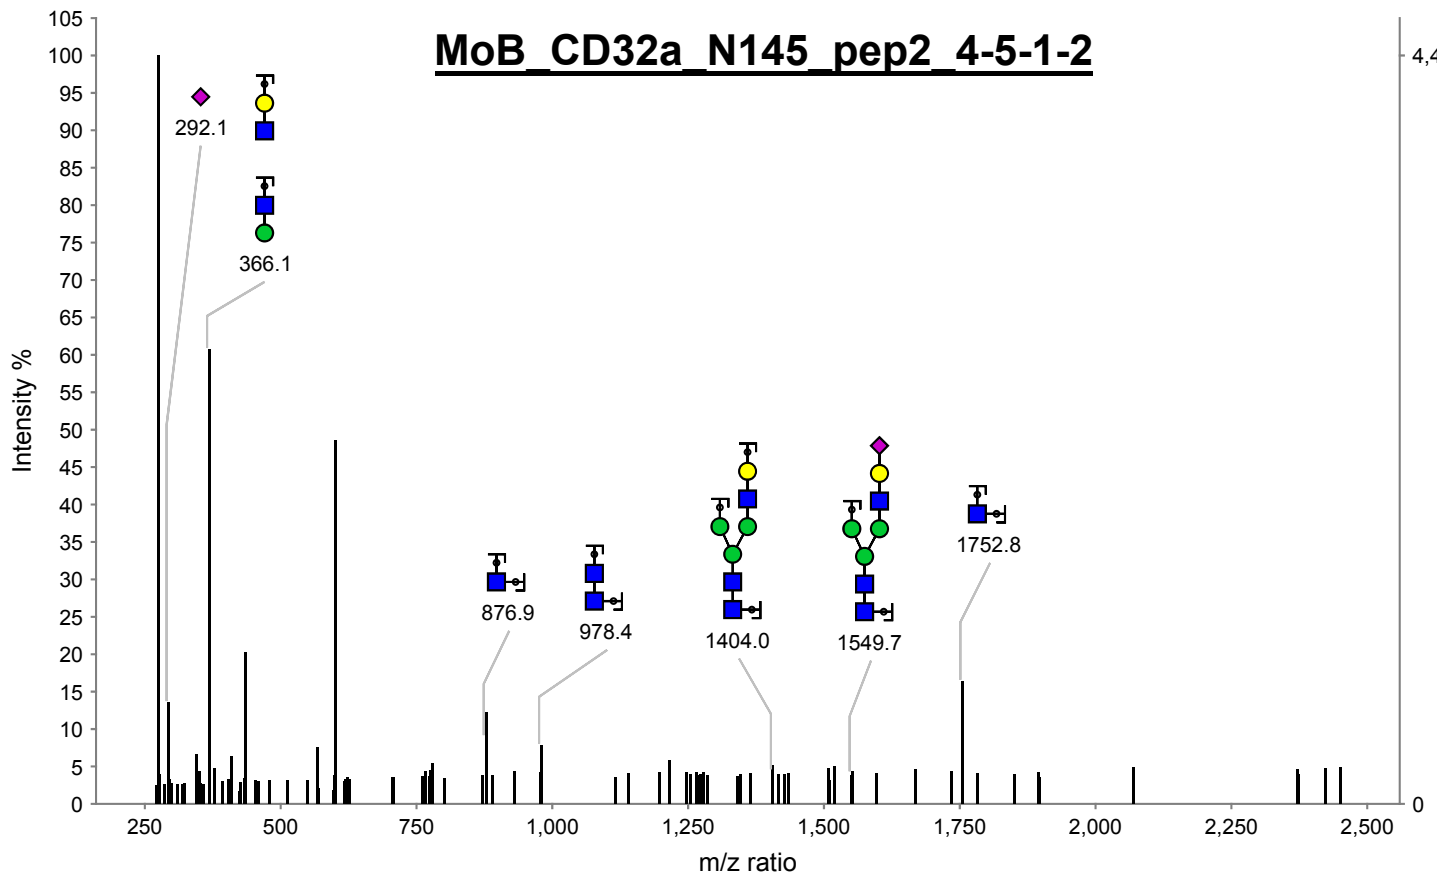

Supplement: 155201_3_supp_442237_q2b9d1.pdf [file 155201_3_supp_442237_q2b9d1.pdf]
